# Supplementary material
Source: PubMed Central journal article supplement (PMC5660497)
Supplement: JVI.00955-17_zjv999183081s1.pdf [file JVI.00955-17_zjv999183081s1.pdf]

**Table S1:** Summary of MetSV specific spacers with one until six mismatches in *M. mazei* draft genomes

| Number of mismatches | Spacer length | Spacer name                | Spacer position | consensus repeat sequence                     | # of repeats | # of spacers | Accession number   | Strain                                                          | Start position (MetSV genome) | End position (MetSV genome) |
|----------------------|---------------|----------------------------|-----------------|-----------------------------------------------|--------------|--------------|--------------------|-----------------------------------------------------------------|-------------------------------|-----------------------------|
| 1                    | 37            | contig_163_02_CRISPR_2_S16 | 1               | ATTCGTGAGCAAGATC<br>CACTAAAACAAGGATT<br>GAAAC | 114          | 113          | NZ_CP009513.1      | <i>M. mazei</i> LYC                                             | 407                           | 443                         |
| 2                    | 36            | contig_163_02_CRISPR_1_S30 | 1               | GTTTCAATCCTTGTTTT<br>AATGGATCTTGCTCGC<br>GAAT | 37           | 36           | NZ_CP009513.1      | <i>M. mazei</i> LYC                                             | 4313                          | 4348                        |
| 4                    | 35            | contig_163_02_CRISPR_1_S31 | 35              | GTTTCAATCCTTGTTTT<br>AATGGATCTTGCTCGC<br>GAAT | 37           | 36           | NZ_CP009513.1      | <i>M. mazei</i> LYC                                             | 1580                          | 1613                        |
| 4                    | 36            | contig_163_02_CRISPR_1_S26 | 33              | GTTTCAATCCTTGTTTT<br>AATGGATCTTGCTCGC<br>GAAT | 37           | 36           | NZ_CP009513.1      | <i>M. mazei</i> LYC                                             | 9298                          | 9333                        |
| 4                    | 36            | contig_207_87_CRISPR_1_S2  | 1               | ATTCGTGAGCAAGATC<br>CACTAAAACAAGGATT<br>GAAAC | 87           | 86           | NZ_JJPO0100002_5.1 | <i>M. mazei</i> strain 3.H.A.2.1 scaffold8_1_size 73144-refined | 8146                          | 8175                        |
| 4                    | 36            | contig_825_6_CRISPR1_S2    | 1               | ATTCGTGAGCAAGATC<br>CACTAAAACAAGGATT<br>GAAAC | 87           | 86           | JJPO01000025.1     | <i>M. mazei</i> strain 3.H.A.2.1 scaffold8_1_size 73144-refined | 8146                          | 8175                        |
| 4                    | 37            | contig_163_02_CRISPR_1_S32 | 1               | GTTTCAATCCTTGTTTT<br>AATGGATCTTGCTCGC<br>GAAT | 37           | 36           | NZ_CP009513.1      | <i>M. mazei</i> LYC                                             | 2739                          | 2775                        |
| 4                    | 38            | contig_163_00_CRISPR_2_S5  | 8               | ATTCGCGAGCAAGATC<br>CACTAAAACAAGGATT<br>GAAAC | 140          | 139          | NZ_CP009511.1      | <i>M. mazei</i> SarPi                                           | 3116                          | 3153                        |
| 4                    | 43            | contig_188                 | 43              | GAGCAAGATCCACTAA                              | 75           | 74           | NZ_JJPE01000147    | <i>M. mazei</i> strain                                          | 9445                          | 9478                        |

|   |    |                                  |    |                                               |    |    |                       |                                                                        |      |      |
|---|----|----------------------------------|----|-----------------------------------------------|----|----|-----------------------|------------------------------------------------------------------------|------|------|
|   |    | 64_CRISPR<br>2_S34               |    | AACAAGGATTGAAAC                               |    |    | .1                    | 3.F.A.2.3<br>scaffold90_1_siz<br>e12997-refined                        |      |      |
| 4 | 43 | contig_614<br>6_CRISPR2<br>_S34  | 43 | GAGCAAGATCCACTAA<br>AACAAGGATTGAAAC           | 75 | 74 | JJPE01000147.1        | M. mazei strain<br>3.F.A.2.3<br>scaffold90_1_siz<br>e12997-refined     | 9445 | 9478 |
| 5 | 35 | contig_156<br>39_CRISPR<br>1_S24 | 1  | ATTTCAATCCACACACC<br>CGCGAAGGGTGCGAC          | 52 | 51 | JJOV01000045.1        | Methanosarcina<br>sp. 2.H.A.1B.4<br>scaffold35_1_siz<br>e39257-refined | 6419 | 6452 |
| 5 | 35 | contig_163<br>03_CRISPR<br>1_S4  | 1  | ATTCGCGAGCAAGATC<br>CATTAAAACAAGGATT<br>GAAAC | 76 | 75 | NZ_CP009514.1         | M. mazei C16                                                           | 3583 | 3617 |
| 5 | 35 | contig_170<br>77_CRISPR<br>1_S24 | 1  | ATTTCAATCCACACACC<br>CGCGAAGGGTGCGAC          | 52 | 51 | NZ_JJOV0100004<br>5.1 | Methanosarcina<br>sp. 2.H.A.1B.4<br>scaffold35_1_siz<br>e39257-refined | 6419 | 6452 |
| 5 | 36 | contig_109<br>32_CRISPR<br>1_S42 | 36 | ATTCGTGAGCAAGATC<br>CACTAAAACAAGGATT<br>GAAAC | 54 | 53 | JJQD01000055.1        | M. mazei strain<br>1.F.A.2.8<br>scaffold51_1_siz<br>e22620-refined     | 6401 | 6436 |
| 5 | 36 | contig_163<br>01_CRISPR<br>2_S61 | 36 | ATTCGTGAGCAAGATC<br>CACTAAAACAAGGATT<br>GAAAC | 73 | 72 | NZ_CP009512.1         | M. mazei S-6                                                           | 6401 | 6436 |
| 5 | 36 | contig_208<br>65_CRISPR<br>1_S31 | 36 | ATTCGAGAGCAAGATC<br>CACTAAAACAAGGATT<br>GAAAC | 73 | 72 | NZ_JJPP01000017<br>.1 | M. mazei strain<br>3.H.A.2.4<br>scaffold36_1_siz<br>e53364-refined     | 6401 | 6436 |
| 5 | 36 | contig_514<br>_CRISPR1_S<br>42   | 36 | ATTCGTGAGCAAGATC<br>CACTAAAACAAGGATT<br>GAAAC | 54 | 53 | NZ_JJQD0100005<br>5.1 | M. mazei strain<br>1.F.A.2.8<br>scaffold51_1_siz<br>e22620-refined     | 6401 | 6436 |

|   |    |                                  |    |                                               |    |    |                       |                                                                              |      |      |
|---|----|----------------------------------|----|-----------------------------------------------|----|----|-----------------------|------------------------------------------------------------------------------|------|------|
| 5 | 36 | contig_840<br>7_CRISPR1<br>_S31  | 36 | ATTCGAGAGCAAGATC<br>CACTAAAACAAGGATT<br>GAAAC | 73 | 72 | JJPP01000017.1        | <i>M. mazei</i> strain<br>3.H.A.2.4<br>scaffold36_1_siz<br>e53364-refined    | 6401 | 6436 |
| 6 | 32 | contig_126<br>74_CRISPR<br>1_S54 | 2  | GAGTTCCCCACAAGCG<br>TGGGGATGAACCG             | 66 | 65 | JJQL01000088.1        | <i>Methanosarcina</i><br>sp. 1.H.A.2.2<br>scaffold26_1_siz<br>e92283-refined | 224  | 251  |
| 6 | 32 | contig_225<br>1_CRISPR1<br>_S54  | 2  | GAGTTCCCCACAAGCG<br>TGGGGATGAACCG             | 66 | 65 | NZ_JJQL01000088<br>.1 | <i>Methanosarcina</i><br>sp. 1.H.A.2.2<br>scaffold26_1_siz<br>e92283-refined | 224  | 251  |
| 6 | 34 | contig_109<br>48_CRISPR<br>1_S45 | 2  | GTTTCAATCCTTGTTTT<br>AATGGATCTTGCTCGC<br>GAAT | 48 | 47 | JJQD01000187.1        | <i>M. mazei</i> strain<br>1.F.A.2.8<br>scaffold47_1_siz<br>e23004-refined    | 1352 | 1381 |
| 6 | 34 | contig_186<br>00_CRISPR<br>1_S62 | 34 | ATTCGAGAGCAAGATC<br>CACTAAAACAAGGATT<br>GAAAC | 79 | 78 | NZ_JJPC01000112<br>.1 | <i>M. mazei</i> strain<br>3.F.A.1B.1<br>scaffold26_1_siz<br>e43992-refined   | 5418 | 5447 |
| 6 | 34 | contig_202<br>99_CRISPR<br>1_S62 | 34 | ATTCGAGAGCAAGATC<br>CACTAAAACAAGGATT<br>GAAAC | 73 | 72 | NZ_JJPM0100006<br>8.1 | <i>M. mazei</i> strain<br>3.H.A.1A.1<br>scaffold225_1_s<br>ize8925-refined   | 5418 | 5447 |
| 6 | 34 | contig_437<br>_CRISPR1_S<br>45   | 2  | GTTTCAATCCTTGTTTT<br>AATGGATCTTGCTCGC<br>GAAT | 48 | 47 | NZ_JJQD0100018<br>7.1 | <i>M. mazei</i> strain<br>1.F.A.2.8<br>scaffold47_1_siz<br>e23004-refined    | 1352 | 1381 |
| 6 | 34 | contig_578<br>4_CRISPR1<br>_S62  | 34 | ATTCGAGAGCAAGATC<br>CACTAAAACAAGGATT<br>GAAAC | 79 | 78 | JJPC01000112.1        | <i>M. mazei</i> strain<br>3.F.A.1B.1<br>scaffold26_1_siz<br>e43992-refined   | 5418 | 5447 |
| 6 | 34 | contig_786                       | 34 | ATTCGAGAGCAAGATC                              | 73 | 72 | JJPM01000068.1        | <i>M. mazei</i> strain                                                       | 5418 | 5447 |

|   |    |                                  |    |                                               |     |     |                       |                                                                     |      |      |
|---|----|----------------------------------|----|-----------------------------------------------|-----|-----|-----------------------|---------------------------------------------------------------------|------|------|
|   |    | 6_CRISPR1_S62                    |    | CACTAAAACAAGGATT<br>GAAAC                     |     |     |                       | 3.H.A.1A.1<br>scaffold225_1_s<br>ize8925-refined                    |      |      |
| 6 | 35 | contig_113<br>85_CRISPR<br>1_S39 | 1  | ATTCGCGAGCAAGATC<br>CACTAAAACAAGGATT<br>GAAAC | 106 | 105 | JJQE01000092.1        | M. mazei strain<br>1.F.M.0.5<br>scaffold84_1_siz<br>e12949-refined  | 9479 | 9505 |
| 6 | 35 | contig_129<br>95_CRISPR<br>1_S46 | 34 | ATTCGTGAGCAAGATC<br>CACTAAAACAAGGATT<br>GAAAC | 134 | 133 | JJQN01000148.1        | M. mazei strain<br>1.H.A.2.6<br>scaffold63_1_siz<br>e20235-refined  | 5995 | 6029 |
| 6 | 35 | contig_131<br>99_CRISPR<br>1_S5  | 31 | ATTCGTGAGCAAGATC<br>CACTAAAACAAGGATT<br>GAAAC | 104 | 103 | JJOU01000103.1        | M. mazei strain<br>2.F.T.2.6<br>scaffold12_1_siz<br>e52753-refined  | 3995 | 4026 |
| 6 | 35 | contig_140<br>69_CRISPR<br>1_S39 | 2  | ATTCGCGAGCAAGATC<br>CATTAAAACAAGGATT<br>GAAAC | 183 | 182 | JJQQ01000060.1        | M. mazei strain<br>1.H.M.0.1<br>scaffold31_1_siz<br>e37607-refined  | 7735 | 7767 |
| 6 | 35 | contig_168<br>73_CRISPR<br>1_S5  | 31 | ATTCGTGAGCAAGATC<br>CACTAAAACAAGGATT<br>GAAAC | 104 | 103 | NZ_JJOU0100010<br>3.1 | M. mazei strain<br>2.F.T.2.6<br>scaffold12_1_siz<br>e52753-refined  | 3995 | 4026 |
| 6 | 35 | contig_184<br>27_CRISPR<br>1_S39 | 1  | ATTCGCGAGCAAGATC<br>CACTAAAACAAGGATT<br>GAAAC | 107 | 106 | NZ_JJPB01000021<br>.1 | M. mazei strain<br>3.F.A.1A.3<br>scaffold85_1_siz<br>e13020-refined | 9479 | 9505 |
| 6 | 35 | contig_187<br>61_CRISPR<br>1_S39 | 1  | ATTCGTGAGCAAGATC<br>CATTAAAACAAGGATT<br>GAAAC | 54  | 53  | NZ_JJPD0100019<br>1.1 | M. mazei strain<br>3.F.A.2.12<br>scaffold130_1_s<br>ize9136-refined | 9479 | 9505 |
| 6 | 35 | contig_191<br>13_CRISPR          | 1  | ATTCGCGAGCAAGATC<br>CACTAAAACAAGGATT          | 108 | 107 | NZ_JJPF01000076<br>.1 | M. mazei strain<br>3.F.A.2.5                                        | 9479 | 9505 |

|   |    |                            |    |                                               |     |     |                       |                                                                 |      |      |
|---|----|----------------------------|----|-----------------------------------------------|-----|-----|-----------------------|-----------------------------------------------------------------|------|------|
|   |    | 1_S39                      |    | GAAAC                                         |     |     |                       | scaffold102_1_size13109-refined                                 |      |      |
| 6 | 35 | contig_192_85_CRISPR_1_S39 | 1  | ATTCGCGAGCAAGATC<br>CACTAAAACAAGGATT<br>GAAAC | 106 | 105 | NZ_JJPG0100002<br>9.1 | M. mazei strain<br>3.F.A.2.6<br>scaffold88_1_size12957-refined  | 9479 | 9505 |
| 6 | 35 | contig_195_14_CRISPR_1_S38 | 1  | ATTCGCGAGCAAGATC<br>CACTAAAACAAGGATT<br>GAAAC | 105 | 104 | NZ_JJPH0100005<br>9.1 | M. mazei strain<br>3.F.A.2.7<br>scaffold83_1_size12932-refined  | 9479 | 9505 |
| 6 | 35 | contig_200_64_CRISPR_1_S3  | 34 | ATCGCAATCGGTTAGA<br>AAACTCGTTAGAGATT<br>GAAAC | 64  | 63  | NZ_JJPL01000042<br>.1 | M. mazei strain<br>3.F.T.2.1<br>scaffold49_1_size29560-refined  | 4739 | 4767 |
| 6 | 35 | contig_261_7_CRISPR1_S46   | 34 | ATTCGTGAGCAAGATC<br>CACTAAAACAAGGATT<br>GAAAC | 134 | 133 | NZ_JJQN0100014<br>8.1 | M. mazei strain<br>1.H.A.2.6<br>scaffold63_1_size20235-refined  | 5995 | 6029 |
| 6 | 35 | contig_342_7_CRISPR1_S39   | 2  | ATTCGCGAGCAAGATC<br>CATTAAAACAAGGATT<br>GAAAC | 183 | 182 | NZ_JJQQ0100006<br>0.1 | M. mazei strain<br>1.H.M.0.1<br>scaffold31_1_size37607-refined  | 7735 | 7767 |
| 6 | 35 | contig_440_2_CRISPR1_S39   | 1  | ATTCGCGAGCAAGATC<br>CACTAAAACAAGGATT<br>GAAAC | 107 | 106 | JJPB01000021.1        | M. mazei strain<br>3.F.A.1A.3<br>scaffold85_1_size13020-refined | 9479 | 9505 |
| 6 | 35 | contig_596_4_CRISPR1_S39   | 1  | ATTCGTGAGCAAGATC<br>CATTAAAACAAGGATT<br>GAAAC | 54  | 53  | JJPD01000191.1        | M. mazei strain<br>3.F.A.2.12<br>scaffold130_1_size9136-refined | 9479 | 9505 |
| 6 | 35 | contig_600_CRISPR1_S       | 1  | ATTCGCGAGCAAGATC<br>CACTAAAACAAGGATT          | 106 | 105 | NZ_JJQE0100009<br>2.1 | M. mazei strain<br>1.F.M.0.5                                    | 9479 | 9505 |

|   |    |                                   |    |                                               |     |     |                |                                                                     |       |       |
|---|----|-----------------------------------|----|-----------------------------------------------|-----|-----|----------------|---------------------------------------------------------------------|-------|-------|
|   |    | 39                                |    | GAAAC                                         |     |     |                | scaffold84_1_size12949-refined                                      |       |       |
| 6 | 35 | contig_627<br>7_CRISPR1<br>_S39   | 1  | ATTCGCGAGCAAGATC<br>CACTAAAACAAGGATT<br>GAAAC | 108 | 107 | JJPF01000076.1 | M. mazei strain<br>3.F.A.2.5<br>scaffold102_1_size13109-<br>refined | 9479  | 9505  |
| 6 | 35 | contig_650<br>2_CRISPR1<br>_S39   | 1  | ATTCGCGAGCAAGATC<br>CACTAAAACAAGGATT<br>GAAAC | 106 | 105 | JJPG01000029.1 | M. mazei strain<br>3.F.A.2.6<br>scaffold88_1_size12957-refined      | 9479  | 9505  |
| 6 | 35 | contig_668<br>3_CRISPR1<br>_S38   | 1  | ATTCGCGAGCAAGATC<br>CACTAAAACAAGGATT<br>GAAAC | 105 | 104 | JJPH01000059.1 | M. mazei strain<br>3.F.A.2.7<br>scaffold83_1_size12932-refined      | 9479  | 9505  |
| 6 | 35 | contig_758<br>1_CRISPR1<br>_S3    | 34 | ATCGCAATCGGTTAGA<br>AAACTCGTTAGAGATT<br>GAAAC | 63  | 62  | JJPL01000042.1 | M. mazei strain<br>3.F.T.2.1<br>scaffold49_1_size29560-refined      | 4739  | 4767  |
| 6 | 36 | contig_129<br>95_CRISPR<br>1_S125 | 36 | ATTCGTGAGCAAGATC<br>CACTAAAACAAGGATT<br>GAAAC | 134 | 133 | JJQN01000148.1 | M. mazei strain<br>1.H.A.2.6<br>scaffold63_1_size20235-refined      | 10342 | 10376 |
| 6 | 36 | contig_156<br>89_CRISPR<br>1_S8   | 4  | ATTGCAATTGGTTGA<br>AAACTCGTTAGAGATT<br>GAAAC  | 105 | 104 | JJOV01000033.1 | Methanosarcina<br>sp. 2.H.A.1B.4<br>scaffold8_1_size95506-refined   | 4213  | 4248  |
| 6 | 36 | contig_163<br>01_CRISPR<br>2_S34  | 36 | ATTCGTGAGCAAGATC<br>CACTAAAACAAGGATT<br>GAAAC | 73  | 72  | NZ_CP009512.1  | M. mazei S-6                                                        | 10342 | 10376 |
| 6 | 36 | contig_163<br>02_CRISPR<br>2_S24  | 3  | ATTCGTGAGCAAGATC<br>CACTAAAACAAGGATT<br>GAAAC | 114 | 113 | NZ_CP009513.1  | M. mazei LYC                                                        | 4971  | 5005  |

|   |    |                                  |    |                                               |     |     |                       |                                                                       |       |       |
|---|----|----------------------------------|----|-----------------------------------------------|-----|-----|-----------------------|-----------------------------------------------------------------------|-------|-------|
| 6 | 36 | contig_170<br>65_CRISPR<br>1_S8  | 4  | ATTGCAATTGGTTTGA<br>AAACTCGTTAGAGATT<br>GAAAC | 105 | 104 | NZ_JJOV0100003<br>3.1 | Methanosarcina<br>sp. 2.H.A.1B.4<br>scaffold8_1_size<br>95506-refined | 4213  | 4248  |
| 6 | 36 | contig_261<br>7_CRISPR1<br>_S125 | 36 | ATTCGTGAGCAAGATC<br>CACTAAAACAAGGATT<br>GAAAC | 134 | 133 | NZ_JJQN0100014<br>8.1 | M. mazei strain<br>1.H.A.2.6<br>scaffold63_1_siz<br>e20235-refined    | 10342 | 10376 |
| 6 | 37 | contig_163<br>03_CRISPR<br>1_S50 | 33 | ATTCGCGAGCAAGATC<br>CATTAAAACAAGGATT<br>GAAAC | 76  | 75  | NZ_CP009514.1         | M. mazei C16                                                          | 2473  | 2508  |
| 6 | 39 | contig_156<br>89_CRISPR<br>1_S9  | 38 | ATTGCAATTGGTTTGA<br>AAACTCGTTAGAGATT<br>GAAAC | 105 | 104 | JJOV01000033.1        | Methanosarcina<br>sp. 2.H.A.1B.4<br>scaffold8_1_size<br>95506-refined | 9382  | 9416  |
| 6 | 39 | contig_170<br>65_CRISPR<br>1_S9  | 38 | ATTGCAATTGGTTTGA<br>AAACTCGTTAGAGATT<br>GAAAC | 105 | 104 | NZ_JJOV0100003<br>3.1 | Methanosarcina<br>sp. 2.H.A.1B.4<br>scaffold8_1_size<br>95506-refined | 9382  | 9416  |

**Table S2:** Primer used in this study

| <b>ORF or genome region</b> | <b>Primer set</b>                  | <b>Sequence 5'=&gt;3'</b>                       |
|-----------------------------|------------------------------------|-------------------------------------------------|
| Spacer 1-29 IB-locus        | C1_for<br>C1_rev2                  | TGCGTAGATTGCTGTTACCGG<br>TCCCCTGTTTTCCAGATACCG  |
| Spacer 1-9 IIIC-locus       | CRISPR_IIIC_for<br>CRISPR_IIICsp_r | GATTTCAAACCCCTTCCACAG<br>AATGCTAAACTCACGGGAAAC  |
| <b>qRT-PCR primer</b>       |                                    |                                                 |
| MM1215                      | MM1215 for<br>MM1215 rev           | TCAAGAGCGAGGGCATGAATG<br>GCACTACCGAGAACAATAGCC  |
| MM1621                      | MM1621 for<br>MM1621 rev           | TAGGAGGTTTTCTCGGAAGCG<br>AAGCGTATCTCCATCAAGCCC  |
| MM2181                      | MM2181 for<br>MM2181 rev           | GCCTCCATGAGAAGAATGCTC<br>CTTCAAGGTCTCCAACCTCCTG |
| MM0002                      | MM_0002 qrt for<br>MM_0002 qrt rev | TTTGACCCTCTTCTGGGATGG<br>TCAGCTGTTAGCTTCTCTCCG  |
| MM0276                      | MM_0276 qrt for<br>MM_0276 qrt rev | GGCCCAGAAATGGATCTGAAG<br>TTCTGCCCCCTTATCATCACC  |
| MM0490                      | MM_0490 qrt for<br>MM_0490 qrt rev | TCTTCTCCTGCTCCTGTTCTC<br>AGAGAATTGACCGAAGGCTCC  |
| MM0807                      | MM_0807 qrt for<br>MM_0807 qrt rev | GTTCTCCTCTTACAAAGCCG<br>TCCAACCTGCATTCAGCCTGTC  |
| MM1009                      | MM_1009 qrt for<br>MM_1009 qrt rev | AAGCGTTGGTCAGGCAATTCG<br>GGGCAACATTGTCAGCAGTAC  |
| MM1601                      | MM1601 qrt for<br>MM1601 qrt rev   | TCTCGCACAGAATGTATCGGC<br>GCACTTTTAAGGTCATCCCCG  |
| MM2021                      | MM_2021 qrt for<br>MM_2021 qrt rev | TAAGGGAAGATCTGCAGGGGA<br>ACCCAGCGGAGTAATCGAAGT  |
| MM2833                      | MM_2833 qrt for<br>MM_2833 qrt rev | AACGGGGTTGAATTCGCGCT<br>TTTGTTACGTCCCTGCCGTCT   |
| MM3096                      | MM_3096 qrt for<br>MM_3096 qrt rev | CTCTAGGGGCATCAAACGGAA<br>ACTGCCCGGAAATTCCTGTGA  |
| MM0565                      | MM565 for<br>MM565 rev             | CCTGTTATTATCTGTGTGACGC<br>ATGACCTGGTTGCCTCTATC  |
| MM0564                      | MM564 for<br>MM564 rev             | ATTTTTGATGTGTTGTATGG<br>TTTGTTGAAGAAGGTTTTTG    |
| MM0563                      | MM563 for<br>MM563 rev             | GGGGAAGGAAAAGTCAGTC<br>CATTAAATTAGTGCTGCGGTG    |
| MM0562                      | MM562 for<br>MM562 rev             | GACTGCTTGGTTTTTAGGG<br>GGAGAAAGCACTTGAATACC     |
| MM0561                      | MM561 for<br>MM561 rev             | TGTATGGCACATGACTTTGG<br>ACGGGCATCTTTTACACTTC    |
| MM0560                      | MM560 for<br>MM560 rev             | CGGATTAGACGAAGGTTCAA<br>TAAAGCGAGCCAAGGAGTT     |
| MM0559                      | MM559 for<br>MM559 rev             | AATGGCAGAAGCAGAAACC<br>AAACCGTCCTGTCAATGTG      |
| MM0558                      | MM558 for<br>MM 558 rev            | GGGCTTTACAGGGTTCAGA<br>ATTATCTCGTCGCTGACAAG     |



|                                        |                                    |                                                 |
|----------------------------------------|------------------------------------|-------------------------------------------------|
| MM0557                                 | MM557 for<br>MM557 rev             | AGCAACAGCCTGGTCAAAG<br>TCCGGTAACAGCAATCTACG     |
| leader IB                              | leader IB for<br>leader IB rev     | AGGGTTTGATAATTTTCCAG<br>AAAAGCGGTGTTAAGTCA      |
| MM3353                                 | qRTMM3353 for<br>qRTMM3353 rev     | ATGGTATGGTCCTTATATCGT<br>CTGAATCGTAGATTTTCTGC   |
| MM3354                                 | qRTMM3354 for<br>qRTMM3354 rev     | CAGGCACTCATGAAAGATAC<br>GGTCGTTTCTAAGAGTCTAATCC |
| MM3355                                 | qRTMM3355 for<br>qRTMM3355 rev     | CTCAACAACGCTACCTATTC<br>CATGATTTTTTCCCTTTAGTG   |
| MM3356                                 | qRTMM3356 for2<br>qRTMM3356 rev2   | AGTTCTTGTGACAAACCATC<br>TTCTCTTTATTTGTCCCTCGG   |
| MM3357                                 | qRTMM3357 for<br>qRTMM3357 rev     | ACTGTCAGATAATTTCCGAG<br>CAAAGAGTAGCTGGGTAATG    |
| MM3358                                 | qRTMM3358 for<br>qRTMM3358 rev     | AGAGGAATAGGAGAATACGC<br>GATAGCCACCAGTTATTTCC    |
| MM3359                                 | qRTMM3359 for<br>qRTMM3359 rev     | ATGAGTCCAGGGAATATTAAG<br>TACTGCACAAGAGGGTAGC    |
| MM3360                                 | qRTMM3360 for<br>qRTMM3360 rev     | CCTGAGAGAGTTAAGGAAGC<br>TCAATAGACCCTTCGGTAG     |
| leader IIIC                            | qRTIIICrRNA for<br>qRTIIICrRNA r2  | TCCAAACCACTAAAAAACC<br>AAGGATCTCATAACGTGAATTAG  |
| <b>RT-PCR primer (one step RT-PCR)</b> |                                    |                                                 |
| MSV06                                  | MSVORF6 rt for<br>MSVORF6 rt rev   | TTCAGGCGTCAACAGATGCAG<br>GCTTCATCATCGCCTTCTATC  |
| MSV07                                  | MSVORF7 rt for<br>MSVORF7 rt rev   | ACGACTTATCCGGGTTACTGG<br>CCTATTGCTTCGCCTAATGCC  |
| MSV13                                  | MSVORF13 rt for<br>MSVORF13 rt rev | ATAGACGCCTACAGAATCCCC<br>ATCTACCGAAGCCGGTCTTTG  |
| MSV15                                  | MSVORF15 rt for<br>MSVORF15 rt rev | TTGGGATTCCTTCGCTATCGG<br>TCCGCCGTCGATTATTGGAAC  |
| MSV19                                  | MSVORF19 rt for<br>MSVORF19 rt rev | TGGACAATACGGCGACTAACC<br>TAACATCAATACCGGCGGGTG  |
| MSV22                                  | MSVORF22 rt for<br>MSVORF22 rt rev | TATGTGCCGGATGTGATAGG<br>TGGCGTATCCGTTGGTAAAGG   |

**Table S3:** MSV ORF proteins identified via stacking gel SDS-PAGE – LC-MS analysis in Sample #1 (viral proteins extracted via filtration). PSMs, peptide spectral matches; AAs, amino acid residues in ORF protein; MW, molecular weight; Protein FDR, protein level false discovery rate (high, FDR <1%).

| Protein     | Peptide Sequence (prefix = location in protein) | Modifications        | # PSMs    | Coverage [%] | # Peptides | # Unique Peptides | # AAs      | MW [kDa]    | Protein FDR |
|-------------|-------------------------------------------------|----------------------|-----------|--------------|------------|-------------------|------------|-------------|-------------|
| <b>ORF5</b> |                                                 |                      | <b>10</b> | <b>49</b>    | <b>4</b>   | <b>4</b>          | <b>92</b>  | <b>10.7</b> | <b>High</b> |
|             | 19_TGISINVTLSDGSTGTLQR                          |                      | 2         |              |            |                   |            |             |             |
|             | 7_ITNYSLSFFK                                    |                      | 2         |              |            |                   |            |             |             |
|             | 63_LVWGLYDMR                                    |                      | 2         |              |            |                   |            |             |             |
|             | 63_LVWGLYDMR                                    | 1xOxidation [M8]     | 2         |              |            |                   |            |             |             |
|             | 42_FNVMQ GK                                     |                      | 2         |              |            |                   |            |             |             |
| <b>ORF6</b> |                                                 |                      | <b>29</b> | <b>36</b>    | <b>8</b>   | <b>8</b>          | <b>244</b> | <b>28.5</b> | <b>High</b> |
|             | 104_VMMPIVNVEQPQQIEEALPAAK                      | 2xOxidation [M2; M3] | 4         |              |            |                   |            |             |             |
|             | 104_VMMPIVNVEQPQQIEEALPAAK                      | 1xOxidation [M2]     | 1         |              |            |                   |            |             |             |
|             | 104_VMMPIVNVEQPQQIEEALPAAK                      |                      | 2         |              |            |                   |            |             |             |
|             | 211_MIESWLQNFFK                                 |                      | 3         |              |            |                   |            |             |             |
|             | 45_QQMQEALR                                     |                      | 3         |              |            |                   |            |             |             |
|             | 165_YDDDATDSEEIEGDDEAGGEK                       |                      | 3         |              |            |                   |            |             |             |
|             | 6_ALSFNQK                                       |                      | 7         |              |            |                   |            |             |             |
|             | 22_ANPDKSYNQLEK                                 |                      | 1         |              |            |                   |            |             |             |
|             | 27_SYNQLEK                                      |                      | 3         |              |            |                   |            |             |             |
|             | 13_MDAFLK                                       |                      | 2         |              |            |                   |            |             |             |
| <b>ORF7</b> |                                                 |                      | <b>26</b> | <b>26</b>    | <b>9</b>   | <b>9</b>          | <b>359</b> | <b>41.2</b> | <b>High</b> |
|             | 140_VTIAGNALALFR                                |                      | 2         |              |            |                   |            |             |             |
|             | 67_YYVTFLDSMNDFK                                |                      | 1         |              |            |                   |            |             |             |

|              |                                    |                        |           |           |          |          |            |             |             |
|--------------|------------------------------------|------------------------|-----------|-----------|----------|----------|------------|-------------|-------------|
|              | 317_AEGSCLELFFVK                   | 1xCarbamidomethyl [C5] | 2         |           |          |          |            |             |             |
|              | 123_ALNIFFDVLR                     |                        | 5         |           |          |          |            |             |             |
|              | 328_YLLNSLYGK                      |                        | 2         |           |          |          |            |             |             |
|              | 161_VNVELDNK                       |                        | 4         |           |          |          |            |             |             |
|              | 215_KGEGLEVLLALLNNPR               |                        | 4         |           |          |          |            |             |             |
|              | 256_LYFPTSK                        |                        | 4         |           |          |          |            |             |             |
|              | 207_YPNPQMLR                       |                        | 2         |           |          |          |            |             |             |
| <b>ORF8</b>  |                                    |                        | <b>6</b>  | <b>41</b> | <b>3</b> | <b>3</b> | <b>79</b>  | <b>9.2</b>  | <b>High</b> |
|              | 41_IPVNFTEPASQSQLIR                |                        | 2         |           |          |          |            |             |             |
|              | 32_LWGIEELTR                       |                        | 2         |           |          |          |            |             |             |
|              | 72_VNPTTWK                         |                        | 2         |           |          |          |            |             |             |
| <b>ORF10</b> |                                    |                        | <b>24</b> | <b>46</b> | <b>4</b> | <b>4</b> | <b>117</b> | <b>13.5</b> | <b>High</b> |
|              | 4_TSDVIELLESGENDTAK                |                        | 4         |           |          |          |            |             |             |
|              | 21_IKEQTGASESLITR                  |                        | 13        |           |          |          |            |             |             |
|              | 23_EQTGASESLITR                    |                        | 4         |           |          |          |            |             |             |
|              | 49_QEEAKEEEEEPTDEEIDGIITK          |                        | 3         |           |          |          |            |             |             |
| <b>ORF13</b> |                                    |                        | <b>26</b> | <b>44</b> | <b>7</b> | <b>7</b> | <b>202</b> | <b>23.2</b> | <b>High</b> |
|              | 46_VLCLDPLNVIDGEIDAYR              | 1xCarbamidomethyl [C3] | 5         |           |          |          |            |             |             |
|              | 151_NIGVVMSTQRPASVDTGVIGLTDYLVLFRR | 1xOxidation [M6]       | 2         |           |          |          |            |             |             |
|              | 108_CDWLFPALTFRR                   | 1xCarbamidomethyl [C1] | 4         |           |          |          |            |             |             |
|              | 91_NVVVYFNEMLR                     | 1xOxidation [M9]       | 2         |           |          |          |            |             |             |
|              | 21_TISIIGGK                        |                        | 8         |           |          |          |            |             |             |
|              | 46_VLCLDPLNVIDGEIDAYRIPIR          | 1xCarbamidomethyl [C3] | 2         |           |          |          |            |             |             |
|              | 38_MLLDQSKR                        | 1xOxidation [M1]       | 3         |           |          |          |            |             |             |
| <b>ORF15</b> |                                    |                        | <b>63</b> | <b>52</b> | <b>6</b> | <b>6</b> | <b>102</b> | <b>10.3</b> | <b>High</b> |

|              |                               |                         |            |           |           |           |            |             |             |
|--------------|-------------------------------|-------------------------|------------|-----------|-----------|-----------|------------|-------------|-------------|
|              | 8_KAVTFESGSLWDSFAIGAVK        |                         | 29         |           |           |           |            |             |             |
|              | 50_GAAGVVIQSAIK               |                         | 17         |           |           |           |            |             |             |
|              | 9_AVTFESGSLWDSFAIGAVK         |                         | 12         |           |           |           |            |             |             |
|              | 33_AMIPVVGNGSLK               |                         | 1          |           |           |           |            |             |             |
|              | 1_MVDLVPK                     | 1xOxidation [M1]        | 3          |           |           |           |            |             |             |
|              | 50_GAAGVVIQSAIKGK             |                         | 1          |           |           |           |            |             |             |
| <b>ORF16</b> |                               |                         | <b>263</b> | <b>82</b> | <b>12</b> | <b>12</b> | <b>146</b> | <b>15.7</b> | <b>High</b> |
|              | 105_GVTAIAANGWVTIGSYTVPAQEEIR |                         | 4          |           |           |           |            |             |             |
|              | 41_LAPIVPMSQATLREDDKILVEYK    |                         | 13         |           |           |           |            |             |             |
|              | 41_LAPIVPMSQATLREDDK          | 1xOxidation [M7]        | 16         |           |           |           |            |             |             |
|              | 41_LAPIVPMSQATLREDDK          |                         | 8          |           |           |           |            |             |             |
|              | 64_TGTASQITGTSCSAR            | 1xCarbamidomethyl [C12] | 22         |           |           |           |            |             |             |
|              | 22_QVLYETGSEIAVLGGSDPR        |                         | 23         |           |           |           |            |             |             |
|              | 11_IVKTDASETVR                |                         | 10         |           |           |           |            |             |             |
|              | 88_TGNVAESFLR                 |                         | 29         |           |           |           |            |             |             |
|              | 41_LAPIVPMSQATLR              |                         | 9          |           |           |           |            |             |             |
|              | 41_LAPIVPMSQATLR              | 1xOxidation [M7]        | 31         |           |           |           |            |             |             |
|              | 130_LGQSAENSR                 |                         | 22         |           |           |           |            |             |             |
|              | 54_EDDKILVEYK                 |                         | 32         |           |           |           |            |             |             |
|              | 41_LAPIVPMSQATLREDDKILVEYK    | 1xOxidation [M7]        | 19         |           |           |           |            |             |             |
|              | 58_ILVEYK                     |                         | 15         |           |           |           |            |             |             |
|              | 98_SSDVFAR                    |                         | 10         |           |           |           |            |             |             |
| <b>ORF17</b> |                               |                         | <b>11</b>  | <b>36</b> | <b>2</b>  | <b>2</b>  | <b>55</b>  | <b>6.4</b>  | <b>High</b> |
|              | 34_IAVCLESVSLTLK              | 1xCarbamidomethyl [C4]  | 2          |           |           |           |            |             |             |
|              | 47_DIKDDLK                    |                         | 9          |           |           |           |            |             |             |
| <b>ORF18</b> |                               |                         | <b>7</b>   | <b>55</b> | <b>3</b>  | <b>3</b>  | <b>106</b> | <b>10.9</b> | <b>High</b> |

|              |                                       |                         |           |           |           |           |            |             |             |  |
|--------------|---------------------------------------|-------------------------|-----------|-----------|-----------|-----------|------------|-------------|-------------|--|
|              | 69_SEASAIPTIETGGGMDLSQLIPVALIIGGAVIIK | 1xOxidation [M15]       | 1         |           |           |           |            |             |             |  |
|              | 42_SYSIQYPTYQVQIDSPLASQTTK            |                         | 4         |           |           |           |            |             |             |  |
|              | 42_SYSIQYPTYQVQIDSPLASQTTKK           |                         | 2         |           |           |           |            |             |             |  |
| <b>ORF19</b> |                                       |                         | <b>37</b> | <b>83</b> | <b>7</b>  | <b>7</b>  | <b>90</b>  | <b>10.2</b> | <b>High</b> |  |
|              | 71_GEFYAYTTAPAGIDVR                   |                         | 4         |           |           |           |            |             |             |  |
|              | 19_AYLAIQNMDNTATNLLFILPEQSEPETFIK     |                         | 1         |           |           |           |            |             |             |  |
|              | 55_GYGLFELQDCK                        | 1xCarbamidomethyl [C10] | 2         |           |           |           |            |             |             |  |
|              | 19_AYLAIQNMDNTATNLLFILPEQSEPETFIK     | 1xOxidation [M8]        | 2         |           |           |           |            |             |             |  |
|              | 1_MKIPVNTVIK                          | 1xOxidation [M1]        | 12        |           |           |           |            |             |             |  |
|              | 3_IPVNTVIK                            |                         | 3         |           |           |           |            |             |             |  |
|              | 1_MKIPVNTVIK                          |                         | 5         |           |           |           |            |             |             |  |
|              | 69_QKGEFYAYTTAPAGIDVR                 |                         | 2         |           |           |           |            |             |             |  |
|              | 49_SGFCIR                             | 1xCarbamidomethyl [C4]  | 6         |           |           |           |            |             |             |  |
| <b>ORF20</b> |                                       |                         | <b>35</b> | <b>55</b> | <b>10</b> | <b>10</b> | <b>247</b> | <b>26.3</b> | <b>High</b> |  |
|              | 81_FLTLTSGTLAGSSATR                   |                         | 3         |           |           |           |            |             |             |  |
|              | 22_GGEEGTAGLYACK                      | 1xCarbamidomethyl [C12] | 4         |           |           |           |            |             |             |  |
|              | 129_IACFGFAPAFNSLPISNR                | 1xCarbamidomethyl [C3]  | 3         |           |           |           |            |             |             |  |
|              | 152_SGNVWYCA YASQAVAVSSLPLGR          | 1xCarbamidomethyl [C7]  | 3         |           |           |           |            |             |             |  |
|              | 189_QEGSSNIDIVR                       |                         | 6         |           |           |           |            |             |             |  |
|              | 175_NLQSGDICTVR                       | 1xCarbamidomethyl [C8]  | 3         |           |           |           |            |             |             |  |
|              | 186_LDRQEGSSNIDIVR                    |                         | 6         |           |           |           |            |             |             |  |

|              |                                                       |                        |           |           |           |           |            |             |             |  |
|--------------|-------------------------------------------------------|------------------------|-----------|-----------|-----------|-----------|------------|-------------|-------------|--|
|              | 54_YLDGADNPDVWFPIPGGGGGTGVVYDNR                       |                        | 1         |           |           |           |            |             |             |  |
|              | 35_TILNEHR                                            |                        | 2         |           |           |           |            |             |             |  |
|              | 47_EYHLVGK                                            |                        | 4         |           |           |           |            |             |             |  |
| <b>ORF21</b> |                                                       |                        | <b>84</b> | <b>75</b> | <b>16</b> | <b>16</b> | <b>277</b> | <b>28.3</b> | <b>High</b> |  |
|              | 174_LPTGASTSTQYTLPSNVGDLLK                            |                        | 6         |           |           |           |            |             |             |  |
|              | 72_MINDPVISGSNEVIK                                    | 1xOxidation [M1]       | 11        |           |           |           |            |             |             |  |
|              | 109_ETDGLSSSLAQVFGTESQK                               |                        | 7         |           |           |           |            |             |             |  |
|              | 213_IGAYTPVSDPLQALK                                   |                        | 4         |           |           |           |            |             |             |  |
|              | 87_TNPEIPIDTTTKK                                      |                        | 9         |           |           |           |            |             |             |  |
|              | 151_SIGETVIGFLTDSYKESK                                |                        | 4         |           |           |           |            |             |             |  |
|              | 151_SIGETVIGFLTDSYK                                   |                        | 13        |           |           |           |            |             |             |  |
|              | 234_SSSGSSNSLTPK                                      |                        | 4         |           |           |           |            |             |             |  |
|              | 72_MINDPVISGSNEVIK                                    |                        | 5         |           |           |           |            |             |             |  |
|              | 213_IGAYTPVSDPLQALKDSGIVK                             |                        | 2         |           |           |           |            |             |             |  |
|              | 87_TNPEIPIDTTTK                                       |                        | 5         |           |           |           |            |             |             |  |
|              | 100_SALTSSTPK                                         |                        | 4         |           |           |           |            |             |             |  |
|              | 202_ASMQEAINQTK                                       |                        | 2         |           |           |           |            |             |             |  |
|              | 99_KSALTSSTPK                                         |                        | 4         |           |           |           |            |             |             |  |
|              | 26_TEDVGSNGNFGGLGGGGTLEGFEGVTDSGTP<br>YNISFPAVDPSPIIK |                        | 1         |           |           |           |            |             |             |  |
|              | 7_AIIGVGVIAAAYLMSGSK                                  |                        | 2         |           |           |           |            |             |             |  |
|              | 201_KASMQEAINQTK                                      |                        | 1         |           |           |           |            |             |             |  |
| <b>ORF22</b> |                                                       |                        | <b>62</b> | <b>52</b> | <b>15</b> | <b>15</b> | <b>334</b> | <b>37.9</b> | <b>High</b> |  |
|              | 244_LYIDGTSGDTEFK                                     |                        | 4         |           |           |           |            |             |             |  |
|              | 58_LDAWLEGCEGWIQSTR                                   | 1xCarbamidomethyl [C8] | 3         |           |           |           |            |             |             |  |
|              | 121_TISFLGSAVPGSYNIR                                  |                        | 4         |           |           |           |            |             |             |  |
|              | 57_RLDWLEGCEGWIQSTR                                   | 1xCarbamidomethyl      | 4         |           |           |           |            |             |             |  |

|  |                             |                                                 |   |  |  |  |  |  |  |
|--|-----------------------------|-------------------------------------------------|---|--|--|--|--|--|--|
|  |                             | yl [C9]                                         |   |  |  |  |  |  |  |
|  | 4_NLPSIYYVYANK              |                                                 | 4 |  |  |  |  |  |  |
|  | 47_IESYDIGDLR               |                                                 | 4 |  |  |  |  |  |  |
|  | 105_LLNFANAFK               |                                                 | 2 |  |  |  |  |  |  |
|  | 305_FTMDSVEHPYPAKPSPEPK     | 1xOxidation [M3]                                | 7 |  |  |  |  |  |  |
|  | 144_GSVANASATDNR            |                                                 | 4 |  |  |  |  |  |  |
|  | 305_FTMDSVEHPYPAKPSPEPK     |                                                 | 5 |  |  |  |  |  |  |
|  | 75_NEFNELETNLFDLK           |                                                 | 2 |  |  |  |  |  |  |
|  | 227_MVINCPDRPFVR            | 1xCarbamidometh<br>yl [C5];<br>1xOxidation [M1] | 7 |  |  |  |  |  |  |
|  | 98_LSTDSLK                  |                                                 | 5 |  |  |  |  |  |  |
|  | 16_TYEEI                    |                                                 | 4 |  |  |  |  |  |  |
|  | 23_AYLIENFSAVGQLNISNSSGCGFK | 1xCarbamidometh<br>yl [C21]                     | 1 |  |  |  |  |  |  |
|  | 47_IESYDIGDLRR              |                                                 | 2 |  |  |  |  |  |  |

**Table S4:** MSV ORF proteins identified via stacking gel SDS-PAGE – LC-MS analysis in Sample #2 (viral proteins extracted via filtration and washed). PSMs, peptide spectral matches; AAs, amino acid residues in ORF protein; MW, molecular weight; Protein FDR, protein level false discovery rate (high, FDR <1%).

| <b>Protein</b> | <b>Peptide Sequence</b> (prefix = location in protein) | <b>Modifications</b> | <b># PSMs</b> | <b>Coverage [%]</b> | <b># Peptides</b> | <b># Unique Peptides</b> | <b># AAs</b> | <b>MW [kDa]</b> | <b>Protein FDR</b> |
|----------------|--------------------------------------------------------|----------------------|---------------|---------------------|-------------------|--------------------------|--------------|-----------------|--------------------|
| <b>ORF5</b>    |                                                        |                      | <b>21</b>     | <b>61</b>           | <b>6</b>          | <b>6</b>                 | <b>92</b>    | <b>10.7</b>     | <b>High</b>        |
|                | 7_ITNYSLSFFK                                           |                      | 2             |                     |                   |                          |              |                 |                    |
|                | 7_ITNYSLSFFKDR                                         |                      | 4             |                     |                   |                          |              |                 |                    |
|                | 19_TGISINVTLSDGSTGTLQR                                 |                      | 4             |                     |                   |                          |              |                 |                    |
|                | 63_LVWGLYDMR                                           | 1xOxidation [M8]     | 5             |                     |                   |                          |              |                 |                    |
|                | 63_LVWGLYDMR                                           |                      | 1             |                     |                   |                          |              |                 |                    |
|                | 42_FNVMQ GK                                            |                      | 2             |                     |                   |                          |              |                 |                    |
|                | 54_MGYTHPDFK                                           |                      | 3             |                     |                   |                          |              |                 |                    |
| <b>ORF6</b>    |                                                        |                      | <b>68</b>     | <b>46</b>           | <b>10</b>         | <b>10</b>                | <b>244</b>   | <b>28.5</b>     | <b>High</b>        |
|                | 211_MIESWLQNFFK                                        |                      | 3             |                     |                   |                          |              |                 |                    |
|                | 211_MIESWLQNFFK                                        | 1xOxidation [M1]     | 3             |                     |                   |                          |              |                 |                    |
|                | 165_YDDDATDSEEIEGDDEAGGEK                              |                      | 6             |                     |                   |                          |              |                 |                    |
|                | 104_VMMPIVNVEQPQQIEEALPAAK                             |                      | 2             |                     |                   |                          |              |                 |                    |
|                | 104_VMMPIVNVEQPQQIEEALPAAK                             | 1xOxidation [M]      | 10            |                     |                   |                          |              |                 |                    |
|                | 104_VMMPIVNVEQPQQIEEALPAAK                             | 2xOxidation [M2; M3] | 6             |                     |                   |                          |              |                 |                    |
|                | 22_ANPDKSYNQLEK                                        |                      | 4             |                     |                   |                          |              |                 |                    |
|                | 45_QQMQEALR                                            |                      | 9             |                     |                   |                          |              |                 |                    |
|                | 27_SYNQLEK                                             |                      | 3             |                     |                   |                          |              |                 |                    |
|                | 6_ALSFNQK                                              |                      | 6             |                     |                   |                          |              |                 |                    |
|                | 13_MDAFLK                                              |                      | 9             |                     |                   |                          |              |                 |                    |



|              |                               |                        |           |           |           |           |            |             |             |  |
|--------------|-------------------------------|------------------------|-----------|-----------|-----------|-----------|------------|-------------|-------------|--|
|              | 44_RQQMQEALR                  |                        | 2         |           |           |           |            |             |             |  |
|              | 186_IFSGLINSNQYLDFMFPKPEDLANK |                        | 1         |           |           |           |            |             |             |  |
|              | 13_MDAFLK                     | 1xOxidation [M1]       | 4         |           |           |           |            |             |             |  |
| <b>ORF7</b>  |                               |                        | <b>72</b> | <b>40</b> | <b>13</b> | <b>13</b> | <b>359</b> | <b>41.2</b> | <b>High</b> |  |
|              | 40_ILYSGSNLISLSK              |                        | 3         |           |           |           |            |             |             |  |
|              | 215_KGEGLEVLLALLNNPR          |                        | 11        |           |           |           |            |             |             |  |
|              | 80_TSLEALGEAIGLKK             |                        | 3         |           |           |           |            |             |             |  |
|              | 328_YLLNSLYGK                 |                        | 6         |           |           |           |            |             |             |  |
|              | 140_VTIAGNALALFR              |                        | 3         |           |           |           |            |             |             |  |
|              | 263_TGTMEGYYNFPELR            | 1xOxidation [M4]       | 3         |           |           |           |            |             |             |  |
|              | 67_YYVTFLDSMNDFK              | 1xOxidation [M9]       | 3         |           |           |           |            |             |             |  |
|              | 317_AEGSCLELQVVK              | 1xCarbamidomethyl [C5] | 1         |           |           |           |            |             |             |  |
|              | 123_ALNIFFDVLR                |                        | 8         |           |           |           |            |             |             |  |
|              | 161_VNVELDNK                  |                        | 7         |           |           |           |            |             |             |  |
|              | 67_YYVTFLDSMNDFK              |                        | 2         |           |           |           |            |             |             |  |
|              | 207_YPNPQMLR                  |                        | 8         |           |           |           |            |             |             |  |
|              | 256_LYFPTSK                   |                        | 6         |           |           |           |            |             |             |  |
|              | 207_YPNPQMLR                  | 1xOxidation [M6]       | 4         |           |           |           |            |             |             |  |
|              | 169_FHLSYYGGR                 |                        | 4         |           |           |           |            |             |             |  |
| <b>ORF8</b>  |                               |                        | <b>15</b> | <b>42</b> | <b>4</b>  | <b>4</b>  | <b>79</b>  | <b>9.2</b>  | <b>High</b> |  |
|              | 41_IPVNFTEPASQSQLIR           |                        | 5         |           |           |           |            |             |             |  |
|              | 32_LWGIEELTR                  |                        | 3         |           |           |           |            |             |             |  |
|              | 72_VNPTTWK                    |                        | 6         |           |           |           |            |             |             |  |
|              | 31_KLWGIEELTR                 |                        | 1         |           |           |           |            |             |             |  |
| <b>ORF10</b> |                               |                        | <b>61</b> | <b>59</b> | <b>5</b>  | <b>5</b>  | <b>117</b> | <b>13.5</b> | <b>High</b> |  |
|              | 21_IKEQTGASESLITR             |                        | 24        |           |           |           |            |             |             |  |
|              | 4_TSDVIELLESGENDTAK           |                        | 6         |           |           |           |            |             |             |  |
|              | 49_QEEAKEEEEEPTDEEIDGIITK     |                        | 24        |           |           |           |            |             |             |  |
|              | 23_EQTGASESLITR               |                        | 6         |           |           |           |            |             |             |  |

|              |                                         |                             |            |           |           |           |            |             |             |  |
|--------------|-----------------------------------------|-----------------------------|------------|-----------|-----------|-----------|------------|-------------|-------------|--|
|              | 103_ASEMPVFCPGCGAEF                     | 2xCarbamidomethyl [C8; C11] | 1          |           |           |           |            |             |             |  |
| <b>ORF13</b> |                                         |                             | <b>57</b>  | <b>45</b> | <b>9</b>  | <b>9</b>  | <b>202</b> | <b>23.2</b> | <b>High</b> |  |
|              | 46_VLCLDPLNVIDGEIDAYR                   | 1xCarbamidomethyl [C3]      | 12         |           |           |           |            |             |             |  |
|              | 46_VLCLDPLNVIDGEIDAYRIPR                | 1xCarbamidomethyl [C3]      | 5          |           |           |           |            |             |             |  |
|              | 151_NIGVVMSTQRPASVDTGVIGLTDYLVLF        |                             | 3          |           |           |           |            |             |             |  |
|              | 151_NIGVVMSTQRPASVDTGVIGLTDYLVLF        | 1xOxidation [M6]            | 7          |           |           |           |            |             |             |  |
|              | 108_CDWLFALTFR                          | 1xCarbamidomethyl [C1]      | 3          |           |           |           |            |             |             |  |
|              | 91_NVVVYFNEMLR                          |                             | 1          |           |           |           |            |             |             |  |
|              | 91_NVVVYFNEMLR                          | 1xOxidation [M9]            | 3          |           |           |           |            |             |             |  |
|              | 21_TISIIGGK                             |                             | 10         |           |           |           |            |             |             |  |
|              | 38_MLLDQSK                              |                             | 3          |           |           |           |            |             |             |  |
|              | 38_MLLDQSK                              | 1xOxidation [M1]            | 5          |           |           |           |            |             |             |  |
|              | 38_MLLDQSKR                             | 1xOxidation [M1]            | 3          |           |           |           |            |             |             |  |
|              | 38_MLLDQSKR                             |                             | 1          |           |           |           |            |             |             |  |
|              | 46_VLCLDPLNVIDGEIDAYRIPRK               | 1xCarbamidomethyl [C3]      | 1          |           |           |           |            |             |             |  |
| <b>ORF15</b> |                                         |                             | <b>113</b> | <b>87</b> | <b>7</b>  | <b>7</b>  | <b>102</b> | <b>10.3</b> | <b>High</b> |  |
|              | 8_KAVTFESGSLWDSFAIGAVK                  |                             | 39         |           |           |           |            |             |             |  |
|              | 9_AVTFESGSLWDSFAIGAVK                   |                             | 19         |           |           |           |            |             |             |  |
|              | 50_GAAGVVIQSAIKGK                       |                             | 7          |           |           |           |            |             |             |  |
|              | 50_GAAGVVIQSAIK                         |                             | 34         |           |           |           |            |             |             |  |
|              | 67_IIGSAFAIDAVEDAVQALIVPIIDGGSDTGGNIDNW |                             | 4          |           |           |           |            |             |             |  |
|              | 1_MVDLVPK                               | 1xOxidation [M1]            | 6          |           |           |           |            |             |             |  |
|              | 33_AMIPVVGNGSLK                         | 1xOxidation [M2]            | 4          |           |           |           |            |             |             |  |
| <b>ORF16</b> |                                         |                             | <b>378</b> | <b>82</b> | <b>12</b> | <b>12</b> | <b>146</b> | <b>15.7</b> | <b>High</b> |  |
|              | 11_IVKTDASETVR                          |                             | 11         |           |           |           |            |             |             |  |
|              | 105_GVTAIAANGWVTIGSYTVPAQEEIR           |                             | 7          |           |           |           |            |             |             |  |
|              | 130_LGQSAENSR                           |                             | 25         |           |           |           |            |             |             |  |
|              | 41_LAPIVPMSQATLREDDKILVEYK              | 1xOxidation [M7]            | 34         |           |           |           |            |             |             |  |
|              | 41_LAPIVPMSQATLREDDKILVEYK              |                             | 27         |           |           |           |            |             |             |  |

|              |                                   |                         |           |           |           |           |            |             |             |
|--------------|-----------------------------------|-------------------------|-----------|-----------|-----------|-----------|------------|-------------|-------------|
|              | 41_LAPIVPMSQATLREDDK              | 1xOxidation [M7]        | 22        |           |           |           |            |             |             |
|              | 41_LAPIVPMSQATLREDDK              |                         | 14        |           |           |           |            |             |             |
|              | 41_LAPIVPMSQATLR                  | 1xOxidation [M7]        | 43        |           |           |           |            |             |             |
|              | 41_LAPIVPMSQATLR                  |                         | 14        |           |           |           |            |             |             |
|              | 22_QVLYETGSEIAVLGGSDPR            |                         | 23        |           |           |           |            |             |             |
|              | 88_TGNVAESFLR                     |                         | 51        |           |           |           |            |             |             |
|              | 64_TGTASQITGTSCSAR                | 1xCarbamidomethyl [C12] | 30        |           |           |           |            |             |             |
|              | 54_EDDKILVEYK                     |                         | 45        |           |           |           |            |             |             |
|              | 58_ILVEYK                         |                         | 17        |           |           |           |            |             |             |
|              | 98_SSDVFAR                        |                         | 15        |           |           |           |            |             |             |
| <b>ORF17</b> |                                   |                         | <b>14</b> | <b>36</b> | <b>2</b>  | <b>2</b>  | <b>55</b>  | <b>6.4</b>  | <b>High</b> |
|              | 34_IAVCLESVSLTLK                  | 1xCarbamidomethyl [C4]  | 4         |           |           |           |            |             |             |
|              | 47_DIKDDLK                        |                         | 10        |           |           |           |            |             |             |
| <b>ORF18</b> |                                   |                         | <b>6</b>  | <b>23</b> | <b>2</b>  | <b>2</b>  | <b>106</b> | <b>10.9</b> | <b>High</b> |
|              | 42_SYSIQYPTYQVQIDSPLASQTTK        |                         | 4         |           |           |           |            |             |             |
|              | 42_SYSIQYPTYQVQIDSPLASQTTKK       |                         | 2         |           |           |           |            |             |             |
| <b>ORF19</b> |                                   |                         | <b>85</b> | <b>83</b> | <b>7</b>  | <b>7</b>  | <b>90</b>  | <b>10.2</b> | <b>High</b> |
|              | 55_GYGLFELQDCK                    | 1xCarbamidomethyl [C10] | 4         |           |           |           |            |             |             |
|              | 69_QKGEFYAYTTAPAGIDVR             |                         | 9         |           |           |           |            |             |             |
|              | 71_GEFYAYTTAPAGIDVR               |                         | 11        |           |           |           |            |             |             |
|              | 19_AYLAIQNMDNTATNLLFILPEQSEPETFIK | 1xOxidation [M8]        | 3         |           |           |           |            |             |             |
|              | 1_MKIPVNTVIK                      |                         | 8         |           |           |           |            |             |             |
|              | 49_SGFCIR                         | 1xCarbamidomethyl [C4]  | 11        |           |           |           |            |             |             |
|              | 3_IPVNTVIK                        |                         | 5         |           |           |           |            |             |             |
| <b>ORF20</b> |                                   |                         | <b>72</b> | <b>55</b> | <b>10</b> | <b>10</b> | <b>247</b> | <b>26.3</b> | <b>High</b> |
|              | 129_IACFGFAPAFNSLPISNR            | 1xCarbamidomethyl [C3]  | 10        |           |           |           |            |             |             |
|              | 186_LDRQEGSSNIDIVR                |                         | 11        |           |           |           |            |             |             |
|              | 54_YLDGADNPDVWFPIPGGGGGTVVYDNR    |                         | 1         |           |           |           |            |             |             |
|              | 152_SGNVWYCAVASQAVAVSSLPLGR       | 1xCarbamidomethyl [C7]  | 4         |           |           |           |            |             |             |

|              |                            |                                             |            |           |           |           |            |             |             |
|--------------|----------------------------|---------------------------------------------|------------|-----------|-----------|-----------|------------|-------------|-------------|
|              | 175_NLQSGDICTVR            | 1xCarbamidomethyl [C8]                      | 8          |           |           |           |            |             |             |
|              | 189_QEGSSNIDIVR            |                                             | 12         |           |           |           |            |             |             |
|              | 81_FLTLTSGTLAGSSATR        |                                             | 6          |           |           |           |            |             |             |
|              | 22_GGEEGTAGLYACK           | 1xCarbamidomethyl [C12]                     | 9          |           |           |           |            |             |             |
|              | 35_TILNEHR                 |                                             | 5          |           |           |           |            |             |             |
|              | 47_EYHLVGK                 |                                             | 6          |           |           |           |            |             |             |
| <b>ORF21</b> |                            |                                             | <b>110</b> | <b>58</b> | <b>14</b> | <b>14</b> | <b>277</b> | <b>28.3</b> | <b>High</b> |
|              | 174_LPTGASTSTQYTLPSNVGDLLK |                                             | 11         |           |           |           |            |             |             |
|              | 72_MINDPVISGSNEVIK         |                                             | 6          |           |           |           |            |             |             |
|              | 72_MINDPVISGSNEVIK         | 1xOxidation [M1]                            | 18         |           |           |           |            |             |             |
|              | 213_IGAYTPVSDPLQALK        |                                             | 5          |           |           |           |            |             |             |
|              | 87_TNPEIPIDTTTK            |                                             | 8          |           |           |           |            |             |             |
|              | 87_TNPEIPIDTTKK            |                                             | 13         |           |           |           |            |             |             |
|              | 151_SIGETVIGFLTDSYKESK     |                                             | 4          |           |           |           |            |             |             |
|              | 151_SIGETVIGFLTDSYK        |                                             | 16         |           |           |           |            |             |             |
|              | 234_SSSGSSNSLTPK           |                                             | 5          |           |           |           |            |             |             |
|              | 109_ETDGSLSLSSLAQVFGTESQK  |                                             | 8          |           |           |           |            |             |             |
|              | 213_IGAYTPVSDPLQALKDSGIVK  |                                             | 2          |           |           |           |            |             |             |
|              | 100_SALTSSTPK              |                                             | 6          |           |           |           |            |             |             |
|              | 202_ASMQEAINQTK            |                                             | 3          |           |           |           |            |             |             |
|              | 129_TNDRGDYYATSAGGGAGAIK   |                                             | 1          |           |           |           |            |             |             |
|              | 99_KSALTSSTPK              |                                             | 4          |           |           |           |            |             |             |
| <b>ORF22</b> |                            |                                             | <b>139</b> | <b>52</b> | <b>16</b> | <b>16</b> | <b>334</b> | <b>37.9</b> | <b>High</b> |
|              | 105_LLNFTANAFK             |                                             | 5          |           |           |           |            |             |             |
|              | 227_MVINCPDRPFVR           | 1xCarbamidomethyl [C5]                      | 9          |           |           |           |            |             |             |
|              | 227_MVINCPDRPFVR           | 1xCarbamidomethyl [C5];<br>1xOxidation [M1] | 14         |           |           |           |            |             |             |
|              | 75_NEFNELETNLFDLDK         |                                             | 2          |           |           |           |            |             |             |
|              | 244_LYIDGTSGDTFK           |                                             | 11         |           |           |           |            |             |             |

|                             |                         |    |  |  |  |  |  |  |  |
|-----------------------------|-------------------------|----|--|--|--|--|--|--|--|
| 47_IESYDIGDLRR              |                         | 6  |  |  |  |  |  |  |  |
| 47_IESYDIGDLR               |                         | 9  |  |  |  |  |  |  |  |
| 58_LDAWLEGCEGWIQSTR         | 1xCarbamidomethyl [C8]  | 4  |  |  |  |  |  |  |  |
| 57_RLDAWLEGCEGWIQSTR        | 1xCarbamidomethyl [C9]  | 8  |  |  |  |  |  |  |  |
| 74_RNEFNELETNLFDLK          |                         | 5  |  |  |  |  |  |  |  |
| 4_NLPSIYYVYANK              |                         | 7  |  |  |  |  |  |  |  |
| 121_TISFLGSAVPGSYNIR        |                         | 9  |  |  |  |  |  |  |  |
| 305_FTMDSVEHPYPAKPSPEPK     | 1xOxidation [M3]        | 13 |  |  |  |  |  |  |  |
| 305_FTMDSVEHPYPAKPSPEPK     |                         | 9  |  |  |  |  |  |  |  |
| 144_GSVPANASATDNR           |                         | 6  |  |  |  |  |  |  |  |
| 16_TYEEEIK                  |                         | 9  |  |  |  |  |  |  |  |
| 98_LSTDCLK                  |                         | 12 |  |  |  |  |  |  |  |
| 23_AYLIENFSAVGQLNISNSSGCGFK | 1xCarbamidomethyl [C21] | 1  |  |  |  |  |  |  |  |

**Table S5A:** MetSV ORF proteins identified in protein band 71 via tryptic digestion. PSMs, peptide spectral matches; AAs, amino acid residues in ORF protein; MW, molecular weight; Protein FDR, protein level false discovery rate (high, FDR <1%).

| <b>Protein</b> | <b>Peptide Sequence</b> (prefix = location in protein) | <b>Modifications</b> | <b># PSMs</b> | <b>Coverage [%]</b> | <b># Peptides</b> | <b># Unique Peptides</b> | <b># AAs</b> | <b>MW [kDa]</b> | <b>Protein FDR</b> |
|----------------|--------------------------------------------------------|----------------------|---------------|---------------------|-------------------|--------------------------|--------------|-----------------|--------------------|
| <b>ORF1</b>    |                                                        |                      | <b>7</b>      | <b>40</b>           | <b>3</b>          | <b>3</b>                 | <b>55</b>    | <b>6.5</b>      | <b>High</b>        |
|                | 28_KDPETEAALLMSR                                       | 1xOxidation [M12]    | 1             |                     |                   |                          |              |                 |                    |
|                | 1_MIHITGDK                                             | 1xOxidation [M1]     | 4             |                     |                   |                          |              |                 |                    |
|                | 1_MIHITGDK                                             |                      | 1             |                     |                   |                          |              |                 |                    |
|                | 29_DPETEAALLMSR                                        | 1xOxidation [M11]    | 1             |                     |                   |                          |              |                 |                    |
| <b>ORF2</b>    |                                                        |                      | <b>3</b>      | <b>76</b>           | <b>3</b>          | <b>3</b>                 | <b>41</b>    | <b>5</b>        | <b>High</b>        |
|                | 16_FNTFLNTPLWEDDLTK                                    |                      | 1             |                     |                   |                          |              |                 |                    |
|                | 1_MFNSITNK                                             | 1xOxidation [M1]     | 1             |                     |                   |                          |              |                 |                    |
|                | 9_IYSLMTR                                              | 1xOxidation [M5]     | 1             |                     |                   |                          |              |                 |                    |
| <b>ORF5</b>    |                                                        |                      | <b>9</b>      | <b>49</b>           | <b>4</b>          | <b>4</b>                 | <b>92</b>    | <b>10.7</b>     | <b>High</b>        |
|                | 54_MGYTHPDFK                                           | 1xOxidation [M1]     | 3             |                     |                   |                          |              |                 |                    |
|                | 19_TGISINVTLSDGSTGTLQR                                 |                      | 1             |                     |                   |                          |              |                 |                    |
|                | 54_MGYTHPDFK                                           |                      | 1             |                     |                   |                          |              |                 |                    |
|                | 7_ITNYSLSFFK                                           |                      | 3             |                     |                   |                          |              |                 |                    |
|                | 42_FNVMQGK                                             | 1xOxidation [M4]     | 1             |                     |                   |                          |              |                 |                    |
| <b>ORF8</b>    |                                                        |                      | <b>5</b>      | <b>42</b>           | <b>4</b>          | <b>4</b>                 | <b>79</b>    | <b>9.2</b>      | <b>High</b>        |
|                | 41_IPVNFTEPASQSQLIR                                    |                      | 1             |                     |                   |                          |              |                 |                    |
|                | 32_LWGIEELTR                                           |                      | 1             |                     |                   |                          |              |                 |                    |
|                | 31_KLWGIEELTR                                          |                      | 1             |                     |                   |                          |              |                 |                    |
|                | 72_VNPTTWK                                             |                      | 2             |                     |                   |                          |              |                 |                    |

|              |                                  |                  |            |            |           |           |            |             |             |
|--------------|----------------------------------|------------------|------------|------------|-----------|-----------|------------|-------------|-------------|
| <b>ORF9</b>  |                                  |                  | <b>7</b>   | <b>53</b>  | <b>4</b>  | <b>4</b>  | <b>62</b>  | <b>7.7</b>  | <b>High</b> |
|              | 45_LLELVFDYR                     |                  | 2          |            |           |           |            |             |             |
|              | 4_QDIENLIK                       |                  | 2          |            |           |           |            |             |             |
|              | 34_EQEYIQEEK                     |                  | 1          |            |           |           |            |             |             |
|              | 12_LKEEYIK                       |                  | 2          |            |           |           |            |             |             |
| <b>ORF10</b> |                                  |                  | <b>2</b>   | <b>12</b>  | <b>2</b>  | <b>2</b>  | <b>117</b> | <b>13.5</b> | <b>High</b> |
|              | 23_EQTGASESLITR                  |                  | 1          |            |           |           |            |             |             |
|              | 21_IKEQTGASESLITR                |                  | 1          |            |           |           |            |             |             |
| <b>ORF11</b> |                                  |                  | <b>2</b>   | <b>36</b>  | <b>2</b>  | <b>2</b>  | <b>47</b>  | <b>5.8</b>  | <b>High</b> |
|              | 19_TALIFNEK                      |                  | 1          |            |           |           |            |             |             |
|              | 30_TYHFDQTIR                     |                  | 1          |            |           |           |            |             |             |
| <b>ORF13</b> |                                  |                  | <b>2</b>   | <b>7</b>   | <b>2</b>  | <b>2</b>  | <b>202</b> | <b>23.2</b> | <b>High</b> |
|              | 21_TISIIGGK                      |                  | 1          |            |           |           |            |             |             |
|              | 38_MLLDQSK                       | 1xOxidation [M1] | 1          |            |           |           |            |             |             |
| <b>ORF15</b> |                                  |                  | <b>266</b> | <b>100</b> | <b>14</b> | <b>14</b> | <b>102</b> | <b>10.3</b> | <b>High</b> |
|              | 50_GAAGVVIQSAIKGKTGK             |                  | 1          |            |           |           |            |             |             |
|              | 50_GAAGVVIQSAIKGK                |                  | 1          |            |           |           |            |             |             |
|              | 8_KAVTFESGSLWDSFAIGAVKAIEER      |                  | 1          |            |           |           |            |             |             |
|              | 8_KAVTFESGSLWDSFAIGAVK           |                  | 4          |            |           |           |            |             |             |
|              | 50_GAAGVVIQSAIK                  |                  | 138        |            |           |           |            |             |             |
|              | 45_SAVAKGAAGVVIQSAIKGK           |                  | 3          |            |           |           |            |             |             |
|              | 45_SAVAKGAAGVVIQSAIK             |                  | 2          |            |           |           |            |             |             |
|              | 9_AVTFESGSLWDSFAIGAVKAIEER       |                  | 1          |            |           |           |            |             |             |
|              | 9_AVTFESGSLWDSFAIGAVK            |                  | 79         |            |           |           |            |             |             |
|              | 33_AMIPVVGNGSLKSAVAKGAAGVVIQSAIK |                  | 2          |            |           |           |            |             |             |
|              | 33_AMIPVVGNGSLKSAVAKGAAGVVIQSAIK | 1xOxidation [M2] | 1          |            |           |           |            |             |             |
|              | 33_AMIPVVGNGSLKSAVAK             | 1xOxidation [M2] | 3          |            |           |           |            |             |             |
|              | 33_AMIPVVGNGSLKSAVAK             |                  | 1          |            |           |           |            |             |             |
|              | 33_AMIPVVGNGSLK                  | 1xOxidation [M2] | 5          |            |           |           |            |             |             |

|              |                                         |                         |           |           |          |          |            |             |             |  |
|--------------|-----------------------------------------|-------------------------|-----------|-----------|----------|----------|------------|-------------|-------------|--|
|              | 1_MVDLVPK                               | 1xOxidation [M1]        | 11        |           |          |          |            |             |             |  |
|              | 33_AMIPVVGNGSLK                         |                         | 6         |           |          |          |            |             |             |  |
|              | 67_IIGSAFAIDAVEDAVQALIVPIIDGGSDTGGNIDNW |                         | 2         |           |          |          |            |             |             |  |
|              | 1_MVDLVPK                               |                         | 5         |           |          |          |            |             |             |  |
| <b>ORF16</b> |                                         |                         | <b>32</b> | <b>75</b> | <b>9</b> | <b>9</b> | <b>146</b> | <b>15.7</b> | <b>High</b> |  |
|              | 130_LGQSAENSR                           |                         | 4         |           |          |          |            |             |             |  |
|              | 105_GVTAIAANGWVTIGSYTVPAQEEIR           |                         | 4         |           |          |          |            |             |             |  |
|              | 41_LAPIVPMSQATLR                        |                         | 3         |           |          |          |            |             |             |  |
|              | 64_TGTASQITGTSCSAR                      | 1xCarbamidomethyl [C12] | 3         |           |          |          |            |             |             |  |
|              | 88_TGNVAESFLR                           |                         | 5         |           |          |          |            |             |             |  |
|              | 22_QVLYETGSEIAVLGGSDPR                  |                         | 3         |           |          |          |            |             |             |  |
|              | 54_EDDKILVEYK                           |                         | 2         |           |          |          |            |             |             |  |
|              | 58_ILVEYK                               |                         | 4         |           |          |          |            |             |             |  |
|              | 41_LAPIVPMSQATLR                        | 1xOxidation [M7]        | 3         |           |          |          |            |             |             |  |
|              | 98_SSDVFAR                              |                         | 1         |           |          |          |            |             |             |  |
| <b>ORF17</b> |                                         |                         | <b>4</b>  | <b>36</b> | <b>2</b> | <b>2</b> | <b>55</b>  | <b>6.4</b>  | <b>High</b> |  |
|              | 34_IAVCLESVSLTLK                        | 1xCarbamidomethyl [C4]  | 1         |           |          |          |            |             |             |  |
|              | 47_DIKDDLK                              |                         | 3         |           |          |          |            |             |             |  |
| <b>ORF19</b> |                                         |                         | <b>73</b> | <b>86</b> | <b>7</b> | <b>7</b> | <b>90</b>  | <b>10.2</b> | <b>High</b> |  |
|              | 1_MKIPVNTVIK                            | 1xOxidation [M1]        | 7         |           |          |          |            |             |             |  |
|              | 55_GYGLFELQDCK                          | 1xCarbamidomethyl [C10] | 4         |           |          |          |            |             |             |  |
|              | 71_GEFYAYTTAPAGIDVR                     |                         | 6         |           |          |          |            |             |             |  |
|              | 69_QKGEFYAYTTAPAGIDVR                   |                         | 3         |           |          |          |            |             |             |  |
|              | 19_AYLAIQNMDNTATNLLFILPEQSEPETFIK       |                         | 6         |           |          |          |            |             |             |  |
|              | 19_AYLAIQNMDNTATNLLFILPEQSEPETFIK       | 1xOxidation [M8]        | 3         |           |          |          |            |             |             |  |
|              | 3_IPVNTVIK                              |                         | 36        |           |          |          |            |             |             |  |
|              | 1_MKIPVNTVIK                            |                         | 3         |           |          |          |            |             |             |  |
|              | 11_LVRPNIDR                             |                         | 5         |           |          |          |            |             |             |  |
| <b>ORF20</b> |                                         |                         | <b>5</b>  | <b>28</b> | <b>5</b> | <b>5</b> | <b>247</b> | <b>26.3</b> | <b>High</b> |  |



|              |                                |                         |          |           |          |          |            |             |             |
|--------------|--------------------------------|-------------------------|----------|-----------|----------|----------|------------|-------------|-------------|
|              | 22_GGEEGTAGLYACK               | 1xCarbamidomethyl [C12] | 1        |           |          |          |            |             |             |
|              | 54_YLDGADNPDVWFPIPGGGGGTVVYDNR |                         | 1        |           |          |          |            |             |             |
|              | 189_QEGSSNIDIVR                |                         | 1        |           |          |          |            |             |             |
|              | 175_NLQSGDICTVR                | 1xCarbamidomethyl [C8]  | 1        |           |          |          |            |             |             |
|              | 47_EYHLVGK                     |                         | 1        |           |          |          |            |             |             |
| <b>ORF21</b> |                                |                         | <b>3</b> | <b>17</b> | <b>3</b> | <b>3</b> | <b>277</b> | <b>28.3</b> | <b>High</b> |
|              | 213_IGAYTPVSDPLQALK            |                         | 1        |           |          |          |            |             |             |
|              | 7_AIIGVGVIAAAYLYMSGSK          |                         | 1        |           |          |          |            |             |             |
|              | 87_TNPEIPIDTTTK                |                         | 1        |           |          |          |            |             |             |
| <b>ORF22</b> |                                |                         | <b>6</b> | <b>16</b> | <b>5</b> | <b>5</b> | <b>334</b> | <b>37.9</b> | <b>High</b> |
|              | 75_NEFNELETNLFDLDK             |                         | 1        |           |          |          |            |             |             |
|              | 4_NLPSIYYVYANK                 |                         | 1        |           |          |          |            |             |             |
|              | 74_RNEFNELETNLFDLDK            |                         | 2        |           |          |          |            |             |             |
|              | 305_FTMDSVEHPYPAKPSPEPK        | 1xOxidation [M3]        | 1        |           |          |          |            |             |             |
|              | 16_TYEEEIK                     |                         | 1        |           |          |          |            |             |             |

**Table S5B:** MetSV ORF proteins identified in protein band 73 via GluC digestion. PSMs, peptide spectral matches; AAs, amino acid residues in ORF protein; MW, molecular weight; Protein FDR, protein level false discovery rate (high, FDR <1%).

| Protein      | Peptide Sequence (prefix = location in protein) | Modifications                                      | # PSMs     | Coverage [%] | # Peptides | # Unique Peptides | # AAs      | MW [kDa]    | Protein FDR |
|--------------|-------------------------------------------------|----------------------------------------------------|------------|--------------|------------|-------------------|------------|-------------|-------------|
| <b>ORF1</b>  |                                                 |                                                    | <b>3</b>   | <b>25</b>    | <b>1</b>   | <b>1</b>          | <b>55</b>  | <b>6.5</b>  | <b>High</b> |
|              | 34_AALLMSRCRLKHE                                | 1xCarbamidomethyl [C9];<br>1xOxidation [M6]        | 2          |              |            |                   |            |             |             |
|              | 34_AALLMSRCRLKHE                                | 1xCarbamidomethyl [C9]                             | 1          |              |            |                   |            |             |             |
| <b>ORF4</b>  |                                                 |                                                    | <b>2</b>   | <b>73</b>    | <b>2</b>   | <b>2</b>          | <b>41</b>  | <b>4.8</b>  | <b>High</b> |
|              | 33_RTLSSFGRC                                    | 1xCarbamidomethyl [C9]                             | 1          |              |            |                   |            |             |             |
|              | 9_VNRGKSSHLLFKPCNCKTKE                          | 2xCarbamidomethyl [C13;<br>C16]; 1xOxidation [M17] | 1          |              |            |                   |            |             |             |
| <b>ORF9</b>  |                                                 |                                                    | <b>2</b>   | <b>13</b>    | <b>2</b>   | <b>2</b>          | <b>62</b>  | <b>7.7</b>  | <b>High</b> |
|              | 8_NLIKLKE                                       |                                                    | 1          |              |            |                   |            |             |             |
|              | 8_NLIKLKEE                                      |                                                    | 1          |              |            |                   |            |             |             |
| <b>ORF13</b> |                                                 |                                                    | <b>3</b>   | <b>10</b>    | <b>2</b>   | <b>2</b>          | <b>202</b> | <b>23.2</b> | <b>High</b> |
|              | 130_FTPHFTGSKE                                  |                                                    | 2          |              |            |                   |            |             |             |
|              | 192_LLKYRIADKE                                  |                                                    | 1          |              |            |                   |            |             |             |
| <b>ORF15</b> |                                                 |                                                    | <b>191</b> | <b>100</b>   | <b>13</b>  | <b>13</b>         | <b>102</b> | <b>10.3</b> | <b>High</b> |
|              | 4_LVPKKAVTFE                                    |                                                    | 21         |              |            |                   |            |             |             |
|              | 1_MVDLVPKKAVTFE                                 | 1xOxidation [M1]                                   | 13         |              |            |                   |            |             |             |
|              | 1_MVDLVPKKAVTFE                                 |                                                    | 8          |              |            |                   |            |             |             |
|              | 20_SFAIGAVKAIE                                  |                                                    | 1          |              |            |                   |            |             |             |
|              | 20_SFAIGAVKAIEE                                 |                                                    | 120        |              |            |                   |            |             |             |
|              | 14_SGSLWDSFAIGAVKAIE                            |                                                    | 1          |              |            |                   |            |             |             |
|              | 14_SGSLWDSFAIGAVKAIEE                           |                                                    | 16         |              |            |                   |            |             |             |

|              |                                                         |                        |           |           |          |          |            |             |             |
|--------------|---------------------------------------------------------|------------------------|-----------|-----------|----------|----------|------------|-------------|-------------|
|              | 80_AVQALIVPIIDGGSD                                      |                        | 2         |           |          |          |            |             |             |
|              | 80_AVQALIVPIIDGGSDTGGNID                                |                        | 1         |           |          |          |            |             |             |
|              | 79_DAVQALIVPIID                                         |                        | 2         |           |          |          |            |             |             |
|              | 91_GGSDTGGNIDNW                                         |                        | 1         |           |          |          |            |             |             |
|              | 80_AVQALIVPIID                                          |                        | 2         |           |          |          |            |             |             |
|              | 32_RAMIPVVGNGSLKSAVAKGAAGVVIQSAIKGKT<br>GKIIGSAFAIDAVED | 1xOxidation [M3]       | 2         |           |          |          |            |             |             |
|              | 32_RAMIPVVGNGSLKSAVAKGAAGVVIQSAIKGKT<br>GKIIGSAFAIDAVE  |                        | 1         |           |          |          |            |             |             |
| <b>ORF16</b> |                                                         |                        | <b>16</b> | <b>31</b> | <b>5</b> | <b>5</b> | <b>146</b> | <b>15.7</b> | <b>High</b> |
|              | 39_PRLAPIVPMSQATLRE                                     |                        | 1         |           |          |          |            |             |             |
|              | 39_PRLAPIVPMSQATLRE                                     | 1xOxidation [M9]       | 4         |           |          |          |            |             |             |
|              | 6_AGDIRIVKTDASE                                         |                        | 2         |           |          |          |            |             |             |
|              | 31_IAVLGGSDPRLAPIVPMSQATLRE                             | 1xOxidation [M17]      | 6         |           |          |          |            |             |             |
|              | 31_IAVLGGSDPRLAPIVPMSQATLRED                            |                        | 1         |           |          |          |            |             |             |
|              | 31_IAVLGGSDPRLAPIVPMSQATLRE                             |                        | 1         |           |          |          |            |             |             |
|              | 94_SFLRSSD                                              |                        | 1         |           |          |          |            |             |             |
| <b>ORF19</b> |                                                         |                        | <b>19</b> | <b>70</b> | <b>5</b> | <b>5</b> | <b>90</b>  | <b>10.2</b> | <b>High</b> |
|              | 1_MKIPVNTVIKLVRPNID                                     | 1xOxidation [M1]       | 3         |           |          |          |            |             |             |
|              | 1_MKIPVNTVIKLVRPNID                                     |                        | 1         |           |          |          |            |             |             |
|              | 45_TFIKSGFCIRGYGLFE                                     | 1xCarbamidomethyl [C8] | 2         |           |          |          |            |             |             |
|              | 73_FYAYTTAPAGIDVRVLE                                    |                        | 8         |           |          |          |            |             |             |
|              | 73_FYAYTTAPAGIDVRVLEL                                   |                        | 3         |           |          |          |            |             |             |
|              | 28_NTATNLLFILPE                                         |                        | 2         |           |          |          |            |             |             |
| <b>ORF20</b> |                                                         |                        | <b>2</b>  | <b>10</b> | <b>2</b> | <b>2</b> | <b>247</b> | <b>26.3</b> | <b>High</b> |
|              | 15_VLALINRGEE                                           |                        | 1         |           |          |          |            |             |             |
|              | 26_GTAGLYACKTILNE                                       | 1xCarbamidomethyl [C8] | 1         |           |          |          |            |             |             |

**Table S6A:** MetSV ORF proteins identified in protein band 70 via tryptic digestion. PSMs, peptide spectral matches; AAs, amino acid residues in ORF protein; MW, molecular weight; Protein FDR, protein level false discovery rate (high, FDR <1%).

| <b>Protein</b> | <b>Peptide Sequence</b> (prefix = location in protein) | <b>Modifications</b>    | <b># PSMs</b> | <b>Coverage [%]</b> | <b># Peptides</b> | <b># Unique Peptides</b> | <b># AAs</b> | <b>MW [kDa]</b> | <b>Protein FDR</b> |
|----------------|--------------------------------------------------------|-------------------------|---------------|---------------------|-------------------|--------------------------|--------------|-----------------|--------------------|
| <b>ORF10</b>   |                                                        |                         | <b>4</b>      | <b>30</b>           | <b>3</b>          | <b>3</b>                 | <b>117</b>   | <b>13.5</b>     | <b>High</b>        |
|                | 49_QEEAKEEEEEPTDEEIDGIITK                              |                         | 2             |                     |                   |                          |              |                 |                    |
|                | 54_EEEEEPTDEEIDGIITK                                   |                         | 1             |                     |                   |                          |              |                 |                    |
|                | 23_EQTGASESLTR                                         |                         | 1             |                     |                   |                          |              |                 |                    |
| <b>ORF13</b>   |                                                        |                         | <b>2</b>      | <b>9</b>            | <b>2</b>          | <b>2</b>                 | <b>202</b>   | <b>23.2</b>     | <b>High</b>        |
|                | 108_CDWLFPALTFR                                        | 1xCarbamidomethyl [C1]  | 1             |                     |                   |                          |              |                 |                    |
|                | 21_TISIIGGK                                            |                         | 1             |                     |                   |                          |              |                 |                    |
| <b>ORF15</b>   |                                                        |                         | <b>3</b>      | <b>24</b>           | <b>2</b>          | <b>2</b>                 | <b>102</b>   | <b>10.3</b>     | <b>High</b>        |
|                | 50_GAAGVVIQSAIK                                        |                         | 2             |                     |                   |                          |              |                 |                    |
|                | 33_AMIPVVGNGSLK                                        | 1xOxidation [M2]        | 1             |                     |                   |                          |              |                 |                    |
| <b>ORF16</b>   |                                                        |                         | <b>739</b>    | <b>94</b>           | <b>21</b>         | <b>21</b>                | <b>146</b>   | <b>15.7</b>     | <b>High</b>        |
|                | 1_MAATDAGDIR                                           |                         | 1             |                     |                   |                          |              |                 |                    |
|                | 22_QVLYETGSEIAVLGGSDPR                                 |                         | 99            |                     |                   |                          |              |                 |                    |
|                | 58_ILVEYKTGTASQITGTSCSAR                               | 1xCarbamidomethyl [C18] | 1             |                     |                   |                          |              |                 |                    |
|                | 130_LGQSIAENSR                                         |                         | 63            |                     |                   |                          |              |                 |                    |
|                | 11_IVKTDASETVRQVLYETGSEIAVLGGSDPR                      |                         | 1             |                     |                   |                          |              |                 |                    |
|                | 11_IVKTDASETVR                                         |                         | 3             |                     |                   |                          |              |                 |                    |
|                | 98_SSDVFAR                                             |                         | 5             |                     |                   |                          |              |                 |                    |
|                | 98_SSDVFARGVTAIAANGWVTIGSYTVPAQEEIR                    |                         | 2             |                     |                   |                          |              |                 |                    |
|                | 64_TGTASQITGTSCSAR                                     | 1xCarbamidomethyl [C12] | 78            |                     |                   |                          |              |                 |                    |

|              |                                |                         |          |           |          |          |            |             |             |
|--------------|--------------------------------|-------------------------|----------|-----------|----------|----------|------------|-------------|-------------|
|              | 88_TGNVAESFLRSSDV FAR          |                         | 1        |           |          |          |            |             |             |
|              | 88_TGNVAESFLR                  |                         | 139      |           |          |          |            |             |             |
|              | 14_TDASETVRQVLYETGSEIAVLGGSDPR |                         | 3        |           |          |          |            |             |             |
|              | 14_TDASETVR                    |                         | 3        |           |          |          |            |             |             |
|              | 58_ILVEYK                      |                         | 123      |           |          |          |            |             |             |
|              | 54_EDDKILVEYKTGTASQITGTSCSAR   | 1xCarbamidomethyl [C22] | 2        |           |          |          |            |             |             |
|              | 54_EDDKILVEYK                  |                         | 11       |           |          |          |            |             |             |
|              | 105_GVTAIAANGWVTIGSYTVPAQEEIR  |                         | 10       |           |          |          |            |             |             |
|              | 41_LAPIVPMSQATLREDDKILVEYK     | 1xOxidation [M7]        | 1        |           |          |          |            |             |             |
|              | 41_LAPIVPMSQATLREDDK           |                         | 1        |           |          |          |            |             |             |
|              | 41_LAPIVPMSQATLR               | 1xOxidation [M7]        | 119      |           |          |          |            |             |             |
|              | 41_LAPIVPMSQATLR               |                         | 72       |           |          |          |            |             |             |
|              | 130_LGQSAENSRLYFNLVE           |                         | 1        |           |          |          |            |             |             |
| <b>ORF20</b> |                                |                         | <b>3</b> | <b>15</b> | <b>3</b> | <b>3</b> | <b>247</b> | <b>26.3</b> | <b>High</b> |
|              | 22_GGEEGTAGLYACK               | 1xCarbamidomethyl [C12] | 1        |           |          |          |            |             |             |
|              | 81_FLTLTSGTLAGSSATR            |                         | 1        |           |          |          |            |             |             |
|              | 47_EYHLVGK                     |                         | 1        |           |          |          |            |             |             |
| <b>ORF21</b> |                                |                         | <b>5</b> | <b>22</b> | <b>4</b> | <b>4</b> | <b>277</b> | <b>28.3</b> | <b>High</b> |
|              | 87_TNPEIPIDTTTK                |                         | 1        |           |          |          |            |             |             |
|              | 151_SIGETVIGFLTDSYK            |                         | 2        |           |          |          |            |             |             |
|              | 109_ETDGLSSSLAQVFGTESQK        |                         | 1        |           |          |          |            |             |             |
|              | 213_IGAYTPVSDPLQALK            |                         | 1        |           |          |          |            |             |             |

**Table S6 B:** MetSV ORF proteins identified in protein band 72 via GluC digestion. PSMs, peptide spectral matches; AAs, amino acid residues in ORF protein; MW, molecular weight; Protein FDR, protein level false discovery rate (high, FDR <1%).

| <b>Protein</b> | <b>Peptide Sequence</b> (prefix = location in protein) | <b>Modifications</b>    | <b># PSMs</b> | <b>Coverage [%]</b> | <b># Peptides</b> | <b># Unique Peptides</b> | <b># AAs</b> | <b>MW [kDa]</b> | <b>Protein FDR</b> |
|----------------|--------------------------------------------------------|-------------------------|---------------|---------------------|-------------------|--------------------------|--------------|-----------------|--------------------|
| <b>ORF15</b>   |                                                        |                         | <b>3</b>      | <b>18</b>           | <b>2</b>          | <b>2</b>                 | <b>102</b>   | <b>10.3</b>     | <b>High</b>        |
|                | 20_SFAIGAVKAIEE                                        |                         | 2             |                     |                   |                          |              |                 |                    |
|                | 14_SGSLWDSFAIGAVKAIEE                                  |                         | 1             |                     |                   |                          |              |                 |                    |
| <b>ORF16</b>   |                                                        |                         | <b>818</b>    | <b>97</b>           | <b>24</b>         | <b>24</b>                | <b>146</b>   | <b>15.7</b>     | <b>High</b>        |
|                | 137_NSRLYFNLVE                                         |                         | 97            |                     |                   |                          |              |                 |                    |
|                | 39_PRLAPIVPMSQATLRE                                    |                         | 53            |                     |                   |                          |              |                 |                    |
|                | 39_PRLAPIVPMSQATLRE                                    | 1xOxidation [M9]        | 94            |                     |                   |                          |              |                 |                    |
|                | 39_PRLAPIVPMSQATLRED                                   |                         | 1             |                     |                   |                          |              |                 |                    |
|                | 39_PRLAPIVPMSQATLREDD                                  |                         | 1             |                     |                   |                          |              |                 |                    |
|                | 39_PRLAPIVPMSQATLREDD                                  | 1xOxidation [M9]        | 2             |                     |                   |                          |              |                 |                    |
|                | 39_PRLAPIVPMSQATLRED                                   | 1xOxidation [M9]        | 1             |                     |                   |                          |              |                 |                    |
|                | 94_SFLRSSD                                             |                         | 5             |                     |                   |                          |              |                 |                    |
|                | 94_SFLRSSDVFARGVTAIAANGWVTIGSYTVPAQE                   |                         | 4             |                     |                   |                          |              |                 |                    |
|                | 62_YKTGTASQITGTSCSARIPRRKNVRTGNVAE                     | 1xCarbamidomethyl [C14] | 41            |                     |                   |                          |              |                 |                    |
|                | 94_SFLRSSDVFARGVTAIAANGWVTIGSYTVPAQEE                  |                         | 11            |                     |                   |                          |              |                 |                    |
|                | 27_TGSEIAVLGGSD                                        |                         | 1             |                     |                   |                          |              |                 |                    |
|                | 27_TGSEIAVLGGSDPRLAPIVPMSQATLRE                        |                         | 1             |                     |                   |                          |              |                 |                    |
|                | 19_TVRQVLYE                                            |                         | 130           |                     |                   |                          |              |                 |                    |
|                | 19_TVRQVLYETGSE                                        |                         | 1             |                     |                   |                          |              |                 |                    |
|                | 101_VFARGVTAIAANGWVTIGSYTVPAQE                         |                         | 1             |                     |                   |                          |              |                 |                    |
|                | 101_VFARGVTAIAANGWVTIGSYTVPAQEE                        |                         | 7             |                     |                   |                          |              |                 |                    |

|              |                              |                   |          |           |          |          |            |             |             |
|--------------|------------------------------|-------------------|----------|-----------|----------|----------|------------|-------------|-------------|
|              | 9_IRIVKTDASE                 |                   | 6        |           |          |          |            |             |             |
|              | 127_EIRLGQSIAE               |                   | 8        |           |          |          |            |             |             |
|              | 127_EIRLGQSIAENSRLYFNLVE     |                   | 1        |           |          |          |            |             |             |
|              | 6_AGDIRIVKTDASE              |                   | 6        |           |          |          |            |             |             |
|              | 16_ASETVRQVLYE               |                   | 1        |           |          |          |            |             |             |
|              | 31_IAVLGGSDPRLAPIVPMSQATLRED | 1xOxidation [M17] | 9        |           |          |          |            |             |             |
|              | 128_IRLGQSIAE                |                   | 103      |           |          |          |            |             |             |
|              | 31_IAVLGGSDPRLAPIVPMSQATLRED |                   | 3        |           |          |          |            |             |             |
|              | 31_IAVLGGSDPRLAPIVPMSQATLRE  | 1xOxidation [M17] | 119      |           |          |          |            |             |             |
|              | 31_IAVLGGSDPRLAPIVPMSQATLRE  |                   | 106      |           |          |          |            |             |             |
|              | 128_IRLGQSIAENSRLYFNLVE      |                   | 1        |           |          |          |            |             |             |
|              | 55_DDKILVE                   |                   | 4        |           |          |          |            |             |             |
| <b>ORF21</b> |                              |                   | <b>2</b> | <b>12</b> | <b>2</b> | <b>2</b> | <b>277</b> | <b>28.3</b> | <b>High</b> |
|              | 155_TVIGFLTDSYKE             |                   | 1        |           |          |          |            |             |             |
|              | 207_AINQTKIGAYTPVSDPLQALKD   |                   | 1        |           |          |          |            |             |             |

**Table S7:** Transcriptome analysis of aggregated *M. mazei* cells past infection with MetSV vs. uninfected cells using microarrays.

| #ORF | Gene product/protein                                  | fold regulation | standard derivation |
|------|-------------------------------------------------------|-----------------|---------------------|
| 1    | Dipeptide ABC transporter. binding protein            | 1.08            | 0.6                 |
| 2    | Dipeptide ABC transporter. binding protein            | 0.13            | 0.08                |
| 3    | Hypothetical protein                                  | 0.35            | 0.17                |
| 4    | Dipeptide ABC transporter. permease protein           | 0.3             | 0.28                |
| 5    | Dipeptide ABC transporter. permease protein           | 0.26            | 0.08                |
| 6    | Metal-dependent hydrolase                             | 0.37            | 0.26                |
| 7    | Dipeptide ABC transporter. ATP-binding protein        | 0.34            | 0.32                |
| 8    | Conserved protein                                     | 1.7             | 0.59                |
| 10   | Hypothetical protein                                  | 0.7             | 0.26                |
| 11   | Conserved protein                                     | 0.96            | 0.65                |
| 17   | Ubiquinone/menaquinone biosynthesis methyltransferase | 1.63            | 0.77                |
| 19   | Conserved protein                                     | 2.36            | 0.2                 |
| 23   | Conserved protein                                     | 1.07            | 0.33                |
| 24   | Hypothetical protein                                  | 2.07            | 0.79                |
| 25   | Hypothetical protein                                  | 1.65            | 0.35                |
| 28   | Superfamily I DNA and RNA helicase                    | 1.57            | 0.35                |
| 31   | Hypothetical protein                                  | 1.27            | 0.17                |
| 32   | Conserved protein                                     | 1.25            | 0.28                |
| 35   | Conserved protein                                     | 0.76            | 0.48                |
| 36   | Hypothetical protein                                  | 1.15            | 0.5                 |
| 37   | Argininosuccinate synthase                            | 0.66            | 0.2                 |
| 38   | Carbamoyl-phosphate synthase large chain              | 0.43            | 0.06                |
| 39   | Carbamoyl-phosphate synthase small chain              | 0.38            | 0.07                |



|    |                                                               |      |      |
|----|---------------------------------------------------------------|------|------|
| 41 | Glycine betaine transporter. permease protein (OtaB)          | 1.54 | 0.42 |
| 42 | Glycine betaine transporter. substrate-binding protein (OtaC) | 2.02 | 0.64 |
| 44 | Hypothetical protein                                          | 2.58 | 0.33 |
| 45 | Hypothetical protein                                          | 2.07 | 0.54 |
| 46 | Hypothetical protein                                          | 1.26 | 0.44 |
| 47 | Acetylornithine aminotransferase                              | 0.82 | 0.54 |
| 48 | Aldehyde dehydrogenase                                        | 0.98 | 0.48 |
| 49 | Conserved protein                                             | 1.72 | 0.11 |
| 50 | Glutamyl-tRNA (Gln) amidotransferase                          | 1.16 | 0.42 |
| 52 | Transposase                                                   | 1.29 | 0.24 |
| 55 | Universal stress protein                                      | 2.02 | 0.45 |
| 56 | Heterodisulfate reductase. subunit HdrA                       | 2.04 | 1.03 |
| 57 | Tungsten formylmethanofuran dehydrogenase. subunit F          | 0.86 | 0.42 |
| 58 | Tungsten formylmethanofuran dehydrogenase. subunit G          | 0.93 | 0.82 |
| 59 | Tungsten formylmethanofuran dehydrogenase subunit B           | 1.2  | 1.05 |
| 60 | Tungsten formylmethanofuran dehydrogenase subunit D           | 1.56 | 0.23 |
| 61 | Conserved protein                                             | 1.49 | 0.37 |
| 62 | Putative methyltransferase                                    | 1.48 | 0.09 |
| 63 | Cell surface glycoprotein (s-layer protein)                   | 0.95 | 0.14 |
| 64 | Cell surface glycoprotein (s-layer protein)                   | 0.96 | 0.82 |
| 66 | Conserved protein                                             | 0.7  | 0.18 |
| 67 | Hypothetical protein                                          | 1.89 | 0.19 |
| 68 | N-methylhydantoinase                                          | 1.6  | 1.2  |
| 69 | Sodium-dependent transporter                                  | 2.35 | 0.18 |
| 70 | Putative ribosomal RNA methyltransferase                      | 0.42 | 0.24 |
| 71 | Conserved protein                                             | 0.51 | 0.06 |

|     |                                            |       |       |
|-----|--------------------------------------------|-------|-------|
| 72  | Thermosome beta-subunit                    | 0.65  | 0.49  |
| 73  | Ribose 5-phosphate isomerase               | 0.43  | 0.04  |
| 74  | Aspartyl-tRNA synthetase                   | 0.31  | 0.12  |
| 77  | Hypothetical protein                       | 0.21  | 0.18  |
| 78  | Xanthine-guanine phosphoribosyltransferase | 1.39  | 0.98  |
| 79  | Conserved protein                          | 1.01  | 0.24  |
| 80  | Hypothetical protein                       | 58.19 | 61.55 |
| 81  | Hypothetical protein                       | 0.5   | 0.03  |
| 82  | Phosphoserine phosphatase                  | 0.44  | 0.03  |
| 86  | Hypothetical protein                       | 0.56  | 0.11  |
| 87  | Pyrimidine-nucleoside phosphorylase        | 0.96  | 0.55  |
| 89  | Hypothetical protein                       | 0.83  | 0.47  |
| 90  | Conserved protein                          | 2.43  | 1.85  |
| 91  | ABC transporter. permease protein          | 2.88  | 1.12  |
| 92  | Conserved protein                          | 3.25  | 0.88  |
| 93  | Cobyric acid synthase CbiP                 | 2.45  | 1.18  |
| 95  | Conserved protein                          | 1.2   | 0.55  |
| 97  | Ornithine cyclodeaminase                   | 1.85  | 0.09  |
| 98  | Conserved protein                          | 1.02  | 0.52  |
| 99  | Tetratrico peptide repeat protein          | 3.34  | 0.83  |
| 100 | Conserved protein                          | 2.79  | 0.86  |
| 102 | Serine/threonine protein phosphatase       | 1.96  | 1.05  |
| 103 | O-linked N-acetylglucosamine transferase   | 1.56  | 0.55  |
| 105 | Hypothetical protein                       | 1.46  | 0.54  |
| 108 | Hypothetical protein                       | 0.44  | 0.2   |
| 109 | Cysteine desulfhydrase                     | 2.12  | 1.03  |
| 110 | NifU protein                               | 2.61  | 2.03  |

|     |                                          |       |      |
|-----|------------------------------------------|-------|------|
| 112 | Hypothetical protein                     | 1.1   | 0.29 |
| 113 | Conserved protein                        | 1.13  | 0.12 |
| 114 | Conserved protein                        | 0.7   | 0    |
| 115 | Putative transmembrane efflux protein    | 1.91  | 0.43 |
| 116 | Transcriptional regulator. MarR family   | 2.92  | 1.48 |
| 117 | Hypothetical protein                     | 0.32  | 0.2  |
| 118 | CTP synthase                             | 0.44  | 0.22 |
| 119 | Hypothetical protein                     | 0.78  | 0.36 |
| 120 | Conserved protein                        | 0.53  | 0.05 |
| 121 | Carbon monoxide dehydrogenase            | 3.47  | 2.08 |
| 122 | Iron-sulfur-binding protein              | 4.08  | 2.27 |
| 123 | Universal stress protein                 | 0.88  | 0.4  |
| 125 | Universal stress protein                 | 0.83  | 0.57 |
| 126 | PmbA protein                             | 0.82  | 0.66 |
| 127 | Zinc metalloprotease                     | 0.82  | 0.39 |
| 128 | ATP-dependent protease La                | 0.65  | 0.51 |
| 129 | Conserved protein                        | 1.26  | 0.27 |
| 131 | Conserved protein                        | 0.99  | 0.24 |
| 133 | Threonine synthase                       | 1.55  | 1.71 |
| 134 | Sulfofpyruvate decarboxylase alpha chain | 1.66  | 0.83 |
| 135 | Ferredoxin oxidoreductase                | 0.93  | 0.09 |
| 137 | Conserved protein                        | 0.93  | 0.35 |
| 138 | Conserved protein                        | 18.24 | 2.1  |
| 139 | Cytochrome c-type biogenesis protein     | 1.89  | 1.01 |
| 141 | Conserved protein                        | 0.45  | 0.17 |
| 142 | Orotate phosphoribosyltransferase        | 0.44  | 0.08 |
| 144 | Phosphoribosylamine--glycine ligase      | 0.47  | 0.36 |

|     |                                                    |       |      |
|-----|----------------------------------------------------|-------|------|
| 145 | Ornithine carbamoyltransferase                     | 1.01  | 0.18 |
| 147 | Iron-sulfur flavoprotein                           | 1.24  | 0.49 |
| 148 | Conserved protein                                  | 1.1   | 0.37 |
| 149 | Hypothetical protein                               | 1.4   | 0.14 |
| 152 | DNA integration/recombination/inversion protein    | 0.86  | 0.63 |
| 153 | Conserved protein                                  | 0.72  | 0.21 |
| 154 | Conserved protein                                  | 1.15  | 0.27 |
| 155 | Conserved protein                                  | 0.35  | 0.16 |
| 156 | Type III restriction enzyme                        | 0.93  | 0.46 |
| 157 | ATP-dependent DNA helicase                         | 1.15  | 0.04 |
| 158 | ATP-dependent DNA helicase                         | 1.09  | 0.11 |
| 159 | Hypothetical protein                               | 2.23  | 0.76 |
| 161 | Hypothetical protein                               | 1.26  | 0.29 |
| 162 | Conserved protein                                  | 1.39  | 0.09 |
| 163 | DNA repair protein                                 | 0.8   | 0.21 |
| 164 | ATP-dependent protease La                          | 1.23  | 0.54 |
| 166 | Homospermidine synthase                            | 1.03  | 0.02 |
| 167 | Cobalt-zinc-cadmium resistance protein             | 0.65  | 0.13 |
| 169 | Hypothetical sensory transduction histidine kinase | 0.36  | 0.19 |
| 171 | Transposase                                        | 0.72  | 0.28 |
| 173 | AdoCbi amidohydrolase CbiZ                         | 0.9   | 0.59 |
| 174 | Methanol corrinoid protein MtaC3                   | 12.09 | 7.76 |
| 175 | Methanol:corrinoid methyltransferase MtaB3         | 5.2   | 3.33 |
| 176 | Methylcobalamin:coenzyme M methyltransferase MtaA2 | 8.12  | 4.93 |
| 178 | Conserved protein                                  | 1.43  | 0.11 |
| 181 | Conserved protein                                  | 1.27  | 0.03 |

|     |                                                   |      |      |
|-----|---------------------------------------------------|------|------|
| 182 | Thiamine biosynthesis protein                     | 0.38 | 0.05 |
| 183 | DNA topoisomerase III                             | 1.28 | 0.19 |
| 184 | SSU ribosomal protein S3AE                        | 0.28 | 0.18 |
| 185 | Short chain dehydrogenase/reductase               | 1.37 | 0.37 |
| 187 | Nucleotidyltransferase                            | 2.41 | 1.05 |
| 188 | Putative nucleotidyltransferase                   | 2.27 | 0.27 |
| 201 | Conserved protein                                 | 1.09 | 0    |
| 204 | Hypothetical protein                              | 1.66 | 0.01 |
| 205 | Conserved protein                                 | 0.82 | 0.05 |
| 208 | Hypothetical protein                              | 1.69 | 0.67 |
| 209 | Hypothetical protein                              | 1.45 | 0.3  |
| 210 | Conserved protein                                 | 0.92 | 0.47 |
| 212 | Conserved protein                                 | 0.45 | 0.2  |
| 213 | Putative single-stranded-DNA-specific exonuclease | 0.84 | 0.32 |
| 216 | Conserved protein                                 | 0.49 | 0.02 |
| 218 | Hypothetical protein                              | 0.96 | 0.24 |
| 219 | Conserved protein                                 | 2.12 | 0.56 |
| 221 | Fe-S oxidoreductase                               | 0.7  | 0.16 |
| 222 | Thiazole biosynthetic enzyme                      | 0.36 | 0.02 |
| 223 | Hypothetical protein                              | 1.18 | 0.1  |
| 225 | Conserved protein                                 | 6.66 | 10   |
| 227 | Conserved protein                                 | 2.29 | 1.89 |
| 230 | Sodium-calcium exchanger                          | 0.37 | 0.14 |
| 233 | Alanyl-tRNA synthetase                            | 0.59 | 0.18 |
| 235 | Conserved protein                                 | 1.15 | 0.12 |
| 236 | Putative mechanosensitive ion channel             | 2.57 | 0.53 |
| 237 | Conserved protein                                 | 1.31 | 0.83 |

|     |                                                                 |      |       |
|-----|-----------------------------------------------------------------|------|-------|
| 239 | Conserved protein                                               | 5.44 | 3.58  |
| 241 | Potential ferredoxin oxidoreductase                             | 0.42 | 0.28  |
| 242 | Glycerol-3-phosphate cytidyltransferase                         | 0.47 | 0.19  |
| 243 | Aspartate aminotransferase                                      | 0.53 | 0.39  |
| 244 | Riboflavin synthase. subunit beta                               | 0.48 | 0.39  |
| 245 | Riboflavin synthase. subunit alpha                              | 0.44 | 0.37  |
| 247 | Putative inosine monophosphate dehydrogenase                    | 0.43 | 0.21  |
| 250 | Transposase                                                     | 0.7  | 0.11  |
| 251 | Transposase                                                     | 0.42 | 0.1   |
| 253 | Replication factor c subunit                                    | 1.03 | 0.28  |
| 254 | N5-METHYL-H4MPT:COENZYME M METHYLTRANSFERASE. SUBUNIT X         | 0.53 | 0.18  |
| 255 | N5-methyl-H4MPT:coenzyme M methyltransferase. subunit A homolog | 0.86 | 0.45  |
| 256 | N5-methyl-H4MPT:coenzyme M methyltransferase. subunit H homolog | 0.73 | 0.09  |
| 257 | Hypothetical protein                                            | 2.04 | 1.42  |
| 259 | Dihydroxy-acid dehydratase                                      | 0.6  | 0.31  |
| 261 | Uncharacterized flavoprotein                                    | 2.73 | 1.03  |
| 262 | Conserved protein                                               | 1.33 | 0.81  |
| 263 | Conserved protein                                               | 1.85 | 1.19  |
| 267 | Conserved protein                                               | 0.67 | 0.07  |
| 268 | Conserved protein                                               | 1.52 | 0.56  |
| 269 | Hypothetical protein                                            | 1.43 | 0.04  |
| 270 | Conserved protein                                               | 1.32 | 0.2   |
| 271 | Conserved protein                                               | 1.26 | 0.47  |
| 272 | Hypothetical protein                                            | 1.04 | 0.05  |
| 276 | Superfamily II DNA and RNA helicase                             | 9.11 | 12.02 |

|     |                                                                    |      |      |
|-----|--------------------------------------------------------------------|------|------|
| 277 | T/G-SPECIFIC DNA GLYCOSYLASE                                       | 0.7  | 0.03 |
| 278 | DNA-cytosine methyltransferase                                     | 0.46 | 0.36 |
| 279 | Membrane alanine aminopeptidase                                    | 1.05 | 0.41 |
| 281 | Hypothetical protein                                               | 1.18 | 0.17 |
| 282 | Threonine synthase                                                 | 0.6  | 0.23 |
| 283 | Leucyl-tRNA synthetase                                             | 0.6  | 0.2  |
| 284 | Amidohydrolase (putative)                                          | 0.6  | 0.41 |
| 285 | Conserved protein                                                  | 0.46 | 0.33 |
| 286 | Hypothetical protein                                               | 0.33 | 0.23 |
| 287 | Deoxyhypusine synthase                                             | 0.45 | 0.38 |
| 288 | Transcriptional regulator. ArsR family                             | 0.67 | 0.48 |
| 289 | Transcriptional regulator                                          | 0.67 | 0.44 |
| 290 | Hypothetical protein                                               | 1.23 | 0.02 |
| 291 | Hypothetical protein                                               | 1.68 | 0.03 |
| 292 | Conserved protein                                                  | 2.49 | 0.47 |
| 293 | Conserved protein                                                  | 3.5  | 1.66 |
| 294 | Na <sup>+</sup> /H <sup>+</sup> antiporter                         | 2.46 | 1.62 |
| 297 | Glycine betaine transporter. ATP-binding protein                   | 0.96 | 0.29 |
| 298 | Glycine betaine-binding protein                                    | 1.11 | 0.54 |
| 299 | Glucose-1-phosphate thymidyltransferase                            | 0.99 | 0.63 |
| 300 | Glucosamine-fructose-6-phosphate aminotransferase<br>[isomerizing] | 0.69 | 0.52 |
| 301 | Phosphoglucomutase/phosphomannomutase                              | 0.96 | 0.68 |
| 302 | Glucose-1-phosphate thymidyltransferase                            | 0.58 | 0.37 |
| 303 | Hypothetical protein                                               | 2.09 | 0.59 |
| 305 | Conserved protein                                                  | 0.71 | 0.35 |
| 306 | Metal-dependent hydrolases                                         | 0.43 | 0.06 |

|     |                                                                 |      |      |
|-----|-----------------------------------------------------------------|------|------|
| 307 | Uroporphyrin-III C-methyltransferase                            | 0.79 | 0.21 |
| 308 | Uroporphyrinogen-III synthase                                   | 1.11 | 0    |
| 309 | Metallo cofactor biosynthesis protein (moaA/ nifB /pqqE family) | 0.75 | 0.18 |
| 312 | Hypothetical protein                                            | 0.88 | 0    |
| 314 | Valyl-tRNA synthetase                                           | 0.39 | 0.2  |
| 316 | Flagella related protein FlaJ                                   | 0.94 | 0.23 |
| 323 | Flagellin B1 precursor                                          | 0.94 | 0.18 |
| 325 | Chemotaxis protein methyltransferase CheR                       | 0.95 | 0.22 |
| 326 | Chemotaxis protein CheD                                         | 0.97 | 0.19 |
| 327 | Chemotaxis protein CheC                                         | 1.11 | 0.07 |
| 329 | Protein-glutamate methyltransferase CheB                        | 2.71 | 2.82 |
| 330 | Chemotaxis protein CheY                                         | 1.4  | 0.5  |
| 333 | Methyl-accepting chemotaxis protein                             | 1    | 0.26 |
| 334 | Hypothetical protein                                            | 0.71 | 0.54 |
| 335 | 3-Hydroxy-3-methylglutaryl-coenzyme A reductase                 | 0.98 | 0.12 |
| 337 | Tryptophan synthase. beta chain                                 | 0.49 | 0.04 |
| 338 | hydroxymethylpyrimidine kinase                                  | 1.25 | 0.29 |
| 339 | small nuclear ribonucleoprotein                                 | 0.31 | 0.28 |
| 340 | LSU ribosomal protein L37E                                      | 0.33 | 0.31 |
| 341 | Amidophosphoribosyltransferase                                  | 0.35 | 0.32 |
| 342 | Hypothetical protein                                            | 1.04 | 0    |
| 344 | Probable cation efflux pump                                     | 0.77 | 0.03 |
| 345 | Transcriptional regulator                                       | 0.73 | 0.15 |
| 346 | Transcriptional regulator. MarR family                          | 0.77 | 0    |
| 347 | Hypothetical protein                                            | 1.88 | 1.92 |
| 348 | Putative cation efflux pump                                     | 1.34 | 0.09 |



|     |                                             |       |       |
|-----|---------------------------------------------|-------|-------|
| 350 | Putative molybdopterin biosynthesis protein | 1.51  | 0.02  |
| 351 | Conserved protein                           | 28.65 | 44.48 |
| 352 | Hypothetical protein                        | 72.67 | 96.7  |
| 356 | Conserved protein                           | 0.93  | 0.17  |
| 357 | Glutamate dehydrogenase                     | 1.19  | 0.27  |
| 358 | Acetyl-CoA synthetase. alpha subunit        | 2.55  | 1.31  |
| 359 | Hypothetical protein                        | 2.12  | 1.08  |
| 360 | Sulfite reductase. assimilatory-type        | 1.27  | 0.67  |
| 362 | Sulfite reductase. assimilatory-type        | 2.13  | 2.68  |
| 363 | Hypothetical protein                        | 2.56  | 2.58  |
| 364 | Hypothetical protein                        | 3.37  | 1.74  |
| 365 | Hypothetical protein                        | 2.43  | 0.61  |
| 366 | Ferredoxin                                  | 2.68  | 0.98  |
| 368 | Hypothetical protein                        | 1.72  | 1.35  |
| 369 | Hypothetical protein                        | 2.63  | 0.02  |
| 370 | Chorismate mutase / prephenate dehydratase  | 0.49  | 0.02  |
| 371 | Conserved protein                           | 0.91  | 0.29  |
| 372 | MoxR-like ATPase                            | 0.77  | 0.24  |
| 373 | Hypothetical protein                        | 0.87  | 0.13  |
| 374 | Conserved protein                           | 0.77  | 0.09  |
| 375 | Conserved protein                           | 1.15  | 0.1   |
| 376 | Conserved protein                           | 3.4   | 1.79  |
| 377 | Integral membrane protein                   | 1.2   | 0.42  |
| 378 | Sugar-phosphate nucleotidyltransferase      | 1.06  | 0.14  |
| 379 | Conserved protein                           | 1.26  | 0.21  |
| 380 | Peptidyl-prolyl cis-trans isomerase         | 0.49  | 0.02  |
| 381 | Peptidyl-prolyl cis-trans isomerase         | 0.72  | 0.16  |

|     |                                                           |      |      |
|-----|-----------------------------------------------------------|------|------|
| 382 | Peptidyl-prolyl cis-trans isomerase                       | 0.46 | 0.26 |
| 383 | Hypothetical protein                                      | 0.9  | 0.43 |
| 384 | Conserved protein                                         | 1.56 | 0.22 |
| 385 | Hypothetical protein                                      | 0.21 | 0.07 |
| 386 | Hypothetical protein                                      | 1.29 | 0.23 |
| 387 | Heterodisulfate reductase. subunit HdrA                   | 0.67 | 0.38 |
| 388 | Heterodisulfate reductase. subunit HdrC                   | 0.79 | 0.51 |
| 389 | Heterodisulfate reductase. subunit HdrB                   | 0.76 | 0.57 |
| 390 | Surface layer protein (putative)                          | 1.44 | 0.2  |
| 391 | Hypothetical protein                                      | 1.37 | 0.84 |
| 395 | Surface layer protein (putative)                          | 0.98 | 0.25 |
| 401 | Conserved protein                                         | 1.24 | 0.19 |
| 403 | Hypothetical protein similar to C-terminal domain of HdrB | 1.1  | 0.48 |
| 404 | Hypothetical protein                                      | 0.92 | 0.37 |
| 405 | Surface layer protein (putative)                          | 2.28 | 2.4  |
| 407 | Hypothetical protein similar to C-terminal domain of HdrB | 1.8  | 0.79 |
| 408 | Hypothetical protein                                      | 2.48 | 0.96 |
| 409 | 3-Isopropylmalate dehydratase                             | 0.35 | 0.18 |
| 410 | Hypothetical protein                                      | 1.52 | 1.11 |
| 419 | Pyruvate synthase. subunit beta                           | 2.53 | 0.78 |
| 420 | Pyruvate synthase. subunit alpha                          | 3.54 | 3.23 |
| 423 | Conserved protein                                         | 0.55 | 0.25 |
| 424 | Histidinol dehydrogenase                                  | 0.5  | 0.14 |
| 426 | RNase L inhibitor                                         | 0.68 | 0.32 |
| 427 | Hypothetical protein                                      | 0.43 | 0.18 |

|     |                                                                                              |       |       |
|-----|----------------------------------------------------------------------------------------------|-------|-------|
| 428 | Conserved protein                                                                            | 0.64  | 0.27  |
| 429 | Type I restriction-modification system methylation subunit                                   | 1.11  | 0.14  |
| 431 | Type I restriction-modification system restriction subunit                                   | 1.96  | 0.8   |
| 435 | Conserved protein                                                                            | 1.15  | 0.11  |
| 436 | Thioredoxin                                                                                  | 0.78  | 0.4   |
| 437 | Hypothetical protein                                                                         | 0.62  | 0.02  |
| 438 | Methylenetetrahydrofolate reductase                                                          | 1.55  | 1.42  |
| 439 | Zinc finger protein                                                                          | 1.9   | 0.93  |
| 440 | Dihydropteroate synthase                                                                     | 2.53  | 0.75  |
| 441 | Methylenetetrahydrofolate dehydrogenase (NADP+)/<br>methylenetetrahydrofolate cyclohydrolase | 0.33  | 0.1   |
| 442 | Serine hydroxymethyltransferase                                                              | 0.31  | 0.11  |
| 443 | Phosphoribosylglycinamide formyltransferase                                                  | 0.31  | 0.24  |
| 444 | HTH DNA-binding protein                                                                      | 1.21  | 0.7   |
| 445 | Hypothetical protein                                                                         | 0.54  | 0.06  |
| 446 | NAD <sup>+</sup> synthetase                                                                  | 0.49  | 0.1   |
| 447 | Cell division control protein (AAA family ATPase)                                            | 2.19  | 1.77  |
| 448 | Hypothetical protein                                                                         | 2.2   | 0.58  |
| 449 | SAM-dependent methyltransferases                                                             | 1.31  | 0.21  |
| 451 | Hypothetical protein                                                                         | 5.4   | 6.45  |
| 453 | Conserved protein                                                                            | 29.38 | 51.32 |
| 455 | Hypothetical protein                                                                         | 1.18  | 0.06  |
| 456 | Hydrolase (HAD superfamily)                                                                  | 1.76  | 0.49  |
| 457 | Recombination/repair protein RadA                                                            | 0.67  | 0.5   |
| 458 | Cytidyltransferase                                                                           | 0.55  | 0.05  |
| 459 | Conserved protein                                                                            | 0.62  | 0.15  |

|     |                                                                       |       |       |
|-----|-----------------------------------------------------------------------|-------|-------|
| 460 | Probable endonuclease IV                                              | 0.86  | 0     |
| 461 | 5-Methyltetrahydropteroyltriglutamate--homocysteine methyltransferase | 3.82  | 3.98  |
| 462 | Cobalt transport ATP-binding protein CbiO                             | 1.49  | 0.46  |
| 463 | Cobalt ABC transporter, permease protein CbiQ                         | 1.67  | 0.29  |
| 464 | Cobalt transport protein CbiN                                         | 20.76 | 21.85 |
| 465 | Cobalamin biosynthesis protein CbiM                                   | 22.62 | 25.25 |
| 466 | CbiM protein                                                          | 0.41  | 0.22  |
| 467 | Conserved protein                                                     | 8.14  | 7.11  |
| 468 | Conserved protein                                                     | 0.38  | 0.33  |
| 469 | Hypothetical protein                                                  | 0.77  | 0.42  |
| 471 | tRNA nucleotidyltransferase                                           | 1.67  | 0.17  |
| 472 | ADP-specific phosphofructokinase                                      | 2.28  | 0.03  |
| 473 | ADP-specific phosphofructokinase                                      | 2.48  | 0.25  |
| 474 | Glutamate N-acetyltransferase /amino-acid acetyltransferase           | 0.99  | 0.85  |
| 475 | Putative inosine-5'-monophosphate dehydrogenase                       | 1.22  | 0.62  |
| 476 | N-acetyl-gamma-glutamyl-phosphate reductase                           | 0.63  | 0.49  |
| 477 | Hypothetical protein                                                  | 2.97  | 0.51  |
| 478 | Hypothetical protein                                                  | 1.91  | 0.4   |
| 479 | Conserved protein                                                     | 0.32  | 0.17  |
| 481 | Acetyltransferase                                                     | 0.7   | 0.31  |
| 483 | Small heat shock protein                                              | 3.11  | 2.71  |
| 484 | Hypothetical protein                                                  | 0.66  | 0.11  |
| 485 | Phosphoglycerate kinase                                               | 0.48  | 0.25  |
| 488 | Ferredoxin                                                            | 0.86  | 0.31  |
| 489 | Ferredoxin                                                            | 0.8   | 0.28  |

|     |                                                    |        |        |
|-----|----------------------------------------------------|--------|--------|
| 490 | Phycocyanin alpha-subunit phycocyanobilin lyase    | 113.01 | 96.7   |
| 491 | Conserved protein                                  | 169.9  | 124.24 |
| 492 | Hypothetical protein                               | 119.32 | 150.9  |
| 495 | Acetate kinase                                     | 5.14   | 2.99   |
| 496 | Phosphate acetyltransferase                        | 6.38   | 2.6    |
| 497 | Iron-sulfur flavoprotein (Isf)                     | 0.74   | 0.46   |
| 498 | Putative chloride channel protein                  | 0.7    | 0.04   |
| 500 | Hypothetical protein                               | 1.4    | 0.04   |
| 501 | 3-Demethylubiquinone-9 3-methyltransferase         | 1.85   | 0.76   |
| 502 | Translation initiation inhibitor                   | 1.54   | 0.91   |
| 505 | Methylcobalamin:coenzyme M methyltransferase MtbA  | 1.16   | 0.19   |
| 506 | Conserved protein                                  | 0.86   | 0.02   |
| 510 | GTP-binding protein                                | 1.1    | 0.31   |
| 511 | Conserved protein                                  | 0.83   | 0.21   |
| 512 | tRNA-intron endonuclease                           | 1.07   | 0.77   |
| 513 | Cobyrinic acid a.c-diamide synthase                | 1.81   | 0.91   |
| 514 | Nitrogenase iron protein                           | 0.8    | 0.48   |
| 515 | Conserved protein                                  | 1.13   | 1.04   |
| 516 | Hypothetical protein                               | 1.18   | 1.23   |
| 517 | Conserved protein                                  | 1.21   | 1.35   |
| 518 | Hypothetical sensory transduction histidine kinase | 1.17   | 0.54   |
| 519 | Hypothetical protein                               | 0.62   | 0.02   |
| 520 | Hypothetical protein                               | 0.66   | 0.03   |
| 523 | Hypothetical protein                               | 2.44   | 0.54   |
| 524 | Hypothetical protein                               | 2.27   | 0.61   |
| 526 | Hypothetical protein                               | 1.78   | 0.25   |
| 529 | Hydrolase                                          | 0.43   | 0.08   |

|     |                                               |      |      |
|-----|-----------------------------------------------|------|------|
| 530 | Amino acid permease                           | 0.74 | 0.02 |
| 533 | Conserved protein                             | 1.51 | 0.11 |
| 537 | Hypothetical protein                          | 1.34 | 0.79 |
| 541 | Conserved protein                             | 0.87 | 0.32 |
| 542 | Hypothetical protein                          | 0.69 | 0.24 |
| 544 | Exoribonuclease II                            | 1.13 | 0.5  |
| 550 | Hypothetical protein                          | 1    | 0.32 |
| 552 | Hypothetical protein                          | 0.5  | 0.05 |
| 559 | Hypothetical protein                          | 1.27 | 0.06 |
| 562 | Hypothetical protein                          | 2.37 | 1.01 |
| 566 | Hypothetical protein                          | 1.55 | 0.73 |
| 567 | Acetyltransferase                             | 1.26 | 0.58 |
| 570 | ABC transporter. ATP-binding protein          | 0.53 | 0.16 |
| 572 | Alkaline phosphatase                          | 0.67 | 0.02 |
| 577 | Phosphate transport ATP-binding protein       | 0.75 | 0.06 |
| 578 | Phosphate-binding protein                     | 0.27 | 0.03 |
| 582 | Glycosyltransferase                           | 1.27 | 0.18 |
| 583 | Conserved protein                             | 3.98 | 2.26 |
| 584 | Conserved protein                             | 0.85 | 0.45 |
| 586 | Sulfate adenyltransferase                     | 2.73 | 1.14 |
| 587 | Conserved protein                             | 0.7  | 0.32 |
| 588 | Conserved protein                             | 0.65 | 0.37 |
| 589 | Conserved protein                             | 0.48 | 0.36 |
| 590 | Glycerol-1-phosphate dehydrogenase (putative) | 0.88 | 0.5  |
| 591 | Conserved membrane protein                    | 0.8  | 0.33 |
| 592 | Integral membrane protein                     | 0.77 | 0.35 |
| 593 | Conserved protein                             | 0.47 | 0.21 |

|     |                                                               |      |      |
|-----|---------------------------------------------------------------|------|------|
| 594 | Protein translation initiation factor 2 subunit gamma (IF-2g) | 0.46 | 0.22 |
| 595 | Conserved protein                                             | 0.31 | 0.24 |
| 596 | DNA-directed RNA polymerase subunit E'                        | 0.39 | 0.26 |
| 597 | DNA-directed RNA polymerase subunit E''                       | 0.57 | 0.23 |
| 598 | Hypothetical protein                                          | 0.36 | 0.1  |
| 599 | SSU ribosomal protein S24E                                    | 0.47 | 0.05 |
| 600 | 30S ribosomal protein S27ae                                   | 0.41 | 0.14 |
| 602 | O-sialoglycoprotein endopeptidase                             | 0.36 | 0.08 |
| 603 | Nucleoside-triphosphatase                                     | 0.26 | 0.14 |
| 604 | Conserved protein                                             | 1.38 | 0.58 |
| 607 | Ferredoxin                                                    | 1.28 | 0.75 |
| 608 | Probable radical-forming protein                              | 0.55 | 0.3  |
| 609 | Conserved protein                                             | 0.6  | 0.08 |
| 610 | Acetyltransferases                                            | 4.33 | 4.27 |
| 612 | NH <sub>3</sub> -dependent NAD(+) synthetase                  | 2.23 | 1.39 |
| 613 | Conserved protein                                             | 3.11 | 1.42 |
| 614 | Long-chain-fatty-acid--CoA ligase                             | 2.29 | 1.22 |
| 615 | Conserved protein                                             | 2.16 | 1.44 |
| 616 | Conserved protein                                             | 1.74 | 0.04 |
| 617 | Conserved protein                                             | 0.21 | 0.08 |
| 618 | Undecaprenyl pyrophosphate synthetase                         | 1.26 | 0.11 |
| 620 | Conserved protein                                             | 1.81 | 0.8  |
| 621 | Hypothetical protein                                          | 1.03 | 0.36 |
| 626 | Nicotinamide-nucleotide adenylyltransferase                   | 0.3  | 0.13 |
| 627 | F420H2 dehydrogenase. subunit FpoF                            | 0.21 | 0.18 |
| 628 | Coenzyme F420-dependent N5.N10-methylene                      | 0.25 | 0.29 |

|     |                                                                        |      |      |
|-----|------------------------------------------------------------------------|------|------|
|     | tetrahydromethanopterin reductase                                      |      |      |
| 629 | Zinc finger protein                                                    | 1.29 | 0.78 |
| 630 | Zinc finger protein                                                    | 1.04 | 0.68 |
| 631 | Hypothetical protein similar to COX locus protein                      | 1.45 | 1.25 |
| 632 | Desulfoferrodoxin                                                      | 1.37 | 1.11 |
| 633 | Cytochrome c                                                           | 1.73 | 1.09 |
| 634 | Iron-sulfur flavoprotein                                               | 3.78 | 1.84 |
| 635 | Flavoprotein                                                           | 1.66 | 1.4  |
| 636 | Conserved protein                                                      | 2.37 | 1.29 |
| 637 | Putative flavodoxin                                                    | 3.97 | 1.34 |
| 638 | Putative flavodoxin                                                    | 3.41 | 1.16 |
| 642 | Isocitrate dehydrogenase [NADP]                                        | 0.6  | 0.21 |
| 643 | Conserved protein                                                      | 0.72 | 0.05 |
| 644 | Conserved protein                                                      | 1.03 | 0.26 |
| 645 | 3-Isopropylmalate dehydratase                                          | 0.65 | 0.02 |
| 647 | Oligosaccharyl transferase                                             | 1.58 | 0.66 |
| 648 | Glycosyl transferase                                                   | 1.01 | 0.23 |
| 649 | Glycosyl transferase                                                   | 1.2  | 0.01 |
| 651 | Glycosyltransferase involved in cell wall biogenesis                   | 1.11 | 0.09 |
| 652 | Glycosyltransferase involved in cell wall biogenesis                   | 0.94 | 0.55 |
| 654 | Mannosyltransferase                                                    | 0.86 | 0.5  |
| 656 | Polysaccharide ABC transporter. ATP-binding protein                    | 0.91 | 0.29 |
| 657 | Polysaccharide ABC transporter. permease protein                       | 0.96 | 0.19 |
| 658 | GDP-fucose synthetase                                                  | 1.36 | 0.2  |
| 660 | Mannose-6-phosphate isomerase/mannose-1-phosphate guanylyl transferase | 1.33 | 0.2  |
| 663 | Probable dihydroorotate dehydrogenase electron transfer                | 0.46 | 0.15 |



|     |                                                       |       |      |
|-----|-------------------------------------------------------|-------|------|
|     | subunit                                               |       |      |
| 666 | Putative nickel-responsive regulator NikR             | 3.91  | 2.45 |
| 667 | Nitroreductase family protein                         | 2.07  | 1.34 |
| 668 | Ketol-acid reductoisomerase                           | 0.83  | 0.36 |
| 669 | Acetolactate synthase small subunit                   | 0.44  | 0.36 |
| 670 | Acetolactate synthase large subunit                   | 0.46  | 0.36 |
| 671 | 2-Isopropylmalate synthase                            | 0.52  | 0.51 |
| 673 | Conserved protein                                     | 1.35  | 0.2  |
| 674 | Prefoldin beta subunit                                | 0.43  | 0.25 |
| 675 | Conserved protein                                     | 0.59  | 0.37 |
| 676 | Coenzyme F390 synthetase/phenylacetyl-CoA ligase      | 0.34  | 0.14 |
| 677 | Acetolactate synthase small subunit                   | 0.57  | 0.44 |
| 678 | Conserved protein                                     | 0.53  | 0.16 |
| 679 | Conserved protein                                     | 0.67  | 0.04 |
| 680 | Conserved protein                                     | 1.85  | 0.72 |
| 681 | Conserved protein                                     | 1.66  | 0.51 |
| 682 | Integral membrane protein                             | 1.56  | 0.39 |
| 684 | CO dehydrogenase/acetyl-CoA synthase. alpha subunit   | 16.85 | 0.69 |
| 685 | CO dehydrogenase/acetyl-CoA synthase. epsilon subunit | 12.59 | 0.43 |
| 686 | CO dehydrogenase/acetyl-CoA synthase. beta subunit    | 5.65  | 1.33 |
| 687 | Nickel-insertion protein CooH                         | 4.78  | 0.58 |
| 688 | CO dehydrogenase/acetyl-CoA synthase. delta subunit   | 4.28  | 2.66 |
| 689 | CO dehydrogenase/acetyl-CoA synthase. gamma subunit   | 3.09  | 2.63 |
| 690 | Conserved protein                                     | 0.49  | 0.43 |
| 691 | Hypothetical protein                                  | 0.53  | 0.21 |
| 692 | Transcription initiation factor IIE. alpha subunit    | 0.42  | 0.29 |
| 693 | Conserved protein                                     | 0.38  | 0.19 |

|     |                                                                 |      |      |
|-----|-----------------------------------------------------------------|------|------|
| 694 | Proteasome. beta subunit                                        | 0.83 | 0.66 |
| 695 | Cleavage and polyadenylation specificity factor. 100 kD subunit | 1.06 | 0.67 |
| 696 | Beta-phosphoglucomutase                                         | 0.45 | 0.36 |
| 697 | Cell division protein                                           | 1.09 | 0.75 |
| 698 | Dihydropteroate synthase                                        | 1.35 | 0.15 |
| 699 | Conserved protein                                               | 1.48 | 0.58 |
| 700 | Vacuolar-type H <sup>+</sup> -pyrophosphatase                   | 0.47 | 0.1  |
| 702 | Hypothetical permease                                           | 0.9  | 0.17 |
| 703 | Hypothetical permease                                           | 0.9  | 0.04 |
| 704 | Conserved protein                                               | 0.44 | 0.27 |
| 705 | Conserved protein                                               | 0.85 | 0.6  |
| 706 | ZPR1-related zinc finger protein                                | 0.85 | 0.68 |
| 707 | Prolyl-tRNA synthetase                                          | 0.54 | 0.26 |
| 708 | Conserved protein                                               | 0.65 | 0.57 |
| 709 | Conserved protein                                               | 1.56 | 0.47 |
| 710 | Hypothetical protein                                            | 2.07 | 0.91 |
| 713 | Conserved protein                                               | 0.92 | 0.21 |
| 714 | Fructose-bisphosphate aldolase                                  | 0.97 | 0.47 |
| 715 | Pyruvate kinase                                                 | 0.78 | 0.31 |
| 716 | Hypothetical protein                                            | 0.81 | 0.55 |
| 717 | Hypothetical protein                                            | 1.32 | 0.4  |
| 722 | Nitrogenase molybdenum-iron protein alpha chain                 | 0.49 | 0.05 |
| 725 | Nitrogenase iron-molybdenum cofactor biosynthesis protein NifN  | 0.76 | 0.23 |
| 727 | Molybdenum transporter. permease protein                        | 1.09 | 0.57 |
| 730 | SAM-dependent methyltransferases                                | 1.84 | 0.85 |

|     |                                               |      |      |
|-----|-----------------------------------------------|------|------|
| 737 | Conserved protein                             | 0.96 | 0.18 |
| 738 | Conserved protein                             | 0.77 | 0.05 |
| 741 | Universal stress protein                      | 1.34 | 0.36 |
| 742 | Arsenical-resistance protein                  | 2.29 | 0.92 |
| 743 | Conserved protein                             | 0.71 | 0.16 |
| 744 | Conserved protein                             | 0.52 | 0.27 |
| 745 | Conserved protein                             | 5.34 | 8.62 |
| 747 | ATP-dependent RNA helicase                    | 0.36 | 0.2  |
| 748 | Conserved protein                             | 0.9  | 0.09 |
| 750 | Dihydropyrimidinase                           | 2.26 | 0.74 |
| 751 | Putative serine/threonine protein phosphatase | 0.92 | 0.06 |
| 752 | Conserved protein                             | 2.01 | 1.29 |
| 753 | Conserved protein                             | 0.53 | 0.29 |
| 754 | Conserved protein                             | 0.55 | 0.01 |
| 755 | Conserved protein                             | 0.37 | 0.02 |
| 757 | NifB protein                                  | 0.74 | 0.49 |
| 758 | Conserved protein                             | 1.37 | 0.13 |
| 759 | NifB protein                                  | 5.92 | 8.44 |
| 760 | Ferredoxin                                    | 0.24 | 0.13 |
| 761 | Thiamin-monophosphate kinase                  | 0.51 | 0.23 |
| 762 | Conserved protein                             | 0.79 | 0.54 |
| 763 | Conserved protein                             | 0.55 | 0.33 |
| 764 | Conserved protein                             | 0.54 | 0.36 |
| 765 | Conserved protein                             | 1.1  | 0.39 |
| 767 | Conserved protein                             | 0.55 | 0.24 |
| 768 | Glycosyl transferase                          | 0.52 | 0.37 |
| 769 | Phosphohydrolase                              | 0.37 | 0.1  |

|     |                                                                                      |      |      |
|-----|--------------------------------------------------------------------------------------|------|------|
| 770 | Conserved protein                                                                    | 0.27 | 0.19 |
| 772 | Conserved protein                                                                    | 0.64 | 0.11 |
| 774 | Conserved protein                                                                    | 0.66 | 0.69 |
| 775 | Conserved protein                                                                    | 0.93 | 0.47 |
| 776 | Conserved protein                                                                    | 0.87 | 0.4  |
| 777 | Hydrogenase maturation protein                                                       | 1.23 | 0.73 |
| 778 | A1AO H <sup>+</sup> ATPASE. SUBUNIT D                                                | 0.88 | 0.91 |
| 779 | A1AO H <sup>+</sup> ATPASE. SUBUNIT B                                                | 0.85 | 0.71 |
| 780 | A1AO H <sup>+</sup> ATPASE. SUBUNIT A                                                | 0.66 | 0.6  |
| 781 | A1AO H <sup>+</sup> ATPASE. SUBUNIT F                                                | 0.66 | 0.52 |
| 782 | A1AO H <sup>+</sup> ATPASE. SUBUNIT C                                                | 0.6  | 0.61 |
| 783 | A1AO H <sup>+</sup> ATPASE. SUBUNIT E                                                | 0.5  | 0.38 |
| 784 | A1AO H <sup>+</sup> ATPASE. SUBUNIT K                                                | 0.55 | 0.46 |
| 785 | A1AO H <sup>+</sup> ATPASE. SUBUNIT I                                                | 0.71 | 0.75 |
| 786 | A1AO H <sup>+</sup> ATPASE. SUBUNIT H                                                | 0.77 | 0.7  |
| 788 | Metallo cofactor biosynthesis protein (moaA/ nifB /pqqE family)                      | 0.53 | 0.21 |
| 789 | Geranyltranstransferase/Farnesyltranstransferase/<br>Hexaprenyl diphosphate synthase | 0.74 | 0.26 |
| 790 | Hypothetical protein                                                                 | 0.97 | 0.22 |
| 792 | Hypothetical protein                                                                 | 3.78 | 2.03 |
| 794 | ADP-ribosylglycohydrolase                                                            | 1.12 | 0.64 |
| 796 | Hypothetical protein                                                                 | 0.73 | 0.4  |
| 797 | Hypothetical protein                                                                 | 3.53 | 1.01 |
| 798 | 26S Proteasome regulatory subunit RPT2/S4                                            | 1.06 | 0.29 |
| 799 | Hypothetical protein                                                                 | 0.62 | 0.1  |
| 800 | Hypothetical protein                                                                 | 0.69 | 0.61 |

|     |                                                |      |      |
|-----|------------------------------------------------|------|------|
| 801 | Adenylosuccinate synthetase                    | 0.29 | 0.08 |
| 802 | SSU ribosomal protein S19E                     | 0.24 | 0.21 |
| 803 | Double-stranded DNA-binding protein            | 0.24 | 0.18 |
| 804 | Conserved hypothetical protein                 | 0.23 | 0.23 |
| 805 | LSU ribosomal protein L39E                     | 0.22 | 0.16 |
| 806 | LSU ribosomal protein L31E                     | 0.27 | 0.23 |
| 807 | Protein translation initiation factor 6 (IF-6) | 0.24 | 0.25 |
| 808 | 50S ribosomal protein LX                       | 0.29 | 0.25 |
| 809 | Prefoldin. alpha subunit                       | 0.4  | 0.21 |
| 810 | Signal recognition particle. subunit Ffh/SRP54 | 0.52 | 0.46 |
| 811 | Stress-responsive transcriptional regulator    | 0.81 | 0.47 |
| 813 | Conserved protein                              | 2.79 | 1.06 |
| 814 | Probable peroxiredoxin                         | 2.07 | 0.01 |
| 817 | Pyrroline-5-carboxylate reductase              | 0.63 | 0.19 |
| 818 | Glutamate 5-kinase                             | 0.44 | 0.05 |
| 819 | Gamma-glutamyl phosphate reductase             | 0.78 | 0.19 |
| 820 | Conserved protein                              | 0.61 | 0.27 |
| 821 | Conserved protein                              | 0.7  | 0.26 |
| 823 | Conserved protein                              | 0.38 | 0.21 |
| 824 | Universal stress protein                       | 0.57 | 0.41 |
| 825 | Conserved protein                              | 0.67 | 0.48 |
| 826 | Conserved protein                              | 0.78 | 0.19 |
| 827 | Conserved protein                              | 0.38 | 0.22 |
| 828 | Conserved protein                              | 0.59 | 0.41 |
| 829 | Conserved protein                              | 0.47 | 0.19 |
| 830 | Molybdopterin biosynthesis MoeA protein        | 1.3  | 0.18 |
| 831 | Molybdopterin converting factor. small subunit | 0.79 | 0.42 |

|     |                                                                  |      |      |
|-----|------------------------------------------------------------------|------|------|
| 833 | Conserved protein                                                | 0.83 | 0.61 |
| 835 | Cation-transporting ATPase                                       | 3.45 | 1.06 |
| 836 | Conserved protein                                                | 1.2  | 0.2  |
| 837 | Conserved protein                                                | 1.84 | 0.6  |
| 838 | Succinate-semialdehyde dehydrogenase [NADP+]                     | 0.93 | 0.16 |
| 840 | Glycosyltransferases involved in cell wall biogenesis (putative) | 0.79 | 0.13 |
| 841 | Transcriptional regulator. ArsR family                           | 0.99 | 0.29 |
| 842 | Conserved protein                                                | 0.57 | 0.33 |
| 843 | Coenzyme F390 synthetase/phenylacetyl-CoA ligase                 | 0.92 | 0.27 |
| 844 | Hypothetical protein                                             | 2.28 | 0.15 |
| 845 | Conserved protein                                                | 1.77 | 0.09 |
| 846 | Conserved protein                                                | 7.97 | 9.62 |
| 849 | Bacterioferritin comigratory protein                             | 1.33 | 0.08 |
| 850 | Conserved protein                                                | 1.51 | 0.19 |
| 853 | Conserved protein                                                | 0.93 | 0.05 |
| 854 | Cell division cycle protein 48 homolog                           | 0.54 | 0.21 |
| 855 | Phosphoribosylamidoimidazole-succinocarboxamide synthase         | 0.32 | 0.12 |
| 856 | Conserved protein                                                | 1.14 | 0.13 |
| 857 | Conserved protein                                                | 0.8  | 0.51 |
| 858 | Protein translation initiation factor 1 (IF-1)                   | 0.79 | 0.49 |
| 859 | Conserved protein                                                | 3.37 | 3.08 |
| 860 | Phosphoribosylformylglycinamide synthase                         | 0.37 | 0.14 |
| 861 | Alpha-amylase                                                    | 2.76 | 2.18 |
| 862 | Alpha-amylase                                                    | 1.15 | 0.42 |
| 863 | Conserved protein                                                | 1.46 | 0.53 |

|     |                                               |      |      |
|-----|-----------------------------------------------|------|------|
| 864 | Glucoamylase                                  | 2.79 | 1.93 |
| 865 | Seryl-tRNA synthetase                         | 0.87 | 0.54 |
| 866 | Periplasmic serine protease                   | 1.63 | 0.53 |
| 867 | Methionyl-tRNA synthetase                     | 0.57 | 0.3  |
| 868 | Adenylate cyclase                             | 0.93 | 0.54 |
| 869 | Conserved protein                             | 0.63 | 0.62 |
| 870 | Beta-ketoacyl synthase/ thiolase              | 0.52 | 0.18 |
| 871 | Hydroxymethylglutaryl-CoA synthase            | 0.95 | 0.5  |
| 872 | Putative transcriptional regulator            | 1.25 | 0.88 |
| 873 | Conserved protein                             | 1.56 | 0.71 |
| 876 | Hypothetical protein                          | 1.2  | 0.06 |
| 882 | Conserved protein                             | 0.69 | 0.18 |
| 883 | Conserved protein                             | 0.28 | 0.09 |
| 884 | Conserved protein                             | 7.62 | 8.07 |
| 886 | DNA polymerase IV                             | 1.41 | 0.34 |
| 887 | Cobalt transport ATP-binding protein CbiO     | 0.66 | 0.13 |
| 888 | Cobalt ABC transporter. permease protein CbiQ | 0.82 | 0.41 |
| 889 | Hypothetical protein                          | 5.89 | 6.09 |
| 892 | Hypothetical protein                          | 2.78 | 2.54 |
| 893 | Cobalamin biosynthesis protein CbiM           | 1.72 | 2.19 |
| 894 | Hypothetical protein                          | 1.68 | 1.75 |
| 895 | Endonuclease III                              | 1.65 | 0.6  |
| 898 | Bifunctional purine biosynthesis protein PurH | 0.49 | 0.33 |
| 899 | Conserved protein                             | 0.89 | 0.71 |
| 901 | Cation-transporting ATPase                    | 3    | 1.16 |
| 902 | Putative methyltransferase                    | 1.89 | 0.66 |
| 903 | Transcriptional regulator                     | 5.12 | 1.68 |

|     |                                                       |      |      |
|-----|-------------------------------------------------------|------|------|
| 904 | Phosphoglycerate mutase                               | 0.4  | 0.19 |
| 905 | Conserved protein                                     | 0.89 | 0.16 |
| 906 | Flap endonuclease-1 (RAD27/FEN1 family)               | 1.61 | 0.22 |
| 907 | Hypothetical protein                                  | 0.94 | 0.24 |
| 908 | Conserved protein                                     | 1.17 | 0.04 |
| 909 | Conserved protein                                     | 1.14 | 0.62 |
| 910 | Potassium/copper-transporting ATPase                  | 1.19 | 0.06 |
| 912 | Conserved protein                                     | 0.77 | 0.65 |
| 913 | Conserved protein                                     | 1.69 | 0.05 |
| 914 | Conserved protein                                     | 1.39 | 0.82 |
| 915 | Conserved protein                                     | 1.4  | 0.87 |
| 916 | Conserved protein                                     | 0.96 | 0.74 |
| 917 | Conserved protein                                     | 1.37 | 0.24 |
| 918 | 4-Carboxymuconolactone decarboxylase                  | 0.71 | 0.48 |
| 919 | Conserved protein                                     | 0.93 | 0.43 |
| 920 | MutT related protein                                  | 1.39 | 1.22 |
| 921 | Aldehyde ferredoxin oxidoreductase                    | 0.95 | 0.19 |
| 922 | Protein translation initiation factor 5A (IF-5A)      | 0.28 | 0.17 |
| 923 | Agmatinase                                            | 0.48 | 0.24 |
| 924 | Conserved protein                                     | 0.31 | 0.24 |
| 925 | Conserved protein                                     | 0.23 | 0.16 |
| 928 | Conserved protein                                     | 1.11 | 0.67 |
| 931 | Hypothetical protein                                  | 1.67 | 0.29 |
| 933 | Glutathione-regulated potassium-efflux system protein | 2.15 | 0.68 |
| 939 | Putative flagella-related protein FlaH                | 1.37 | 0.09 |
| 940 | Putative flavodoxin                                   | 4.88 | 2.87 |
| 941 | Adenylosuccinate lyase                                | 0.34 | 0.03 |



|     |                                              |      |      |
|-----|----------------------------------------------|------|------|
| 943 | Geranylgeranylglyceryl diphosphate synthase  | 0.4  | 0.05 |
| 945 | Iron-sulfur flavoprotein                     | 1.42 | 0.25 |
| 946 | PUTATIVE NADPH-FLAVIN OXIDOREDUCTASE         | 4.11 | 1.89 |
| 947 | Conserved protein                            | 1.91 | 0.14 |
| 948 | Sensory transduction histidine kinases       | 1.26 | 0.17 |
| 949 | Hypothetical protein                         | 0.7  | 0.25 |
| 950 | ABC transporter. ATP-binding protein         | 0.53 | 0.08 |
| 951 | ABC transporter. permease protein            | 4.63 | 4.67 |
| 952 | Hypothetical protein                         | 2.56 | 1.86 |
| 953 | ABC transporter. ATP-binding protein         | 1.95 | 1.5  |
| 962 | Conserved protein                            | 1.59 | 0.65 |
| 964 | Glutamine synthetase                         | 0.92 | 0.01 |
| 966 | Glutamate synthase. large chain              | 0.24 | 0.16 |
| 967 | Glutamate synthase. large chain              | 0.4  | 0.17 |
| 968 | Glutamate synthase. large chain              | 0.34 | 0.18 |
| 969 | F420 hydrogenase/dehydrogenase. beta subunit | 0.34 | 0.14 |
| 971 | Hypothetical protein                         | 1.75 | 0.23 |
| 977 | F420-dependent NADP reductase                | 0.46 | 0.28 |
| 978 | Hypothetical protein                         | 0.67 | 0.06 |
| 979 | Heterodisulfate reductase. subunit HdrB      | 0.81 | 0.06 |
| 980 | Heterodisulfate reductase. subunit HdrB      | 1.04 | 0.26 |
| 983 | Conserved protein                            | 0.9  | 0.26 |
| 984 | Conserved protein                            | 1.29 | 0.12 |
| 985 | Conserved protein                            | 0.81 | 0.68 |
| 986 | hypothetical protein                         | 1.02 | 0.49 |
| 987 | Conserved protein                            | 0.6  | 0.37 |
| 988 | Conserved protein                            | 0.43 | 0.39 |

|      |                                                                         |      |      |
|------|-------------------------------------------------------------------------|------|------|
| 989  | Conserved protein                                                       | 0.26 | 0.05 |
| 990  | Nucleotide-binding protein                                              | 0.38 | 0.06 |
| 991  | Thiol-disulfide isomerase/thioredoxin                                   | 0.47 | 0.31 |
| 992  | Cytochrome c-type biogenesis protein                                    | 0.73 | 0.09 |
| 994  | Precorrin-8X methylmutase                                               | 2.01 | 0.23 |
| 995  | Precorrin-3B C17-methyltransferase                                      | 1.52 | 0.8  |
| 996  | Cobalamin biosynthesis protein CbiG                                     | 0.93 | 0.75 |
| 997  | Cobalamin biosynthesis protein CbiG                                     | 1.12 | 1.28 |
| 998  | Precorrin-4 C11-methyltransferase                                       | 0.81 | 0.65 |
| 999  | Precorrin-2 C20-methyltransferase                                       | 1.26 | 0.2  |
| 1000 | Precorrin-6Y C5_15-methyltransferase<br>[decarboxylating]               | 1.49 | 0.19 |
| 1002 | 2-Isopropylmalate synthase                                              | 0.84 | 0.22 |
| 1003 | Isocitrate dehydrogenase [NADP]                                         | 0.47 | 0.16 |
| 1004 | Putative molybdenum cofactor biosynthesis protein                       | 0.81 | 0.45 |
| 1005 | HTH DNA-binding protein                                                 | 0.54 | 0.07 |
| 1006 | 26S Proteasome regulatory subunit RPT2/S5                               | 0.78 | 0.68 |
| 1008 | Cell division protein                                                   | 0.58 | 0.49 |
| 1009 | Protein translocase. subunit SecE                                       | 0.06 | 0.04 |
| 1010 | Putative transcription antitermination protein nusG                     | 0.26 | 0.28 |
| 1011 | LSU ribosomal protein L11P                                              | 0.49 | 0.5  |
| 1012 | LSU ribosomal protein L1P                                               | 0.32 | 0.28 |
| 1013 | LSU ribosomal protein L10P                                              | 0.29 | 0.24 |
| 1014 | LSU ribosomal protein L12AE                                             | 0.45 | 0.41 |
| 1015 | Molybdenum cofactor biosynthesis enzyme (Fe-S<br>oxidoreductase family) | 1.46 | 0.22 |
| 1019 | Iron-sulfur cluster-binding protein                                     | 1.91 | 0.27 |

|      |                                               |      |      |
|------|-----------------------------------------------|------|------|
| 1020 | O6-methylguanine-DNA methyltransferase        | 2.81 | 0.57 |
| 1022 | Conserved protein                             | 6.4  | 3.92 |
| 1023 | Conserved protein                             | 3.97 | 1.8  |
| 1024 | Conserved protein                             | 1.82 | 1.32 |
| 1025 | Thiamine biosynthesis protein                 | 0.15 | 0.11 |
| 1026 | Dolichol-phosphate mannosyltransferase        | 0.9  | 0.5  |
| 1027 | Transcription initiation factor TFIIB         | 3.45 | 5.88 |
| 1028 | Transcription initiation factor TFIIB         | 0.55 | 0.14 |
| 1029 | Hypothetical protein                          | 1.35 | 0.21 |
| 1030 | Conserved protein                             | 1.33 | 1.04 |
| 1031 | Chromosome partition protein                  | 1.87 | 0.67 |
| 1032 | Conserved protein                             | 1.94 | 0.22 |
| 1033 | Ferrous iron transport protein B              | 0.93 | 0.16 |
| 1034 | Transcriptional repressor                     | 0.79 | 0.04 |
| 1035 | Amino-acid acetyltransferase                  | 0.45 | 0.26 |
| 1036 | BioY protein                                  | 0.51 | 0.26 |
| 1037 | Cobalt transport ATP-binding protein CbiO     | 0.63 | 0.3  |
| 1038 | Cobalt transport ATP-binding protein CbiO     | 0.64 | 0.37 |
| 1039 | Cobalt ABC transporter, permease protein CbiQ | 0.7  | 0.56 |
| 1040 | Predicted transcriptional regulator           | 2.51 | 1.17 |
| 1041 | Transporter                                   | 2.55 | 0.76 |
| 1042 | Transcriptional regulator                     | 2.29 | 0.02 |
| 1044 | Transposase                                   | 0.89 | 0.5  |
| 1045 | Branched-chain amino acid aminotransferase    | 0.49 | 0.39 |
| 1046 | Molybdopterin biosynthesis protein            | 1.07 | 0.32 |
| 1047 | GTP-binding protein                           | 0.33 | 0.07 |
| 1048 | D-alanine-D-alanine ligase related protein    | 1.55 | 0.08 |

|      |                                                       |       |      |
|------|-------------------------------------------------------|-------|------|
| 1049 | Arsenite permease                                     | 0.83  | 0.5  |
| 1050 | Conserved protein                                     | 0.86  | 0.4  |
| 1051 | Chromosomal protein MC1                               | 1.57  | 1.29 |
| 1053 | Putative Sensory protein                              | 2.79  | 1.52 |
| 1055 | Trimethylamine corrinoid protein                      | 9.98  | 5.8  |
| 1056 | Putative ATP-dependent Na <sup>+</sup> efflux pump    | 1.68  | 0.39 |
| 1057 | ABC transporter. ATP-binding protein                  | 1.77  | 0.7  |
| 1058 | Diaminohydroxyphosphoribosylaminopyrimidine reductase | 2.02  | 0.57 |
| 1059 | Formate hydrogenlyase subunit 3                       | 0.76  | 0.02 |
| 1060 | Formate hydrogenlyase subunit 4                       | 0.43  | 0.01 |
| 1061 | Hydrogenase-4 component E                             | 0.43  | 0.1  |
| 1062 | Hydrogenase-4 component F                             | 0.67  | 0.1  |
| 1063 | Formate hydrogenlyase subunit 5 precursor             | 0.62  | 0.03 |
| 1064 | Formate hydrogenlyase subunit 7                       | 0.53  | 0.14 |
| 1068 | Two-component response regulator                      | 1.06  | 0.43 |
| 1070 | Methylcobalamin:coenzyme M methyltransferase MtaA1    | 0.43  | 0.38 |
| 1071 | Conserved protein                                     | 0.89  | 0.9  |
| 1072 | Conserved protein                                     | 1.03  | 0.78 |
| 1073 | Methanol corrinoid protein MtaC2                      | 8.01  | 3.6  |
| 1074 | Methanol:corrinoid methyltransferase MtaB2            | 13.48 | 1.21 |
| 1075 | Putative regulatory protein                           | 13.69 | 2.22 |
| 1076 | Cation efflux protein                                 | 14.67 | 6.29 |
| 1077 | Conserved protein                                     | 1.91  | 0.92 |
| 1078 | Conserved protein                                     | 1.22  | 0.8  |
| 1079 | Conserved protein                                     | 0.88  | 0.08 |

|      |                                                                         |      |      |
|------|-------------------------------------------------------------------------|------|------|
| 1080 | Conserved protein                                                       | 0.86 | 0.52 |
| 1082 | GTP-binding protein                                                     | 0.95 | 0.45 |
| 1083 | Undecaprenyl pyrophosphate synthetase                                   | 1.01 | 0.34 |
| 1084 | Hypothetical protein                                                    | 0.81 | 0.41 |
| 1086 | Metal-dependent hydrolase                                               | 0.94 | 0.28 |
| 1087 | ABC transporter. ATP-binding protein                                    | 1.89 | 1.04 |
| 1088 | ABC transporter. ATP-binding protein                                    | 1.61 | 0.77 |
| 1089 | Putative DNA integration/recombination/inversion protein                | 1    | 0.49 |
| 1092 | Thiol-disulfide isomerase/thioredoxin related protein                   | 0.83 | 0.13 |
| 1095 | Iron-sulfur-binding protein                                             | 1.72 | 2.04 |
| 1096 | Thermosome. gamma subunit                                               | 0.53 | 0.49 |
| 1098 | Conserved protein                                                       | 1.27 | 0    |
| 1101 | Archaeosine tRNA-ribosyltransferase                                     | 0.33 | 0.25 |
| 1102 | Hypothetical protein                                                    | 0.41 | 0.07 |
| 1103 | Hypothetical protein                                                    | 0.52 | 0.12 |
| 1104 | Oxidoreductase (flavoprotein)                                           | 0.43 | 0.07 |
| 1105 | Metallo cofactor biosynthesis protein (moaA/ nifB /pqqE family)         | 0.82 | 0.04 |
| 1106 | Putative phosphoserine phosphatase                                      | 0.36 | 0.19 |
| 1107 | Putative phosphoserine phosphatase                                      | 0.35 | 0.26 |
| 1108 | F420-dependent methylenetetrahydromethanopterin dehydrogenase           | 0.28 | 0.34 |
| 1110 | Conserved protein                                                       | 1.51 | 0.53 |
| 1112 | Conserved protein                                                       | 0.59 | 0.07 |
| 1113 | Phosphoribosylformimino-5-aminoimidazole carboxamide ribotide isomerase | 0.91 | 0.4  |
| 1114 | Conserved protein                                                       | 0.58 | 0.13 |

|      |                                                       |       |      |
|------|-------------------------------------------------------|-------|------|
| 1115 | Conserved protein                                     | 0.63  | 0.27 |
| 1116 | Hypothetical protein                                  | 10.63 | 7.68 |
| 1118 | Conserved protein                                     | 0.93  | 0.09 |
| 1119 | Conserved protein                                     | 0.79  | 0.17 |
| 1120 | Conserved protein                                     | 1.26  | 0.44 |
| 1121 | Glycosyl transferase                                  | 3.68  | 2.4  |
| 1122 | Oxidoreductase (hypothetical)                         | 1.18  | 0.11 |
| 1123 | Hypothetical protein                                  | 1.92  | 0.34 |
| 1124 | O-antigen translocase                                 | 0.4   | 0.15 |
| 1125 | Conserved protein                                     | 0.45  | 0.23 |
| 1126 | Glycosyl transferase                                  | 1.56  | 0.26 |
| 1128 | Conserved protein                                     | 1.98  | 0.94 |
| 1129 | Conserved protein                                     | 1.43  | 0.14 |
| 1130 | Hypothetical protein                                  | 0.72  | 0.05 |
| 1131 | Hypothetical protein                                  | 1.04  | 0.33 |
| 1132 | UDP-glucose 6-dehydrogenase                           | 0.88  | 0.97 |
| 1133 | UTP--glucose-1-phosphate uridylyltransferase          | 0.69  | 0.38 |
| 1134 | UDP-glucose 4-epimerase                               | 0.85  | 0.4  |
| 1138 | Glycosyl transferase                                  | 0.29  | 0.13 |
| 1139 | Dolichyl-phosphate mannanose synthase related protein | 0.63  | 0.11 |
| 1140 | Dolichyl-phosphate mannanose synthase related protein | 0.73  | 0.02 |
| 1141 | Glycosyl transferase                                  | 0.61  | 0.34 |
| 1142 | Glycosyl transferase                                  | 0.7   | 0.41 |
| 1143 | Glycosyl transferase                                  | 1.06  | 0.58 |
| 1144 | Disaggregase                                          | 1.09  | 0.64 |
| 1146 | Conserved protein                                     | 1.23  | 1.09 |
| 1147 | Dolichol-phosphate mannosyltransferase                | 0.78  | 0.82 |

|      |                                                      |      |      |
|------|------------------------------------------------------|------|------|
| 1148 | Conserved protein                                    | 0.41 | 0.28 |
| 1149 | Conserved protein                                    | 0.61 | 0.31 |
| 1150 | Conserved protein                                    | 0.5  | 0.2  |
| 1151 | Acetyltransferase                                    | 0.91 | 0.17 |
| 1152 | Aspartate aminotransferase                           | 0.88 | 0.21 |
| 1153 | Myo-inositol 2-dehydrogenase                         | 0.7  | 0.21 |
| 1154 | NDP-N-acetyl-D-galactosaminuronic acid dehydrogenase | 0.8  | 0.48 |
| 1155 | Conserved protein                                    | 0.79 | 0.27 |
| 1156 | O-antigen translocase                                | 0.56 | 0.25 |
| 1157 | Conserved protein                                    | 0.71 | 0.33 |
| 1158 | Conserved protein                                    | 0.65 | 0.47 |
| 1159 | Hypothetical protein                                 | 0.56 | 0.07 |
| 1162 | UDP-N-acetylglucosamine 4-epimerase                  | 0.94 | 0.56 |
| 1163 | Nucleotidyltransferase                               | 1.33 | 0.09 |
| 1164 | Putative nucleotidyltransferase                      | 1.28 | 0.07 |
| 1166 | dTDP-4-dehydrorhamnose 3.5-epimerase                 | 0.57 | 0.1  |
| 1169 | Glucose-1-phosphate thymidyltransferase              | 1.31 | 0.14 |
| 1170 | UDP-N-acetylglucosamine 2-epimerase                  | 1.42 | 0.22 |
| 1172 | UDP-N-acetyl-D-mannosamine 6-dehydrogenase           | 1.66 | 0.54 |
| 1173 | Conserved protein                                    | 0.56 | 0.08 |
| 1176 | Conserved transmembrane protein                      | 1.32 | 0    |
| 1179 | Glycosyl transferase                                 | 1.72 | 0.54 |
| 1180 | Oxidoreductase (hypothetical)                        | 1.29 | 0.47 |
| 1181 | Conserved protein                                    | 0.73 | 0.02 |
| 1183 | Dolichyl-phosphate mannose synthase related protein  | 0.67 | 0.25 |
| 1184 | Dolichyl-phosphate mannose synthase related protein  | 1.88 | 0.6  |

|      |                                                    |      |      |
|------|----------------------------------------------------|------|------|
| 1185 | Conserved protein                                  | 0.96 | 0.06 |
| 1189 | Conserved protein                                  | 1    | 0.1  |
| 1190 | Conserved protein                                  | 2.22 | 2.25 |
| 1192 | Transposase                                        | 0.57 | 0.27 |
| 1193 | dTDP-glucose 4.6-dehydratase                       | 0.45 | 0.21 |
| 1194 | Conserved protein                                  | 1.38 | 0.41 |
| 1196 | Conserved protein                                  | 1.44 | 0.51 |
| 1199 | Conserved protein                                  | 0.38 | 0.28 |
| 1200 | SSU ribosomal protein S17E                         | 0.4  | 0.08 |
| 1201 | Dihydrodipicolinate synthase                       | 0.23 | 0.17 |
| 1202 | Dihydrodipicolinate reductase                      | 0.3  | 0.13 |
| 1204 | Conserved protein                                  | 3.56 | 2.87 |
| 1206 | Conserved protein                                  | 2.2  | 0.6  |
| 1210 | Conserved protein                                  | 1.81 | 0.24 |
| 1211 | Conserved protein                                  | 1.4  | 0.51 |
| 1212 | Aspartate carbamoyltransferase. regulatory subunit | 0.71 | 0.33 |
| 1213 | Aspartate carbamoyltransferase. catalytic subunit  | 0.83 | 0.51 |
| 1215 | Hexulose-6-phosphate synthase                      | 1.2  | 0.14 |
| 1218 | GMP synthase [glutamine-hydrolyzing]               | 0.27 | 0.11 |
| 1219 | Fe-S oxidoreductase                                | 0.42 | 0.16 |
| 1220 | Acetylglutamate kinase                             | 0.82 | 0.16 |
| 1221 | Chromosomal protein MC1                            | 0.66 | 0.67 |
| 1222 | Conserved protein                                  | 0.37 | 0.35 |
| 1223 | Conserved protein                                  | 0.92 | 0.2  |
| 1224 | Conserved protein                                  | 1.4  | 0.09 |
| 1225 | F420 hydrogenase/dehydrogenase. beta subunit       | 0.4  | 0.26 |
| 1226 | Glutamyl-tRNA (Gln) amidotransferase. subunit C    | 0.6  | 0.22 |



|      |                                                 |      |      |
|------|-------------------------------------------------|------|------|
| 1228 | Glutamyl-tRNA (Gln) amidotransferase. subunit B | 0.78 | 0.31 |
| 1231 | SAM-dependent methyltransferases                | 1.14 | 0.07 |
| 1234 | Conserved protein                               | 0.75 | 0.06 |
| 1235 | 5-Methylcytosine-specific restriction enzyme    | 1.11 | 0.46 |
| 1236 | Protease HTPX                                   | 0.77 | 0.33 |
| 1237 | Thymidylate synthase                            | 0.86 | 0.01 |
| 1238 | 3-Phosphoshikimate 1-carboxyvinyltransferase    | 0.95 | 0.12 |
| 1240 | Methyl-coenzyme M reductase. alpha subunit      | 0.53 | 0.29 |
| 1241 | Methyl-coenzyme M reductase. gamma subunit      | 0.38 | 0.35 |
| 1242 | Methyl-coenzyme M reductase. operon protein C   | 0.31 | 0.28 |
| 1243 | Methyl-coenzyme M reductase. operon protein D   | 0.31 | 0.3  |
| 1244 | Methyl-coenzyme M reductase. beta subunit       | 0.42 | 0.35 |
| 1245 | Conserved protein                               | 0.68 | 0.23 |
| 1246 | DNA polymerase II large subunit                 | 1.28 | 0.54 |
| 1247 | Conserved protein                               | 0.72 | 0.06 |
| 1248 | SUA5 protein                                    | 0.85 | 0.22 |
| 1249 | Ribulose bisphosphate carboxylase large chain   | 1.06 | 0.07 |
| 1252 | Conserved protein                               | 0.75 | 0.18 |
| 1253 | Cation transporter                              | 1.26 | 1.14 |
| 1254 | Putative heat shock protein                     | 1.2  | 0.1  |
| 1255 | Putative heat shock protein                     | 1.49 | 0    |
| 1256 | CdcH protein                                    | 1.46 | 0.81 |
| 1257 | Transcriptional regulator. ArsR family          | 1.62 | 0.77 |
| 1261 | Conserved protein                               | 0.72 | 0.35 |
| 1262 | Xanthine-guanine phosphoribosyltransferase      | 0.62 | 0.18 |
| 1264 | Hypothetical protein                            | 1.71 | 0.31 |
| 1265 | Hypothetical protein                            | 1.45 | 0.09 |

|      |                                                     |      |      |
|------|-----------------------------------------------------|------|------|
| 1266 | Conserved protein                                   | 2.37 | 1.71 |
| 1267 | Signal recognition particle. subunit FFH/SRP54      | 1.14 | 0.04 |
| 1268 | Hypothetical protein                                | 1.25 | 0.19 |
| 1270 | GMP synthase [glutamine-hydrolyzing]                | 0.35 | 0.08 |
| 1271 | 2-Dehydro-3-desoxyphosphoheptanote aldolase         | 0.34 | 0.17 |
| 1272 | 3-Dehydroquinate synthase                           | 0.42 | 0.21 |
| 1273 | 3-Dehydroquinate dehydratase                        | 0.38 | 0.33 |
| 1274 | Shikimate 5-dehydrogenase                           | 0.36 | 0.19 |
| 1275 | Prephenate dehydrogenase                            | 0.41 | 0.18 |
| 1276 | Hypothetical protein                                | 0.73 | 0.54 |
| 1277 | Methyltransferase                                   | 3.32 | 2.61 |
| 1278 | Triosephosphate isomerase                           | 0.48 | 0.27 |
| 1279 | Orotidine 5'-phosphate decarboxylase family protein | 0.39 | 0.14 |
| 1281 | Conserved protein                                   | 6.67 | 0.89 |
| 1282 | Conserved protein                                   | 3.56 | 2.87 |
| 1284 | 2-Isopropylmalate synthase                          | 0.28 | 0.13 |
| 1285 | Sec-independent transport protein TatD              | 0.29 | 0.14 |
| 1286 | hypothetical protein                                | 0.3  | 0.04 |
| 1287 | Fe-S oxidoreductase                                 | 0.53 | 0.26 |
| 1288 | Conserved protein                                   | 0.9  | 0.2  |
| 1289 | Conserved protein                                   | 1    | 0.24 |
| 1290 | Fe-S oxidoreductase                                 | 0.45 | 0.01 |
| 1291 | (S)-2-Hydroxy-acid dehydrogenase                    | 0.56 | 0.26 |
| 1292 | Archaeosine tRNA-ribosyltransferase                 | 0.29 | 0.04 |
| 1293 | Ribosomal protein S18 alanine acetyltransferase     | 0.44 | 0.07 |
| 1294 | Conserved protein                                   | 1.79 | 2.72 |
| 1295 | DNA primase                                         | 0.58 | 0.4  |

|      |                                                               |      |      |
|------|---------------------------------------------------------------|------|------|
| 1296 | NADH oxidase                                                  | 0.8  | 0.4  |
| 1297 | RNA 3'-terminal phosphate cyclase                             | 0.74 | 0.29 |
| 1299 | Replication factor-A protein                                  | 0.53 | 0.07 |
| 1301 | Conserved protein                                             | 1.15 | 0.68 |
| 1302 | Conserved protein                                             | 1.63 | 1    |
| 1303 | Conserved protein                                             | 0.84 | 0.88 |
| 1304 | Conserved protein                                             | 0.48 | 0.4  |
| 1305 | Conserved protein                                             | 0.78 | 0.64 |
| 1306 | HTH DNA-binding protein                                       | 0.49 | 0.33 |
| 1307 | Conserved protein                                             | 1.69 | 0.67 |
| 1309 | Protein translation elongation factor 1A (EF-1A)              | 0.39 | 0.17 |
| 1310 | Hypothetical protein                                          | 0.4  | 0.3  |
| 1311 | Conserved protein                                             | 0.56 | 0.42 |
| 1312 | Conserved protein                                             | 0.47 | 0.06 |
| 1313 | UMP/CMP kinase related protein                                | 0.39 | 0.18 |
| 1314 | Origin recognition complex subunit                            | 0.53 | 0.18 |
| 1317 | Glutamate decarboxylase                                       | 0.61 | 0.09 |
| 1318 | Conserved protein                                             | 2.07 | 0.69 |
| 1319 | Pheromone shutdown protein                                    | 0.67 | 0.08 |
| 1320 | Conserved protein                                             | 1.82 | 0.62 |
| 1321 | Formylmethanofuran--tetrahydromethanopterin formyltransferase | 0.49 | 0.39 |
| 1324 | Chemotaxis protein methyltransferase CheR                     | 0.78 | 0.38 |
| 1326 | Chemotaxis receptor methylesterase. CheB                      | 1.26 | 0.33 |
| 1327 | Chemotaxis protein CheY                                       | 1.29 | 0.17 |
| 1328 | Two-component response regulator                              | 4.07 | 1.03 |
| 1329 | Methyl-accepting chemotaxis protein                           | 2.54 | 1.47 |

|      |                                                                       |      |      |
|------|-----------------------------------------------------------------------|------|------|
| 1332 | Iron-dependent repressor                                              | 7.13 | 7.07 |
| 1333 | Zinc ABC transporter. zinc-binding protein                            | 8.22 | 6.73 |
| 1334 | Zinc ABC transporter. ATP-binding protein                             | 3.3  | 1.73 |
| 1335 | Zinc ABC transporter. permease protein                                | 2.4  | 1.72 |
| 1336 | Hypothetical protein                                                  | 0.52 | 0.09 |
| 1337 | Hypothetical protein                                                  | 1.09 | 0.22 |
| 1339 | Pyruvate:ferredoxin oxidoreductase. beta subunit                      | 0.26 | 0.11 |
| 1340 | Pyruvate:ferredoxin oxidoreductase. alpha subunit                     | 0.25 | 0.18 |
| 1341 | Pyruvate:ferredoxin oxidoreductase. delta subunit                     | 0.24 | 0.15 |
| 1342 | Pyruvate:ferredoxin oxidoreductase. gamma subunit                     | 0.26 | 0.17 |
| 1344 | Signal sequence peptidase                                             | 0.88 | 0.28 |
| 1345 | DNA polymerase II small subunit                                       | 0.87 | 0.33 |
| 1346 | Fe-S oxidoreductase                                                   | 0.39 | 0.16 |
| 1347 | Peptide chain release factor                                          | 0.38 | 0.1  |
| 1348 | Arginyl-tRNA synthetase                                               | 0.4  | 0.13 |
| 1349 | Conserved protein                                                     | 0.66 | 0.03 |
| 1352 | 5-Methyltetrahydropteroyltriglutamate--homocysteine methyltransferase | 1.47 | 0.19 |
| 1353 | Conserved protein                                                     | 0.63 | 0.32 |
| 1354 | Hypothetical protein                                                  | 0.98 | 0.16 |
| 1355 | Conserved protein                                                     | 0.37 | 0.36 |
| 1356 | Tram domain protein                                                   | 0.37 | 0.33 |
| 1357 | Tram domain protein                                                   | 0.35 | 0.32 |
| 1358 | Putative methyltransferase                                            | 0.37 | 0.35 |
| 1359 | Hypothetical protein                                                  | 0.36 | 0.22 |
| 1360 | ABC transporter. ATP-binding protein                                  | 0.6  | 0.36 |
| 1361 | ABC transporter. permease protein                                     | 1.57 | 0.16 |

|      |                                                                       |      |      |
|------|-----------------------------------------------------------------------|------|------|
| 1362 | ABC transporter. periplasmic binding protein                          | 0.84 | 0.84 |
| 1364 | S-layer protein                                                       | 0.81 | 0.42 |
| 1365 | Thiamin-monophosphate kinase                                          | 0.6  | 0.4  |
| 1366 | Ribonucleoside-triphosphate reductase activating enzyme               | 0.87 | 0.69 |
| 1367 | Anaerobic ribonucleoside-triphosphate reductase                       | 1.74 | 0.43 |
| 1368 | Glutaredoxin-like protein                                             | 0.59 | 0.45 |
| 1370 | Myo-inositol-1-phosphate synthase                                     | 0.57 | 0.33 |
| 1371 | Archaeal protein Translation Initiation Factor 2B subunit 1 (aIF-2B1) | 0.39 | 0.06 |
| 1372 | Hypothetical protein                                                  | 0.42 | 0.29 |
| 1373 | Hydrolase of the alpha/beta superfamily                               | 0.53 | 0.33 |
| 1374 | DNA mismatch repair protein                                           | 3.28 | 3.85 |
| 1375 | Polyphosphate kinase                                                  | 1.14 | 0.43 |
| 1376 | Exopolyphosphatase                                                    | 0.62 | 0.03 |
| 1377 | Hypothetical protein                                                  | 0.98 | 0.2  |
| 1378 | Origin recognition complex subunit                                    | 1.85 | 0.14 |
| 1379 | Thermosome_ alpha subunit                                             | 0.62 | 0.55 |
| 1380 | Chaperone protein                                                     | 1.64 | 1.27 |
| 1381 | Chaperone protein                                                     | 1.94 | 1.05 |
| 1382 | Conserved protein                                                     | 0.39 | 0.13 |
| 1383 | Phenylalanyl-tRNA synthetase. alpha chain                             | 0.38 | 0.03 |
| 1384 | Superfamily I DNA and RNA helicase                                    | 0.84 | 0.31 |
| 1385 | Conserved protein                                                     | 0.51 | 0.05 |
| 1386 | Hypothetical protein                                                  | 0.51 | 0    |
| 1387 | ATP-dependent RNA helicase                                            | 1.1  | 0.61 |
| 1388 | Glycyl-tRNA synthetase                                                | 0.47 | 0.15 |

|      |                                                      |      |      |
|------|------------------------------------------------------|------|------|
| 1389 | Conserved protein                                    | 0.85 | 0.36 |
| 1390 | Probable transcriptional regulator                   | 0.35 | 0.15 |
| 1391 | Survival protein                                     | 0.48 | 0.21 |
| 1392 | Hypothetical protein                                 | 0.65 | 0.29 |
| 1393 | Molybdenum cofactor biosynthesis protein A           | 0.62 | 0.39 |
| 1394 | Cobyrinic acid a.c-diamide synthase                  | 0.54 | 0.19 |
| 1395 | Conserved protein                                    | 1.65 | 0.22 |
| 1396 | Conserved protein                                    | 0.51 | 0.44 |
| 1397 | DNA polymerase sliding clamp                         | 0.32 | 0.27 |
| 1398 | DNA-directed RNA polymerase subunit M                | 0.2  | 0.07 |
| 1399 | MutT-like protein                                    | 0.25 | 0.07 |
| 1401 | Hypothetical protein                                 | 0.52 | 0.27 |
| 1403 | CDP-diacylglycerol--serine O-phosphatidyltransferase | 0.5  | 0.51 |
| 1404 | Conserved protein                                    | 0.74 | 0.06 |
| 1405 | Histidinol-phosphate aminotransferase                | 0.8  | 0.19 |
| 1406 | Acetylornithine aminotransferase                     | 0.88 | 0.06 |
| 1407 | Conserved protein                                    | 0.79 | 0.05 |
| 1408 | Archaeosine tRNA-ribosyltransferase                  | 0.26 | 0.05 |
| 1409 | Hypothetical protein                                 | 0.32 | 0.16 |
| 1410 | Hypothetical protein                                 | 0.47 | 0.18 |
| 1411 | Hypothetical protein                                 | 1.35 | 0.06 |
| 1412 | Hypothetical protein                                 | 1.34 | 0.3  |
| 1414 | Conserved protein                                    | 1.06 | 0.35 |
| 1415 | Conserved protein                                    | 1.08 | 0.27 |
| 1416 | Phosphoribosylformylglycinamide cyclo-ligase         | 0.31 | 0.1  |
| 1417 | Aspartate kinase                                     | 0.29 | 0.16 |
| 1418 | 3-Phosphonopyruvate decarboxylase                    | 0.47 | 0.02 |

|      |                                                    |       |      |
|------|----------------------------------------------------|-------|------|
| 1419 | Small heat shock protein                           | 2.27  | 1.38 |
| 1420 | Hypothetical protein                               | 1.59  | 0.74 |
| 1421 | Conserved protein                                  | 0.47  | 0    |
| 1422 | Hypothetical protein                               | 0.43  | 0.11 |
| 1423 | dCMP deaminase                                     | 0.48  | 0.11 |
| 1424 | Protein translocase. subunit SecF                  | 0.57  | 0.42 |
| 1425 | Protein translocase. subunit SecD                  | 0.77  | 0.06 |
| 1426 | REPLICATION FACTOR C SUBUNIT                       | 0.74  | 0.22 |
| 1427 | Conserved protein                                  | 0.81  | 0.41 |
| 1430 | Transposase                                        | 0.82  | 0.34 |
| 1433 | Hypothetical protein                               | 1.01  | 0.14 |
| 1434 | Monomethylamine permease MtmP (C-terminal domain)  | 1.2   | 0.12 |
| 1435 | Monomethylamine permease MtmP                      | 1.38  | 1.1  |
| 1437 | Monomethylamine:corrinoid methyltransferase MtmB1  | 13.89 | 9.56 |
| 1438 | Monomethylamine corrinoid protein MtmC1            | 12.35 | 7.98 |
| 1439 | Methylcobalamin:coenzyme M methyltransferase MtbA2 | 0.69  | 0.41 |
| 1440 | Conserved protein                                  | 2.28  | 0.85 |
| 1441 | Inorganic pyrophosphatase                          | 0.22  | 0.08 |
| 1443 | PylC (Pyrrolysine synthesis)                       | 4.21  | 0.27 |
| 1445 | Lysly-tRNA synthetase (PylS)                       | 2.28  | 0.65 |
| 1447 | Hypothetical protein                               | 0.24  | 0.1  |
| 1448 | Hypothetical protein                               | 1.02  | 0.14 |
| 1449 | Conserved protein                                  | 0.8   | 0.06 |
| 1450 | Fe-S oxidoreductase                                | 0.92  | 0.27 |
| 1451 | Universal stress protein                           | 2     | 0.53 |
| 1452 | Universal stress protein                           | 2.5   | 1.84 |

|      |                                                                |      |      |
|------|----------------------------------------------------------------|------|------|
| 1454 | Universal stress protein                                       | 2.12 | 0.66 |
| 1455 | Universal stress protein                                       | 1.45 | 1.06 |
| 1456 | Universal stress protein                                       | 2.38 | 1.32 |
| 1457 | Conserved protein                                              | 0.52 | 0.01 |
| 1458 | Conserved protein                                              | 0.73 | 0.22 |
| 1459 | Hypothetical protein                                           | 1.43 | 0.33 |
| 1461 | Cation-transporting ATPase                                     | 2.23 | 1.17 |
| 1462 | Hypothetical protein                                           | 2.3  | 0.17 |
| 1469 | Conserved protein                                              | 1.27 | 0.03 |
| 1470 | Phenylalanyl-tRNA synthetase. alpha chain                      | 0.44 | 0.04 |
| 1471 | Tryptophanyl-tRNA synthetase                                   | 0.29 | 0.06 |
| 1472 | Putative nucleotidytransferase                                 | 0.84 | 0.03 |
| 1473 | Conserved protein                                              | 0.78 | 0.08 |
| 1474 | Metallo cofactor biosynthesis protein (moaA/ nifB /pqqE family | 1.21 | 0.17 |
| 1475 | Probable translation initiation factor 2 beta subunit          | 0.26 | 0.2  |
| 1476 | LSU ribosomal protein L10E                                     | 0.24 | 0.18 |
| 1477 | Pyruvate formate-lyase activating enzyme                       | 1.07 | 0.25 |
| 1478 | Molybdenum cofactor biosynthesis protein B                     | 0.76 | 0    |
| 1479 | SWF/SNF FAMILY HELICASE                                        | 1.03 | 0.13 |
| 1480 | Conserved protein                                              | 0.95 | 0.49 |
| 1484 | Conserved protein                                              | 1.69 | 0.07 |
| 1485 | Conserved protein                                              | 0.41 | 0    |
| 1486 | Alanyl-tRNA synthetase                                         | 0.67 | 0.3  |
| 1487 | Methyltransferase                                              | 0.41 | 0.08 |
| 1489 | 3-Isopropylmalate dehydrogenase                                | 0.32 | 0.12 |
| 1490 | 3-Isopropylmalate dehydratase                                  | 0.24 | 0.13 |



|      |                                                                            |       |       |
|------|----------------------------------------------------------------------------|-------|-------|
| 1491 | Putative nucleotidytransferase                                             | 0.98  | 0.85  |
| 1492 | Conserved protein                                                          | 4.76  | 0.31  |
| 1493 | Conserved protein                                                          | 0.48  | 0.14  |
| 1494 | Hypothetical transcriptional regulatory protein                            | 0.87  | 0.07  |
| 1495 | tRNA pseudouridine synthase A                                              | 0.7   | 0.2   |
| 1496 | Putative methyltransferase                                                 | 0.82  | 0.42  |
| 1497 | Conserved protein                                                          | 0.53  | 0.41  |
| 1498 | Hypothetical protein                                                       | 1     | 0.28  |
| 1499 | Methionine aminopeptidase                                                  | 1.24  | 0.19  |
| 1500 | Xaa-Pro aminopeptidase                                                     | 0.97  | 0.39  |
| 1502 | S-adenosylmethionine synthetase                                            | 0.57  | 0.24  |
| 1503 | ATP phosphoribosyltransferase                                              | 0.54  | 0.3   |
| 1504 | Phosphoribosylformimino-5-aminoimidazole<br>carboxamide ribotide isomerase | 0.9   | 0.17  |
| 1505 | Imidazoleglycerol-phosphate dehydratase                                    | 0.55  | 0.16  |
| 1506 | FdhD protein                                                               | 1.22  | 0.49  |
| 1508 | Hypothetical protein                                                       | 0.61  | 0.05  |
| 1509 | Hypothetical protein                                                       | 1.22  | 0.77  |
| 1511 | Hypothetical protein                                                       | 0.84  | 0.63  |
| 1513 | Hypothetical protein                                                       | 11.44 | 15.53 |
| 1515 | Transporter                                                                | 1.04  | 0.52  |
| 1517 | Cysteine desulfurase                                                       | 0.72  | 0     |
| 1518 | Conserved protein                                                          | 0.36  | 0.21  |
| 1519 | Amino-acid acetyltransferase                                               | 1.02  | 0.33  |
| 1520 | Conserved protein                                                          | 1.13  | 0.48  |
| 1521 | Phosphoglucomutase/phosphomannomutase                                      | 1.03  | 0.63  |
| 1522 | Putative FeS oxidoreductase                                                | 0.65  | 0.39  |

|      |                                                                    |      |      |
|------|--------------------------------------------------------------------|------|------|
| 1523 | Zinc metalloprotease                                               | 0.92 | 0.16 |
| 1524 | Conserved protein                                                  | 0.85 | 0.05 |
| 1525 | Conserved protein                                                  | 0.55 | 0.25 |
| 1526 | 4-Hydroxybenzoate decarboxylase                                    | 0.82 | 0.02 |
| 1527 | Citrate (si) synthase                                              | 0.59 | 0.53 |
| 1528 | Aconitate hydratase                                                | 0.6  | 0.21 |
| 1529 | Hypothetical protein                                               | 0.89 | 0.38 |
| 1530 | Hypothetical protein                                               | 0.85 | 0.15 |
| 1531 | Putative regularatory protein                                      | 1.05 | 0.19 |
| 1533 | Molybdopterin biosynthesis MoeB protein/ThiF protein               | 1.28 | 0.03 |
| 1535 | L-fuculose phosphate aldolase                                      | 0.6  | 0.33 |
| 1536 | CDP-diacylglycerol--glycerol-3-phosphate 3-phosphatidyltransferase | 0.64 | 0.35 |
| 1537 | Conserved protein                                                  | 0.62 | 0.4  |
| 1538 | Replication factor c subunit                                       | 0.62 | 0.13 |
| 1539 | Hypothetical protein                                               | 1.25 | 0.8  |
| 1540 | Tetrahydromethanopterin S-methyltransferase. subunit H             | 0.35 | 0.23 |
| 1541 | Tetrahydromethanopterin S-methyltransferase. subunit G             | 0.3  | 0.15 |
| 1542 | Tetrahydromethanopterin S-methyltransferase. subunit F             | 0.27 | 0.25 |
| 1543 | Tetrahydromethanopterin S-methyltransferase. subunit A             | 0.32 | 0.28 |
| 1544 | Tetrahydromethanopterin S-methyltransferase. subunit B             | 0.27 | 0.19 |
| 1545 | Tetrahydromethanopterin S-methyltransferase. subunit C             | 0.32 | 0.21 |
| 1546 | Tetrahydromethanopterin S-methyltransferase. subunit D             | 0.32 | 0.28 |
| 1547 | Tetrahydromethanopterin S-methyltransferase. subunit E             | 0.4  | 0.19 |
| 1548 | Protoglobin-like protein                                           | 0.32 | 0.21 |
| 1549 | Sodium/proline symporter                                           | 0.28 | 0.08 |
| 1550 | putative molybdenum transport protein ModA                         | 0.51 | 0.26 |

|      |                                                      |      |      |
|------|------------------------------------------------------|------|------|
| 1551 | Hypothetical protein                                 | 0.5  | 0.08 |
| 1552 | Hypothetical protein                                 | 0.32 | 0.21 |
| 1553 | TRANSPORTER. RND superfamily                         | 0.58 | 0.13 |
| 1554 | Transcriptional regulator                            | 0.46 | 0.04 |
| 1555 | Putative metal dependent hydrolase                   | 0.64 | 0.02 |
| 1556 | Conserved protein                                    | 0.38 | 0.05 |
| 1557 | Signal recognition particle SEC65 subunit            | 0.8  | 0.21 |
| 1558 | Hypothetical protein                                 | 1.69 | 0.34 |
| 1559 | Hypothetical protein                                 | 0.74 | 0.59 |
| 1561 | ABC transporter. tungsten-binding protein            | 1.22 | 0.51 |
| 1562 | TUNGSTEN TRANSPORTER. PERMEASE PROTEIN               | 4.71 | 4.2  |
| 1563 | TUNGSTEN TRANSPORTER. ATP BINDING PROTEIN            | 0.86 | 0.38 |
| 1564 | Molybdenum formylmethanofuran dehydrogenase. subunit | 0.44 | 0.34 |
| 1565 | Molybdenum formylmethanofuran dehydrogenase. subunit | 0.41 | 0.31 |
| 1566 | Molybdenum formylmethanofuran dehydrogenase. subunit | 0.48 | 0.21 |
| 1567 | Molybdenum formylmethanofuran dehydrogenase. subunit | 0.41 | 0.27 |
| 1568 | Molybdenum formylmethanofuran dehydrogenase. subunit | 0.52 | 0.28 |
| 1569 | Molybdenum formylmethanofuran dehydrogenase. subunit | 0.62 | 0.35 |
| 1570 | Conserved protein                                    | 2.27 | 0.5  |
| 1571 | Conserved protein                                    | 2.38 | 0.5  |
| 1572 | Conserved protein                                    | 0.86 | 0.4  |
| 1574 | Conserved protein                                    | 2.21 | 1.54 |

|      |                                                     |       |       |
|------|-----------------------------------------------------|-------|-------|
| 1575 | Conserved protein                                   | 1.76  | 0.71  |
| 1576 | Conserved protein                                   | 0.66  | 0.46  |
| 1577 | Nicotinate-nucleotide pyrophosphorylase             | 0.48  | 0.08  |
| 1578 | Molybdate ABC transporter. ATP-binding protein      | 0.45  | 0.08  |
| 1579 | Molybdate ABC transporter. permease protein         | 0.5   | 0.25  |
| 1581 | Putative NAD(P)H oxidoreductase                     | 1.79  | 0.76  |
| 1582 | Iron-sulfur flavoprotein                            | 2.11  | 1.3   |
| 1583 | Conserved protein                                   | 1.88  | 1.57  |
| 1584 | NADPH-flavin oxidoreductase                         | 1.8   | 0.37  |
| 1585 | Iron-sulfur flavoprotein                            | 2.33  | 0.57  |
| 1586 | Transcriptional regulator. MarR family              | 0.77  | 0.07  |
| 1587 | DNA repair helicase                                 | 0.95  | 0.28  |
| 1588 | Surface layer protein (putative)                    | 1.1   | 0.81  |
| 1589 | Surface layer protein (putative)                    | 1.77  | 0.66  |
| 1590 | Conserved protein                                   | 1.32  | 1.01  |
| 1591 | Conserved protein                                   | 3.07  | 1.99  |
| 1592 | Conserved protein                                   | 0.58  | 0.21  |
| 1593 | Probable RNA processing protein                     | 0.43  | 0.05  |
| 1594 | Fibrillarlin                                        | 0.39  | 0.17  |
| 1595 | Conserved protein                                   | 15.06 | 15.88 |
| 1596 | Conserved protein                                   | 79.98 | 91.13 |
| 1597 | Integral membrane protein                           | 32.61 | 25.37 |
| 1598 | Conserved protein                                   | 24.92 | 23.98 |
| 1601 | Cobalamin biosynthesis protein CobN                 | 49.82 | 57.2  |
| 1603 | Conserved protein                                   | 0.44  | 0.29  |
| 1604 | Tungsten formylmethanofuran dehydrogenase subunit E | 0.41  | 0.3   |
| 1605 | Conserved protein                                   | 0.69  | 0.14  |

|      |                                                                    |      |      |
|------|--------------------------------------------------------------------|------|------|
| 1606 | Archaeal protein Translation Initiation Factor 2B subunit 2aIF-2B2 | 1.28 | 0.1  |
| 1607 | Acetyltransferase                                                  | 1.43 | 0.02 |
| 1608 | ABC transporter. ATP-binding protein                               | 1.46 | 0.25 |
| 1610 | Hypothetical protein                                               | 1.17 | 0.2  |
| 1611 | Uridylate kinase                                                   | 0.4  | 0.22 |
| 1612 | Conserved protein                                                  | 5.47 | 6.14 |
| 1614 | Transcriptional regulator. TetR family                             | 0.75 | 0.16 |
| 1615 | Oxidoreductase. aldo/keto family                                   | 0.9  | 0.03 |
| 1616 | Phosphoribosylaminoimidazole carboxylase                           | 0.56 | 0.29 |
| 1617 | Conserved protein                                                  | 0.72 | 0.23 |
| 1618 | Aspartate-semialdehyde dehydrogenase                               | 0.39 | 0.27 |
| 1619 | Ferredoxin                                                         | 0.48 | 0.5  |
| 1620 | Conserved protein                                                  | 0.94 | 0.21 |
| 1621 | Cobalamin biosynthesis protein CobW                                | 0.43 | 0.31 |
| 1625 | Conserved protein                                                  | 0.94 | 0.1  |
| 1626 | Conserved protein                                                  | 0.56 | 0.12 |
| 1627 | Fructose-bisphosphate aldolase                                     | 0.31 | 0.09 |
| 1631 | IRON-SULFUR FLAVOPROTEIN                                           | 2.18 | 0.06 |
| 1632 | Iron-sulfur flavoprotein                                           | 1.06 | 0.06 |
| 1633 | ABC transporter. ATP-binding protein                               | 1.16 | 0.01 |
| 1634 | Transcriptional regulator                                          | 1.08 | 0.12 |
| 1635 | Beta-phosphoglucomutase /glucose-1-phosphate phosphodismutase      | 1.33 | 0.01 |
| 1636 | Glycosyltransferase                                                | 1.56 | 0.65 |
| 1645 | Hypothetical protein                                               | 0.65 | 0.13 |
| 1647 | Methanol:corrinoid methyltransferase MtaB1                         | 0.9  | 0.91 |

|      |                                                                    |       |       |
|------|--------------------------------------------------------------------|-------|-------|
| 1648 | Methanol corrinoid protein MtaC1                                   | 1.11  | 1.25  |
| 1649 | Conserved protein                                                  | 0.48  | 0.33  |
| 1650 | Conserved protein                                                  | 0.35  | 0.22  |
| 1651 | Conserved protein                                                  | 0.57  | 0.24  |
| 1652 | Ferredoxin                                                         | 0.74  | 0.16  |
| 1655 | Conserved protein                                                  | 1.26  | 0.5   |
| 1660 | Mg <sup>2+</sup> transporter MgtE                                  | 1.79  | 0.95  |
| 1661 | Type I restriction-modification system restriction subunit         | 3.12  | 2.9   |
| 1663 | Conserved protein                                                  | 1.19  | 0.37  |
| 1664 | Conserved protein                                                  | 0.77  | 0.17  |
| 1665 | Conserved protein                                                  | 0.82  | 0.18  |
| 1667 | Type I restriction-modification system specificity subunit         | 0.91  | 0.33  |
| 1669 | Type I restriction-modification system methylation subunit         | 0.79  | 0.4   |
| 1671 | Hypothetical sensory transduction histidine kinase                 | 2.42  | 0.79  |
| 1674 | Hypothetical protein                                               | 0.39  | 0.05  |
| 1675 | Conserved protein                                                  | 0.37  | 0.14  |
| 1676 | Conserved protein                                                  | 0.91  | 0.46  |
| 1678 | Conserved protein                                                  | 1.67  | 0.57  |
| 1680 | Precorrin-6Y C5.15-methyltransferase [decarboxylating]             | 0.67  | 0.17  |
| 1681 | CbiD protein                                                       | 0.6   | 0.02  |
| 1682 | DNA mismatch repair protein                                        | 0.77  | 0.07  |
| 1683 | DNA mismatch repair protein                                        | 0.71  | 0     |
| 1685 | CDP-diacylglycerol--glycerol-3-phosphate 3-phosphatidyltransferase | 1.34  | 0.45  |
| 1687 | Dimethylamine corrinoid protein MtbC1                              | 21.76 | 26.54 |
| 1688 | Trimethylamine:corrinoid methyltransferase MttB1                   | 28.17 | 31.85 |

|      |                                                                      |       |       |
|------|----------------------------------------------------------------------|-------|-------|
| 1689 | Trimethylamine:corrionid methyltransferase MttB1 (C-terminal domain) | 36.26 | 28.53 |
| 1690 | Trimethylamine corrionid protein MttC1                               | 54.46 | 11.25 |
| 1691 | Trimethylamine permease                                              | 52.95 | 17.19 |
| 1692 | Conserved protein                                                    | 29.81 | 15.44 |
| 1695 | Conserved protein                                                    | 1.94  | 0.4   |
| 1696 | Lysyl-tRNA synthetase. class I                                       | 0.71  | 0.1   |
| 1697 | LysM                                                                 | 0.78  | 0.17  |
| 1698 | Conserved protein                                                    | 1.57  | 0.28  |
| 1699 | Conserved protein                                                    | 0.31  | 0.16  |
| 1701 | Putative nucleoside-diphosphate-sugar epimerase                      | 0.79  | 0.08  |
| 1702 | Conserved protein                                                    | 3.3   | 2.74  |
| 1703 | Conserved protein                                                    | 0.46  | 0.11  |
| 1704 | Histidine biosynthesis protein                                       | 0.56  | 0.1   |
| 1705 | Conserved protein                                                    | 1.55  | 0.53  |
| 1706 | Protein-L-isoaspartate O-methyltransferase                           | 1.24  | 0.31  |
| 1707 | Conserved protein                                                    | 0.76  | 0.01  |
| 1709 | Conserved protein                                                    | 0.58  | 0.24  |
| 1710 | 3.4 Dihydroxy-2-butanone 4-phosphate synthase                        | 0.65  | 0     |
| 1712 | Chorismate synthase                                                  | 0.75  | 0.07  |
| 1713 | Conserved protein                                                    | 2.43  | 1.15  |
| 1717 | Conserved protein                                                    | 0.86  | 0.49  |
| 1718 | Conserved protein                                                    | 0.84  | 0.61  |
| 1726 | Heme biosynthesis protein                                            | 0.51  | 0.04  |
| 1728 | Heme biosynthesis protein                                            | 0.36  | 0.07  |
| 1729 | Transposase                                                          | 0.59  | 0.23  |
| 1736 | Transposase                                                          | 9.66  | 12.58 |

|      |                                          |      |      |
|------|------------------------------------------|------|------|
| 1740 | S-layer protein                          | 0.55 | 0.24 |
| 1741 | Glutamyl-tRNA reductase                  | 0.89 | 0.03 |
| 1742 | Delta-aminolevulinic acid dehydratase    | 0.82 | 0.02 |
| 1743 | Glutamate-1-semialdehyde 2.1-aminomutase | 0.87 | 0.08 |
| 1744 | Porphobilinogen deaminase                | 0.79 | 0.12 |
| 1745 | Dihydroorotate dehydrogenase             | 0.9  | 0.2  |
| 1747 | 2-Hydroxy-2.4-diene-1.7-dioate isomerase | 1.22 | 0.37 |
| 1748 | Conserved protein                        | 1.13 | 0.04 |
| 1749 | Glutamyl-tRNA synthetase                 | 0.73 | 0.24 |
| 1750 | Conserved protein                        | 0.65 | 0.26 |
| 1752 | Conserved protein                        | 0.61 | 0.04 |
| 1753 | D-3-phosphoglycerate dehydrogenase       | 0.63 | 0.22 |
| 1754 | Conserved protein                        | 0.96 | 0.25 |
| 1755 | LSU ribosomal protein L18E               | 0.26 | 0.23 |
| 1756 | LSU ribosomal protein L13P               | 0.27 | 0.25 |
| 1757 | SSU ribosomal protein S9P                | 0.27 | 0.24 |
| 1758 | DNA-directed RNA polymerase subunit N    | 0.26 | 0.2  |
| 1759 | DNA-directed RNA polymerase subunit K    | 0.31 | 0.24 |
| 1760 | SSU ribosomal protein S2P                | 0.44 | 0.25 |
| 1761 | Conserved protein                        | 0.38 | 0.25 |
| 1762 | Mevalonate kinase                        | 0.57 | 0.11 |
| 1763 | Archaeal kinase                          | 0.9  | 0.06 |
| 1764 | Isopentenyl-diphosphate delta-isomerase  | 0.97 | 0.17 |
| 1766 | Zn-dependent hydrolase                   | 0.56 | 0.26 |
| 1767 | Geranyltranstransferase                  | 0.56 | 0.33 |
| 1768 | Hypothetical protein                     | 2.26 | 0.68 |
| 1770 | Pyruvate. phosphate dikinase             | 0.3  | 0.17 |



|      |                                                             |      |      |
|------|-------------------------------------------------------------|------|------|
| 1771 | Hypothetical protein                                        | 0.45 | 0.39 |
| 1772 | Transcription initiation factor IIB                         | 0.65 | 0.5  |
| 1773 | Conserved protein                                           | 1.62 | 0.44 |
| 1774 | Hypothetical protein                                        | 1.05 | 0.62 |
| 1775 | Methyltransferase                                           | 0.34 | 0.18 |
| 1776 | Thiol-specific antioxidant protein                          | 1.11 | 0.55 |
| 1778 | Cobalt-zinc-cadmium resistance protein                      | 1.08 | 0.18 |
| 1779 | Hypothetical protein                                        | 1.18 | 0.31 |
| 1780 | Hypothetical protein                                        | 1.83 | 0.55 |
| 1782 | Sodium/glutamate symport carrier protein                    | 1.67 | 1.21 |
| 1788 | HTH DNA-binding protein                                     | 0.64 | 0.1  |
| 1789 | Hypothetical protein                                        | 2.16 | 0.88 |
| 1790 | Conserved protein                                           | 2.39 | 0.17 |
| 1791 | Conserved protein                                           | 1.73 | 0.37 |
| 1792 | Hypothetical protein                                        | 1.16 | 0.16 |
| 1793 | Hypothetical protein                                        | 3.08 | 1.16 |
| 1794 | Hypothetical protein                                        | 1.63 | 0.99 |
| 1795 | Iron-sulfur cluster-binding protein                         | 1.06 | 0.15 |
| 1796 | Conserved protein                                           | 1.31 | 0.72 |
| 1797 | 10 kDa chaperonin                                           | 1.78 | 0.37 |
| 1798 | GroEL protein                                               | 1.32 | 0.79 |
| 1802 | Aspartate aminotransferase                                  | 0.54 | 0.36 |
| 1803 | Hypothetical protein                                        | 4.48 | 1.19 |
| 1804 | Rubryerythrin                                               | 0.65 | 0.34 |
| 1805 | Conserved protein                                           | 0.47 | 0.29 |
| 1806 | DNA primase                                                 | 0.51 | 0.2  |
| 1807 | Protein translation initiation factor 2 subunit alpha IF-2a | 0.37 | 0.14 |

|      |                                                                    |      |      |
|------|--------------------------------------------------------------------|------|------|
| 1808 | SSU ribosomal protein S27E                                         | 0.31 | 0.27 |
| 1809 | LSU ribosomal protein L44E                                         | 0.33 | 0.27 |
| 1810 | Conserved protein                                                  | 0.81 | 0.31 |
| 1811 | DNA primase small subunit                                          | 1.81 | 0.88 |
| 1813 | Conserved protein                                                  | 0.53 | 0    |
| 1814 | Hypothetical protein                                               | 1.06 | 0.05 |
| 1816 | Conserved protein                                                  | 1.34 | 1.43 |
| 1818 | Conserved protein                                                  | 1.09 | 0.77 |
| 1821 | Replication factor c subunit                                       | 0.65 | 0.28 |
| 1823 | Putative small multi-drug export protein                           | 0.95 | 0.64 |
| 1824 | Ferredoxin                                                         | 0.61 | 0.48 |
| 1825 | DNA binding protein                                                | 0.86 | 0.38 |
| 1826 | Methyltransferase                                                  | 0.6  | 0.28 |
| 1827 | Pyruvate carboxylase (biotin-containing) subunit B                 | 0.49 | 0.13 |
| 1828 | Pyruvate carboxylase. subunit A                                    | 0.5  | 0.18 |
| 1829 | Biotin-[acetyl-CoA-carboxylase] synthetase/biotin operon repressor | 0.44 | 0.27 |
| 1830 | Conserved protein                                                  | 1.28 | 0.47 |
| 1833 | Phosphoserine phosphatase                                          | 0.7  | 0.44 |
| 1834 | Conserved protein                                                  | 1.01 | 0.41 |
| 1835 | Conserved protein                                                  | 1.17 | 0.12 |
| 1836 | Cell division control protein (MCM family)                         | 0.66 | 0.6  |
| 1837 | RNA methylase                                                      | 0.69 | 0.36 |
| 1838 | Ferredoxin                                                         | 0.47 | 0.02 |
| 1842 | Sulfite reductase. assimilatory-type                               | 5.99 | 6.94 |
| 1843 | Heterodisulfide reductase. subunit HdrE                            | 0.45 | 0.35 |
| 1844 | Heterodisulfide reductase. subunit HdrD                            | 0.64 | 0.51 |

|      |                                                              |      |      |
|------|--------------------------------------------------------------|------|------|
| 1845 | Conserved protein                                            | 0.83 | 0.79 |
| 1846 | Conserved protein                                            | 0.99 | 0.45 |
| 1847 | Hypothetical protein                                         | 0.71 | 0.02 |
| 1849 | Geranylgeranyl reductase                                     | 1.6  | 0.82 |
| 1850 | RNase P                                                      | 5.25 | 7.42 |
| 1851 | Hypothetical protein                                         | 0.66 | 0.48 |
| 1852 | Conserved protein                                            | 1.08 | 0.46 |
| 1853 | Conserved protein                                            | 0.7  | 0.54 |
| 1854 | Archaeal flavoprotein                                        | 1.04 | 0.12 |
| 1855 | Dipeptide/oligopeptide ABC transporter. ATP-binding protein  | 3.27 | 2.51 |
| 1856 | Dipeptide/ oligopeptide ABC transporter. ATP-binding protein | 4.16 | 2.3  |
| 1858 | Dipeptide/ oligopeptide ABC transporter. permease            | 5.2  | 3.04 |
| 1859 | Dipeptide/ oligopeptide binding protein                      | 3.79 | 0.45 |
| 1861 | Conserved protein                                            | 0.11 | 0.05 |
| 1862 | Transporter                                                  | 0.57 | 0.29 |
| 1863 | Transcriptional regulator. MarR family                       | 0.46 | 0.14 |
| 1864 | Conserved protein                                            | 1.73 | 1.19 |
| 1865 | Conserved protein                                            | 1.85 | 0.58 |
| 1869 | Conserved protein                                            | 0.62 | 0.42 |
| 1870 | Conserved protein                                            | 1.18 | 0.18 |
| 1871 | Vanillate decarboxylase protein                              | 1.95 | 0.06 |
| 1872 | Conserved protein                                            | 1.86 | 0.73 |
| 1873 | Phosphohydrolase                                             | 1.55 | 0.4  |
| 1874 | Methyltransferase                                            | 0.68 | 0.11 |
| 1875 | Conserved protein                                            | 0.69 | 0.74 |

|      |                                                       |       |       |
|------|-------------------------------------------------------|-------|-------|
| 1876 | Purine phosphoribosyltransferase                      | 0.53  | 0.23  |
| 1877 | Diphthamide synthase subunit                          | 0.68  | 0.17  |
| 1878 | Methyltransferase                                     | 0.54  | 0.12  |
| 1879 | putative RNA-binding protein                          | 0.66  | 0.28  |
| 1880 | DNA-directed RNA polymerase subunit L                 | 0.46  | 0.17  |
| 1881 | Conserved protein                                     | 0.63  | 0.02  |
| 1883 | Conserved protein                                     | 0.5   | 0.28  |
| 1885 | Diaminopimelate decarboxylase                         | 0.51  | 0.3   |
| 1890 | Conserved protein                                     | 7.36  | 9.54  |
| 1896 | Phenylacetic acid degradation protein                 | 0.64  | 0.22  |
| 1897 | Hypothetical protein                                  | 0.46  | 0.25  |
| 1899 | Hypothetical protein                                  | 0.48  | 0.22  |
| 1902 | Hypothetical protein                                  | 1.19  | 0.41  |
| 1903 | Transcriptional regulator. MarR family                | 11.03 | 14.37 |
| 1904 | Hypothetical membrane spanning protein                | 0.74  | 0.14  |
| 1908 | Hypothetical protein                                  | 0.88  | 0.35  |
| 1909 | Glutathione-regulated potassium-efflux system protein | 0.15  | 0.05  |
| 1911 | Cysteinyl-tRNA synthetase                             | 1.39  | 0.38  |
| 1913 | ATP-dependent protease La                             | 2.89  | 2.16  |
| 1914 | Hypothetical protein                                  | 0.93  | 0.22  |
| 1915 | Hypothetical sensory transduction histidine kinase    | 2.97  | 0.87  |
| 1916 | Lysyl-tRNA synthetase. class II                       | 0.41  | 0.09  |
| 1917 | ATP-dependent RNA helicase                            | 2.54  | 1.33  |
| 1921 | Hypothetical protein                                  | 2.07  | 0.44  |
| 1922 | Hypothetical protein                                  | 1.59  | 0.29  |
| 1923 | Hypothetical protein                                  | 1.24  | 0.16  |
| 1924 | Hypothetical protein                                  | 4.04  | 4.18  |

|      |                                                       |       |       |
|------|-------------------------------------------------------|-------|-------|
| 1925 | hypothetical protein                                  | 1.4   | 0.38  |
| 1928 | Phosphinothricin acetyltransferase                    | 1.45  | 0.22  |
| 1929 | Hypothetical protein                                  | 1.12  | 0.89  |
| 1931 | Sensory Transduction protein Kinase                   | 3.43  | 0.33  |
| 1932 | Methylcobalamin:coenzyme M methyltransferase<br>MtbA3 | 1.13  | 0.35  |
| 1933 | Integral membrane protein                             | 0.56  | 0.31  |
| 1934 | Hypothetical protein                                  | 0.92  | 0.29  |
| 1935 | Acetyltransferase                                     | 1.57  | 0.77  |
| 1936 | Conserved protein                                     | 1.03  | 0.39  |
| 1937 | Hypothetical protein                                  | 0.67  | 0.17  |
| 1938 | Hypothetical protein                                  | 0.2   | 0.12  |
| 1939 | Glutamine-binding protein                             | 0.88  | 0.21  |
| 1940 | Glutamine transporter. permease protein               | 0.91  | 0.63  |
| 1941 | Glutamine transporter. ATP-binding protein            | 1.11  | 0.42  |
| 1943 | Conserved protein                                     | 1.81  | 0.18  |
| 1948 | Oxidoreductase. aldo/keto family                      | 0.7   | 0.14  |
| 1949 | Methyltransferase                                     | 1.12  | 0.11  |
| 1951 | Hypothetical protein                                  | 23.82 | 29.47 |
| 1952 | Cobalt-zinc-cadmium resistance protein                | 2.3   | 1.45  |
| 1954 | NifU protein                                          | 1.72  | 1.47  |
| 1955 | Cysteine desulfurase NifS                             | 1.92  | 1.14  |
| 1956 | Hypothetical protein                                  | 2.18  | 0.92  |
| 1957 | Hypothetical transcriptional regulatory protein       | 1.53  | 0.52  |
| 1958 | Hit-like protein. involved in cell-cycle regulation   | 1.28  | 0.34  |
| 1961 | Hypothetical protein                                  | 1.09  | 0.35  |
| 1962 | Conserved protein                                     | 1.18  | 0.03  |

|      |                                                     |      |      |
|------|-----------------------------------------------------|------|------|
| 1963 | Tyrosyl-tRNA synthetase                             | 0.46 | 0.13 |
| 1964 | hypothetical protein                                | 0.56 | 0.33 |
| 1965 | Hypothetical protein                                | 0.84 | 0.35 |
| 1966 | Malate dehydrogenase                                | 0.29 | 0.07 |
| 1967 | Hypothetical protein                                | 0.54 | 0.01 |
| 1968 | Cupin-type phosphoglucose isomerases                | 0.77 | 0.67 |
| 1969 | Hypothetical protein                                | 0.98 | 0.17 |
| 1970 | Single-stranded-DNA-specific exonuclease RecJ       | 0.82 | 0.06 |
| 1971 | Conserved protein                                   | 0.74 | 0.05 |
| 1973 | Conserved protein                                   | 3.27 | 4.49 |
| 1974 | Histone acetyltransferase (ELP3 family)             | 0.66 | 0.23 |
| 1975 | Conserved protein                                   | 0.89 | 0.49 |
| 1976 | Conserved protein                                   | 0.28 | 0.1  |
| 1977 | Conserved protein                                   | 1.07 | 0.35 |
| 1978 | Tungsten formylmethanofuran dehydrogenase subunit C | 0.76 | 0.42 |
| 1979 | Tungsten formylmethanofuran dehydrogenase subunit A | 1.33 | 0.84 |
| 1980 | Tungsten formylmethanofuran dehydrogenase subunit B | 1.85 | 0.78 |
| 1981 | Tungsten formylmethanofuran dehydrogenase subunit D | 1.15 | 0.37 |
| 1984 | Hypothetical protein                                | 0.75 | 0.11 |
| 1985 | Hypothetical protein                                | 1.49 | 1    |
| 1986 | Regulatory protein (putative)                       | 0.67 | 0.39 |
| 1989 | Hypothetical protein                                | 1.15 | 0.4  |
| 1990 | Hypothetical protein                                | 1.39 | 0.12 |
| 1992 | Hypothetical protein                                | 2.68 | 1.52 |
| 1993 | ABC transporter. ATP-binding protein                | 3.12 | 0.14 |
| 1994 | Cobalt transport ATP-binding protein CbiO           | 2.42 | 0.06 |
| 1995 | Cobalt ABC transporter. permease protein CbiQ       | 5.9  | 3.46 |

|      |                                            |       |       |
|------|--------------------------------------------|-------|-------|
| 1996 | Cobalt transport ATP-binding protein CbiO  | 6.34  | 4.9   |
| 1997 | Cobalt transport permease CbiM analog      | 6.46  | 1.45  |
| 1998 | Cobalamin biosynthesis protein CobN        | 13.17 | 14.46 |
| 1999 | Hypothetical protein                       | 7.83  | 5.37  |
| 2000 | Hypothetical protein                       | 12.52 | 9.58  |
| 2001 | Hypothetical protein                       | 29.25 | 10.97 |
| 2002 | Conserved protein                          | 6.88  | 5.03  |
| 2003 | Magnesium-chelatase subunit                | 6.1   | 7.53  |
| 2005 | Phosphate-binding protein                  | 0.34  | 0.01  |
| 2007 | Phosphate transporter. permease protein    | 0.49  | 0.03  |
| 2008 | Phosphate transporter. permease protein    | 0.43  | 0.03  |
| 2009 | Phosphate transporter. ATP-binding protein | 0.41  | 0.03  |
| 2010 | Phosphate transport system protein         | 0.98  | 0.28  |
| 2011 | Dihydroorotase                             | 1.27  | 1.14  |
| 2012 | Putative RNA-binding protein               | 0.4   | 0.31  |
| 2013 | Serine/threonine protein kinase            | 0.57  | 0.57  |
| 2014 | Translation initiation factor 1A (EIF-1A)  | 0.64  | 0.47  |
| 2015 | Hypothetical protein                       | 0.8   | 0.09  |
| 2016 | HesB protein                               | 0.34  | 0.23  |
| 2017 | Conserved protein                          | 0.48  | 0.17  |
| 2018 | Conserved protein                          | 2.67  | 0.8   |
| 2019 | Phosphoribosyl-AMP cyclohydrolase          | 0.47  | 0.06  |
| 2020 | TWITCHING MOBILITY (PilT) related protein  | 0.48  | 0.15  |
| 2021 | Conserved protein                          | 12.07 | 15.59 |
| 2022 | TRANSPORTER. LysE family                   | 1.12  | 0.92  |
| 2026 | Hypothetical protein                       | 2.78  | 0.87  |
| 2027 | Hypothetical protein                       | 0.84  | 0.39  |

|      |                                                                     |      |      |
|------|---------------------------------------------------------------------|------|------|
| 2028 | Hypothetical protein                                                | 2.57 | 0.47 |
| 2029 | Conserved protein                                                   | 1.93 | 0.52 |
| 2030 | Amidotransferase hisH                                               | 0.62 | 0.1  |
| 2031 | Hydrogenase expression/formation protein                            | 1.41 | 1.11 |
| 2032 | Nodulation protein                                                  | 1.51 | 0    |
| 2033 | Stomatin-like protein                                               | 0.86 | 0.46 |
| 2034 | Conserved protein                                                   | 0.56 | 0.34 |
| 2035 | Orotate phosphoribosyltransferase                                   | 0.74 | 0.34 |
| 2036 | Conserved protein                                                   | 0.43 | 0.16 |
| 2037 | Conserved protein                                                   | 0.8  | 0.06 |
| 2038 | Conserved protein                                                   | 1.26 | 0.54 |
| 2039 | SSU ribosomal protein S8E                                           | 0.24 | 0.14 |
| 2040 | TRANSCRIPTIONAL REGULATORY PROTEIN.<br>ASNC FAMILY                  | 0.37 | 0.18 |
| 2041 | Aspartate aminotransferase                                          | 0.84 | 0.01 |
| 2042 | Archaeal transcriptional regulator                                  | 0.88 | 0.24 |
| 2043 | Hypothetical protein                                                | 0.4  | 0.19 |
| 2045 | Conserved protein                                                   | 1.1  | 0.13 |
| 2046 | Trimethylamine Permease MttP2                                       | 2.26 | 1.49 |
| 2047 | Trimethylamine corrionid protein MttC2                              | 2.72 | 2.3  |
| 2049 | Trimethylamine:corrionid methyltransferase MttB2                    | 3.86 | 1.86 |
| 2050 | Dimethylamine:corrionid methyltransferase MtbB2 (C-terminal domain) | 1.6  | 0.21 |
| 2051 | Dimethylamine:corrionid methyltransferase MtbB2                     | 1.83 | 1.03 |
| 2052 | Dimethylamine corrionid protein MtbC2                               | 2.84 | 2.19 |
| 2053 | Conserved protein                                                   | 0.65 | 0.13 |
| 2054 | ABC transporter. ATP-binding protein                                | 0.64 | 0.26 |



|      |                                                                    |      |      |
|------|--------------------------------------------------------------------|------|------|
| 2055 | ABC transporter. ATP-binding protein                               | 0.88 | 0.05 |
| 2056 | AdoCbi-P nucleotidyltransferase CobY                               | 1.28 | 0.19 |
| 2057 | Cobalamin [5'-phosphate] synthase CobS                             | 1.26 | 0.2  |
| 2058 | Hypothetical protein                                               | 1.73 | 1.16 |
| 2059 | Cobalamin biosynthesis protein CbiB                                | 1.02 | 1    |
| 2060 | Histidinol-phosphate aminotransferase                              | 0.54 | 0.58 |
| 2061 | Histidyl-tRNA synthetase                                           | 0.34 | 0.07 |
| 2066 | SSU ribosomal protein S15P                                         | 0.43 | 0.14 |
| 2067 | Ferric enterobactin ABC transporter. ATP-binding protein (FepC)    | 1.4  | 1.03 |
| 2068 | Ferric enterobactin ABC transporter. permease protein (FepG)       | 0.94 | 0.87 |
| 2069 | Ferric enterobactin ABC transporter. solute binding protein (FepB) | 2.23 | 1.33 |
| 2070 | Nicotinate-nucleotide pyrophosphorylase                            | 0.8  | 0.18 |
| 2071 | Conserved protein                                                  | 1.17 | 0.04 |
| 2072 | Putative dinucleotide-utilizing enzyme                             | 0.42 | 0.26 |
| 2073 | Quinolinate synthetase A                                           | 0.35 | 0.12 |
| 2074 | Conserved protein                                                  | 0.7  | 0.38 |
| 2076 | S-adenosylmethionine synthetase                                    | 1.4  | 0.68 |
| 2077 | Conserved protein                                                  | 1.7  | 0.75 |
| 2078 | Conserved protein                                                  | 6.43 | 3.35 |
| 2079 | Thioredoxin                                                        | 3.17 | 1.52 |
| 2083 | Orotidine 5'-phosphate decarboxylase                               | 0.47 | 0.18 |
| 2084 | CO dehydrogenase/acetyl-CoA synthase. gamma subunit                | 2.87 | 2.01 |
| 2087 | CO dehydrogenase/acetyl-CoA synthase. beta subunit                 | 5.34 | 3.74 |
| 2088 |                                                                    | 1.18 | 0.66 |
| 2089 | CO dehydrogenase/acetyl-CoA synthase. alpha subunit                | 2.15 | 1.52 |

|      |                                                               |       |       |
|------|---------------------------------------------------------------|-------|-------|
| 2090 | HTH DNA-binding protein                                       | 1.15  | 0.32  |
| 2091 | Probable transport channel protein                            | 1.24  | 0.32  |
| 2092 | CODH nickel-insertion accessory protein (iron-sulfur protein) | 2.18  | 0.86  |
| 2093 | Indolepyruvate oxidoreductase. subunit                        | 0.61  | 0.06  |
| 2095 | Hypothetical protein                                          | 0.85  | 0.75  |
| 2096 | UDP-N-acetylglucosamine-1-phosphate transferase               | 1.1   | 0.57  |
| 2098 | Conserved protein                                             | 0.9   | 0.3   |
| 2102 | Glycosyl transferase                                          | 0.98  | 0.52  |
| 2103 | Putative Methyltransferase                                    | 0.98  | 0.08  |
| 2105 | Putative glycosyltransferase                                  | 1.13  | 0.1   |
| 2108 | Conserved protein                                             | 0.9   | 0.42  |
| 2109 | Glycosyl transferase                                          | 0.95  | 0.14  |
| 2111 | Galactoside O-acetyltransferase                               | 1.17  | 0.47  |
| 2112 | Hypothetical protein                                          | 3.24  | 3.14  |
| 2113 | Hypothetical protein                                          | 0.75  | 0.15  |
| 2115 | Protease HTPX homolog                                         | 0.84  | 0.51  |
| 2117 | Hypothetical protein                                          | 2.26  | 0.48  |
| 2118 | Hypothetical protein                                          | 1.42  | 1.24  |
| 2119 | Hypothetical protein                                          | 64.89 | 47.55 |
| 2122 | Putative serine/threonine protein kinase                      | 0.86  | 0.54  |
| 2124 | LSU ribosomal protein L3P                                     | 0.33  | 0.21  |
| 2125 | LSU ribosomal protein L4                                      | 0.26  | 0.16  |
| 2126 | LSU ribosomal protein L23P                                    | 0.29  | 0.23  |
| 2127 | LSU ribosomal protein L2P                                     | 0.3   | 0.23  |
| 2128 | SSU ribosomal protein S19P                                    | 0.32  | 0.19  |
| 2129 | LSU ribosomal protein L22P                                    | 0.29  | 0.25  |

|      |                                        |      |      |
|------|----------------------------------------|------|------|
| 2130 | SSU ribosomal protein S3P              | 0.29 | 0.2  |
| 2131 | LSU ribosomal protein L29P             | 0.29 | 0.19 |
| 2132 | RNaseP subunitP29                      | 0.31 | 0.19 |
| 2133 | SSU ribosomal protein S17P             | 0.22 | 0.14 |
| 2134 | LSU ribosomal protein L14P             | 0.26 | 0.2  |
| 2135 | LSU ribosomal protein L24P             | 0.24 | 0.12 |
| 2136 | SSU ribosomal protein S4E              | 0.39 | 0.19 |
| 2137 | LSU ribosomal protein L5P              | 0.25 | 0.2  |
| 2138 | SSU ribosomal protein S14P             | 0.22 | 0.18 |
| 2139 | SSU ribosomal protein S8P              | 0.2  | 0.14 |
| 2140 | LSU ribosomal protein L6P              | 0.18 | 0.13 |
| 2141 | LSU ribosomal protein L32E             | 0.2  | 0.14 |
| 2142 | LSU ribosomal protein L19E             | 0.21 | 0.13 |
| 2143 | LSU ribosomal protein L18P             | 0.28 | 0.19 |
| 2144 | SSU ribosomal protein S5P              | 0.33 | 0.21 |
| 2145 | LSU ribosomal protein L30P             | 0.48 | 0.18 |
| 2146 | LSU ribosomal protein L15P             | 0.28 | 0.2  |
| 2147 | Protein translocase. subunit SecY      | 0.44 | 0.27 |
| 2148 | Adenylate kinase                       | 0.56 | 0.32 |
| 2150 | Conserved protein                      | 0.95 | 0.36 |
| 2152 | Hypothetical protein                   | 0.58 | 0    |
| 2153 | Cytidylate kinase                      | 0.43 | 0.3  |
| 2154 | tRNA pseudouridine synthase            | 0.39 | 0.19 |
| 2155 | SSU ribosomal protein S13P             | 0.35 | 0.34 |
| 2156 | SSU ribosomal protein S4P              | 0.35 | 0.3  |
| 2157 | SSU ribosomal protein S11P             | 0.38 | 0.34 |
| 2158 | DNA-directed RNA polymerase. subunit D | 0.55 | 0.24 |

|      |                                                              |      |      |
|------|--------------------------------------------------------------|------|------|
| 2159 | Hypothetical protein                                         | 0.83 | 0.08 |
| 2161 | Hypothetical protein                                         | 0.95 | 0.39 |
| 2163 | Hydrogenase expression/formation protein                     | 0.61 | 0.27 |
| 2164 | Hydrogenase expression/formation protein                     | 0.4  | 0.05 |
| 2169 | F420-nonreducing hydrogenase II. small subunit (VhtG)        | 0.31 | 0.13 |
| 2170 | F420-nonreducing hydrogenase II. large subunit (VhtA)        | 1.07 | 0.3  |
| 2171 | F420-nonreducing hydrogenase II. cytochrome b subunit (VhtC) | 1.54 | 0.89 |
| 2172 | Hydrogenase expression/formation protein                     | 1.47 | 0.93 |
| 2173 | Conserved protein                                            | 2.01 | 0.61 |
| 2174 | Conserved protein                                            | 1.94 | 1.01 |
| 2178 | Two component system histidine kinase                        | 2.81 | 0.92 |
| 2179 | Conserved protein                                            | 0.31 | 0.08 |
| 2180 | GMP synthase [glutamine-hydrolyzing]                         | 0.3  | 0.09 |
| 2181 | Fructose-1.6-bisphosphatase                                  | 0.53 | 0.09 |
| 2182 | Hypothetical protein                                         | 0.7  | 0.88 |
| 2184 | TATA-box binding protein                                     | 1.02 | 0.21 |
| 2185 | Hypothetical protein                                         | 1.77 | 0.81 |
| 2189 | Rubryerythrin                                                | 1.04 | 0.4  |
| 2193 | DNA repair protein (MRE11/RAD32 family)                      | 0.94 | 0.23 |
| 2194 | DNA repair protein RAD50                                     | 0.98 | 0.16 |
| 2196 | Conserved protein                                            | 0.98 | 0.25 |
| 2198 | Type I restriction-modification system methylation subunit   | 1.18 | 0.16 |
| 2199 | Type I restriction-modification system specificity subunit   | 1.33 | 0.11 |
| 2202 | Hypothetical protein                                         | 1.13 | 0    |
| 2203 | Hypothetical protein                                         | 1.11 | 0.21 |

|      |                                                     |      |      |
|------|-----------------------------------------------------|------|------|
| 2204 | Hypothetical protein                                | 1.44 | 0.14 |
| 2205 | Ribose-phosphate pyrophosphokinase                  | 0.56 | 0.12 |
| 2206 | Molybdenum cofactor biosynthesis protein C          | 0.82 | 0.06 |
| 2208 | Putative sugar kinase                               | 1.91 | 0.96 |
| 2209 | Conserved protein                                   | 1.86 | 0.79 |
| 2210 | Oligosaccharyl transferase                          | 0.43 | 0.3  |
| 2211 | Hypothetical protein                                | 2.19 | 0.36 |
| 2212 | Conserved protein                                   | 0.87 | 0.38 |
| 2213 | Putative glycosyltransferase                        | 1.04 | 0.43 |
| 2214 | Polysaccharide ABC transporter. ATP-binding protein | 0.78 | 0.56 |
| 2215 | Polysaccharide ABC transporter. permease protein    | 0.64 | 0.39 |
| 2217 | Conserved protein                                   | 1.39 | 0.09 |
| 2221 | Glycosyltransferase                                 | 1.1  | 0.06 |
| 2222 | Galactoside O-acetyltransferase                     | 0.69 | 0.02 |
| 2223 | Dolichyl-phosphate glucose synthetase               | 0.82 | 0.26 |
| 2224 | Trp repressor binding protein                       | 1.94 | 0.55 |
| 2225 | Glucoamylase                                        | 1.43 | 0.09 |
| 2226 | Glucoamylase                                        | 1.3  | 0.1  |
| 2227 | Acetyltransferase                                   | 1.61 | 0.7  |
| 2228 | Amidohydrolase (putative)                           | 1.76 | 0.56 |
| 2233 | Conserved protein                                   | 2.19 | 1.35 |
| 2234 | Conserved protein                                   | 3.67 | 1.74 |
| 2235 | Conserved protein                                   | 9.07 | 8.21 |
| 2236 | Conserved protein                                   | 2.25 | 0.56 |
| 2237 | Transcriptional regulator. ArsR family              | 1.07 | 0.44 |
| 2242 | Transcriptional regulator. ArsR family              | 1.85 | 0.85 |
| 2243 | Putative methyltransferase                          | 1.69 | 0.54 |

|      |                                                        |      |      |
|------|--------------------------------------------------------|------|------|
| 2246 | Transcriptional regulator. ArsR family                 | 1.4  | 0.05 |
| 2250 | Conserved protein                                      | 1.14 | 0.03 |
| 2251 | Tetrahydromethanopterin S-methyltransferase. subunit A | 0.81 | 0.04 |
| 2252 | Conserved protein                                      | 0.44 | 0.21 |
| 2256 | Conserved protein                                      | 1.05 | 0    |
| 2257 | Conserved protein                                      | 1.45 | 0.08 |
| 2258 | Conserved protein                                      | 0.9  | 0.32 |
| 2260 | Hypothetical protein                                   | 1    | 0.44 |
| 2261 | Conserved protein                                      | 1.3  | 0.16 |
| 2262 | Conserved protein                                      | 2.1  | 0.88 |
| 2263 | SSU ribosomal protein S10P                             | 0.43 | 0.46 |
| 2264 | Protein translation elongation factor 1A (EF-1A)       | 0.33 | 0.28 |
| 2265 | Protein translation elongation factor 2                | 0.38 | 0.33 |
| 2266 | SSU ribosomal protein S7P                              | 0.28 | 0.21 |
| 2267 | SSU ribosomal protein S12P                             | 0.25 | 0.19 |
| 2268 | NusA protein homolog                                   | 0.36 | 0.22 |
| 2269 | LSU ribosomal protein L30E                             | 0.29 | 0.25 |
| 2270 | DNA-directed RNA polymerase. subunit A''               | 0.82 | 0.3  |
| 2271 | DNA-directed RNA polymerase. subunit A'                | 0.72 | 0.4  |
| 2272 | DNA-directed RNA polymerase. subunit B''               | 0.75 | 0.33 |
| 2273 | DNA-directed RNA polymerase. subunit B'                | 0.45 | 0.19 |
| 2274 | DNA-directed RNA polymerase. subunit H                 | 0.54 | 0.07 |
| 2275 | Hypothetical sensory transduction histidine kinase     | 4.15 | 0.98 |
| 2276 | Hypothetical sensory transduction histidine kinase     | 1.7  | 0.4  |
| 2278 | Adenosylhomocysteinase                                 | 0.91 | 0.17 |
| 2279 | Chlorohydrolase family protein                         | 1.07 | 0.1  |
| 2280 | Conserved protein                                      | 0.65 | 0.02 |

|      |                                                             |      |      |
|------|-------------------------------------------------------------|------|------|
| 2281 | Hypothetical protein                                        | 0.4  | 0.25 |
| 2282 | Conserved protein                                           | 0.36 | 0.07 |
| 2283 | DNA/pantothenate metabolism flavoprotein                    | 0.57 | 0.11 |
| 2285 | Conserved protein                                           | 0.4  | 0.11 |
| 2286 | Conserved protein                                           | 1.02 | 0.69 |
| 2287 | Hypothetical protein                                        | 0.43 | 0.21 |
| 2288 | Methyltransferase involved in cell division                 | 0.46 | 0.16 |
| 2289 | Hypothetical protein                                        | 0.54 | 0.05 |
| 2290 | Cell surface protein                                        | 0.65 | 0.02 |
| 2292 | Type I restriction-modification system restriction subunit  | 0.92 | 0    |
| 2293 | Type I restriction-modification system specificity subunit  | 1.18 | 0.38 |
| 2294 | Type I restriction-modification system methylation subunit  | 0.79 | 0.07 |
| 2295 | Surface layer protein (putative)                            | 1.46 | 0.42 |
| 2297 | Conserved protein                                           | 1.45 | 0.31 |
| 2300 | Metal-dependent hydrolase                                   | 0.4  | 0.09 |
| 2301 | Carbon monoxide dehydrogenase                               | 2.51 | 1.86 |
| 2302 | Conserved protein                                           | 0.34 | 0.07 |
| 2303 | Transcriptional regulator                                   | 0.29 | 0.05 |
| 2305 | Sodium/proline symporter                                    | 1.36 | 1.28 |
| 2306 | L-asparaginase                                              | 1.14 | 0.36 |
| 2307 | Argininosuccinate lyase                                     | 0.5  | 0.16 |
| 2309 | Hypothetical protein                                        | 1.89 | 0.82 |
| 2310 | Ubiquinone biosynthesis protein                             | 3.51 | 2.09 |
| 2312 | F420-nonreducing hydrogenase I. cytochrome b subunit (VhoC) | 0.41 | 0.09 |
| 2314 | F420-nonreducing hydrogenase I. small subunit (VhoG)        | 1.79 | 1.04 |

|      |                                              |      |      |
|------|----------------------------------------------|------|------|
| 2315 | Hydrogenase expression/formation protein     | 2.01 | 0.53 |
| 2316 | Hydrogenase expression/formation protein     | 1.01 | 0.61 |
| 2317 | Hydrogenase expression/formation protein     | 1.05 | 0.53 |
| 2319 | Hydrogenase expression/formation protein     | 1.54 | 0.02 |
| 2320 | Ech Hydrogenase. Subunit A                   | 0.54 | 0.38 |
| 2321 | Ech Hydrogenase. Subunit B                   | 0.51 | 0.42 |
| 2322 | Ech Hydrogenase. Subunit C                   | 0.64 | 0.59 |
| 2323 | Ech Hydrogenase. Subunit D                   | 0.78 | 0.43 |
| 2324 | Ech Hydrogenase. Subunit E                   | 0.92 | 0.56 |
| 2325 | Ech Hydrogenase. Subunit F                   | 0.71 | 0.35 |
| 2326 | COP associated protein                       | 2.17 | 1.02 |
| 2327 | COP associated protein                       | 1.42 | 0.72 |
| 2328 | Copper-exporting ATPase                      | 2.58 | 1.85 |
| 2329 | Conserved protein                            | 1.2  | 0.13 |
| 2330 | Hypothetical protein                         | 0.72 | 0.11 |
| 2331 | Uncharacterized permease                     | 2.34 | 1.34 |
| 2333 | Multidrug efflux pump                        | 1.97 | 0.92 |
| 2334 | Conserved protein                            | 1.28 | 0.47 |
| 2335 | Conserved protein                            | 0.66 | 0.16 |
| 2336 | Translation initiation factor 1A (EIF-1A)    | 1.21 | 0.17 |
| 2337 | Conserved protein                            | 1.76 | 0.8  |
| 2338 | Conserved protein in Methanosarcina spec.    | 0.44 | 0.68 |
| 2340 | Acetolactate synthase                        | 1.33 | 0.09 |
| 2341 | Succinate-semialdehyde dehydrogenase [NADP+] | 1.3  | 0.35 |
| 2343 | Copper-binding protein                       | 1.33 | 0.2  |
| 2346 | Methyltransferase                            | 1.55 | 1.52 |
| 2348 | O-linked N-acetylglucosamine transferase     | 0.83 | 0.14 |



|      |                                                             |      |      |
|------|-------------------------------------------------------------|------|------|
| 2350 | O-linked N-acetylglucosamine transferase                    | 4.43 | 2.7  |
| 2351 | Transcriptional regulator                                   | 2.43 | 0.33 |
| 2353 | Thioredoxin reductase                                       | 1.98 | 0.75 |
| 2354 | Thioredoxin                                                 | 1.43 | 0.97 |
| 2355 | Diphthine synthase                                          | 0.49 | 0.18 |
| 2357 | Hypothetical protein                                        | 0.4  | 0.09 |
| 2358 | 6-Phosphofructokinase (ADP)                                 | 0.48 | 0.08 |
| 2359 | Conserved protein                                           | 0.5  | 0.04 |
| 2360 | Phosphoribosylaminoimidazole carboxylase. catalytic subunit | 0.7  | 0.14 |
| 2362 | Shikimate kinase                                            | 1.06 | 0.28 |
| 2363 | Conserved protein                                           | 0.54 | 0.09 |
| 2364 | GTP-binding protein                                         | 0.59 | 0.29 |
| 2365 | Conserved protein                                           | 0.68 | 0.32 |
| 2366 | Conserved protein                                           | 0.62 | 0.38 |
| 2367 | Hexulose-6-phosphate isomerase                              | 0.35 | 0.32 |
| 2368 | Aspartate aminotransferase                                  | 0.55 | 0.05 |
| 2369 | Cytochrome c-type biogenesis protein                        | 1.32 | 0.77 |
| 2370 | GTP-binding protein                                         | 0.45 | 0.05 |
| 2371 | Conserved protein                                           | 0.55 | 0.16 |
| 2373 | 3-Isopropylmalate dehydratase                               | 0.5  | 0.14 |
| 2375 | Conserved protein                                           | 0.91 | 0.05 |
| 2376 | Conserved protein                                           | 1.62 | 0.04 |
| 2378 | Conserved transmembrane protein                             | 0.84 | 0.27 |
| 2379 | 5'-Methylthioadenosine phosphorylase                        | 0.83 | 0.05 |
| 2380 | ATP-dependent DNA helicase                                  | 0.61 | 0.23 |
| 2381 | Conserved protein                                           | 1.44 | 0.36 |

|      |                                               |      |      |
|------|-----------------------------------------------|------|------|
| 2382 | Hypothetical protein                          | 0.44 | 0.36 |
| 2383 | Small nuclear riboprotein (snRNA) homolog     | 0.42 | 0.33 |
| 2384 | Conserved protein                             | 0.66 | 0.4  |
| 2385 | Conserved protein                             | 2.46 | 1.19 |
| 2386 | Hypothetical protein                          | 0.19 | 0.21 |
| 2387 | Cobalt transport ATP-binding protein CbiO     | 0.16 | 0.12 |
| 2388 | Cobalt ABC transporter. permease protein CbiQ | 0.16 | 0.17 |
| 2392 | Long-chain-fatty-acid--CoA ligase             | 0.35 | 0.18 |
| 2393 | Conserved protein                             | 0.49 | 0.22 |
| 2394 | Transcriptional regulator. MerR family        | 0.4  | 0.3  |
| 2395 | NADH:flavin oxidoreductases                   | 3.56 | 2.83 |
| 2397 | Heme exporter. protein B                      | 4.29 | 5.11 |
| 2398 | ABC transporter. ATP-binding protein          | 1.53 | 0.33 |
| 2399 | Peptide methionine sulfoxide reductase        | 3.87 | 1.01 |
| 2400 | Hypothetical protein                          | 3.96 | 0.8  |
| 2401 | Conserved protein                             | 4.33 | 3.16 |
| 2402 | Hypothetical protein                          | 2.69 | 1.54 |
| 2403 | Potassium channel protein                     | 0.88 | 0.2  |
| 2404 | Cation transporter                            | 0.74 | 0.19 |
| 2405 | Cation transporter                            | 0.77 | 0.37 |
| 2406 | Conserved protein                             | 1.11 | 0.28 |
| 2407 | Conserved protein                             | 1.45 | 0.54 |
| 2409 | Conserved protein                             | 1.54 | 0.22 |
| 2413 | Conserved protein                             | 0.97 | 0.14 |
| 2414 | Hypothetical protein                          | 0.64 | 0.12 |
| 2415 | Hypothetical protein                          | 1.1  | 0.01 |
| 2417 | Type II DNA topoisomerase VI. subunit B       | 0.72 | 0.32 |

|      |                                                         |      |      |
|------|---------------------------------------------------------|------|------|
| 2419 | DNA gyrase. subunit B                                   | 1.4  | 1.04 |
| 2420 | DNA gyrase. subunit A                                   | 1.92 | 0.49 |
| 2422 | Conserved protein                                       | 1.08 | 0.46 |
| 2423 | Superoxide dismutase                                    | 4.46 | 2.59 |
| 2424 | Conserved protein                                       | 1.14 | 0.18 |
| 2426 | Dienelactone hydrolase                                  | 1.56 | 0.65 |
| 2427 | Methylthiol:coenzyme M methyltransferase MtsA           | 2.42 | 0.96 |
| 2428 | Methylthiol:coenzyme M methyltransferase MtsB           | 4.19 | 3.06 |
| 2432 | Putative pyridoxine biosynthesis protein                | 0.49 | 0.15 |
| 2433 | Imidazoleglycerol-phosphate synthase                    | 0.48 | 0.02 |
| 2437 | Transposase                                             | 0.44 | 0.17 |
| 2443 | Conserved protein                                       | 1.42 | 0.33 |
| 2446 | Transcriptional regulator. ArsR family                  | 1.44 | 1.09 |
| 2448 | Transposase                                             | 1.01 | 0    |
| 2452 | Conserved protein                                       | 0.72 | 0.29 |
| 2454 | ABC transporter. permease protein                       | 2.8  | 0.83 |
| 2455 | ABC transporter. ATP-binding protein                    | 2.91 | 0.55 |
| 2456 | Dipeptide/oligopeptide transporter. ATP-binding protein | 1.56 | 1.64 |
| 2457 | Dipeptide/oligopeptide transporter. permease protein    | 1.89 | 1.67 |
| 2458 | Dipeptide/oligopeptide transporter. permease protein    | 1.48 | 1.56 |
| 2459 | Methyltransferase                                       | 1.14 | 1.09 |
| 2460 | Dipeptide/oligopeptide-binding protein                  | 1.24 | 1.26 |
| 2462 | SSU ribosomal protein S6E                               | 0.34 | 0.16 |
| 2463 | Protein translation initiation factor IF2               | 0.31 | 0.18 |
| 2464 | Nucleoside diphosphate kinase                           | 0.27 | 0.25 |
| 2465 | LSU ribosomal protein L24E                              | 0.29 | 0.25 |
| 2466 | SSU ribosomal protein S28E                              | 0.21 | 0.2  |

|      |                                                            |      |      |
|------|------------------------------------------------------------|------|------|
| 2467 | LSU ribosomal protein L7AE                                 | 0.22 | 0.22 |
| 2470 | Surface layer protein (putative)                           | 1.99 | 0.57 |
| 2471 | Hypothetical protein                                       | 0.91 | 0.28 |
| 2472 | Nucleotidyltransferase                                     | 1.18 | 0.23 |
| 2473 | Hypothetical protein                                       | 1.13 | 0.17 |
| 2478 | Chloride channel (putative)                                | 1.6  | 0.07 |
| 2479 | F420H2 dehydrogenase. subunitO                             | 0.4  | 0.49 |
| 2480 | F420H2 dehydrogenase. subunitN                             | 0.33 | 0.39 |
| 2481 | F420H2 dehydrogenase. subunitM                             | 0.39 | 0.41 |
| 2482 | F420H2 dehydrogenase. subunitL                             | 0.34 | 0.37 |
| 2483 | F420H2 dehydrogenase. subunitK                             | 0.25 | 0.32 |
| 2484 | F420H2 dehydrogenase. subunitJ2                            | 0.38 | 0.34 |
| 2485 | F420H2 dehydrogenase. subunitJ1                            | 0.33 | 0.34 |
| 2486 | F420H2 dehydrogenase. subunitI                             | 0.33 | 0.28 |
| 2487 | F420H2 dehydrogenase. subunitH                             | 0.24 | 0.26 |
| 2489 | F420H2 dehydrogenase. subunitC                             | 0.37 | 0.18 |
| 2490 | F420H2 dehydrogenase. subunitB                             | 0.21 | 0.23 |
| 2491 | F420H2 dehydrogenase. subunitA                             | 0.18 | 0.12 |
| 2492 | Putative Ferredoxin                                        | 0.51 | 0.4  |
| 2493 | Oxidoreductase (hypothetical)                              | 0.7  | 0.23 |
| 2494 | FO synthase. subunit CofG                                  | 0.83 | 0.38 |
| 2495 | F420 biosynthesis protein FbiC                             | 0.61 | 0.53 |
| 2496 | FO synthase. subunit CofH                                  | 0.47 | 0.22 |
| 2497 | 4-Methyl-5(B-hydroxyethyl)-thiazole monophosphate synthase | 0.73 | 0.5  |
| 2498 | Conserved protein                                          | 0.59 | 0.06 |
| 2499 | Geranylgeranyl reductase                                   | 0.58 | 0.12 |

|      |                                                                |      |      |
|------|----------------------------------------------------------------|------|------|
| 2500 | Trk system potassium uptake protein                            | 1.09 | 0.42 |
| 2501 | Trk system potassium uptake protein                            | 1.63 | 1.06 |
| 2502 | Trk system potassium uptake protein                            | 0.76 | 0.5  |
| 2503 | Trk system potassium uptake protein TrkA                       | 0.6  | 0.21 |
| 2504 | Chaperone protein DnaJ                                         | 1    | 0.82 |
| 2505 | Chaperone protein                                              | 0.91 | 0.51 |
| 2506 | GrpE protein                                                   | 0.63 | 0.67 |
| 2508 | Heat shock protein                                             | 0.59 | 0.38 |
| 2510 | Hypothetical protein                                           | 0.34 | 0.19 |
| 2511 | Hypothetical protein                                           | 0.52 | 0.18 |
| 2512 | 1-Pyrroline-5-carboxylate synthetase                           | 0.38 | 0.21 |
| 2513 | Hypothetical protein                                           | 0.33 | 0.08 |
| 2514 | Archaeal protein Translation Elongation Factor 1. subunit beta | 0.37 | 0.06 |
| 2516 | Probable transcriptional regulator                             | 1.48 | 0.19 |
| 2517 | Thiamine biosynthesis protein                                  | 0.63 | 0.04 |
| 2519 | GTP-binding protein homolog                                    | 0.56 | 0.34 |
| 2520 | Conserved protein                                              | 1.56 | 0.03 |
| 2522 | Universal stress protein                                       | 1.7  | 0.9  |
| 2523 | Hypothetical protein                                           | 1.83 | 0.04 |
| 2524 | Phage shock protein A                                          | 1.82 | 0.06 |
| 2525 | Hypothetical protein                                           | 0.68 | 0.38 |
| 2526 | Conserved protein                                              | 0.57 | 0.2  |
| 2527 | Hypothetical protein                                           | 0.73 | 0.48 |
| 2528 | N2.N2-dimethylguanosine tRNA methyltransferase                 | 0.6  | 0.03 |
| 2529 | Hypothetical protein                                           | 1.14 | 0.01 |
| 2531 | Hypothetical protein                                           | 2.34 | 0.29 |

|      |                                              |      |       |
|------|----------------------------------------------|------|-------|
| 2534 | Conserved hypothetical protein               | 0.54 | 0     |
| 2535 | Conserved hypothetical protein               | 0.46 | 0.09  |
| 2536 | LSU ribosomal protein L21E                   | 0.41 | 0.19  |
| 2537 | Hypothetical protein                         | 0.57 | 0.11  |
| 2538 | Conserved hypothetical protein               | 0.78 | 0.35  |
| 2539 | Dimethyladenosine transferase                | 1.11 | 0.05  |
| 2541 | Cation-transporting ATPase                   | 0.52 | 0     |
| 2542 | Phosphohydrolase (MUTT/NUDIX family protein) | 0.96 | 0.2   |
| 2545 | Hypothetical protein                         | 0.68 | 0.1   |
| 2546 | Transcriptional regulator (TetR family)      | 1.73 | 0.77  |
| 2547 | Putative ferredoxin                          | 1.45 | 0.46  |
| 2550 | Hypothetical protein                         | 1.44 | 1.21  |
| 2552 | Hypothetical protein                         | 0.8  | 0.3   |
| 2553 | Putative hydrolase                           | 2.33 | 0.92  |
| 2554 | Acetyltransferase                            | 1.13 | 0.17  |
| 2555 | Hypothetical protein                         | 1.17 | 0.49  |
| 2556 | ATP-dependent RNA helicase                   | 1.45 | 0.7   |
| 2557 | Catalase                                     | 4.76 | 2.7   |
| 2558 | Hypothetical protein                         | 0.94 | 0.66  |
| 2559 | Hypothetical protein                         | 2.03 | 0.22  |
| 2561 | Conserved hypothetical protein               | 1.21 | 0.13  |
| 2562 | Hypothetical protein                         | 0.82 | 0.39  |
| 2563 | Ferredoxin                                   | 1.65 | 0.37  |
| 2564 | Hypothetical protein                         | 0.56 | 0.15  |
| 2565 | Pyruvate formate-lyase activating enzyme     | 8.42 | 11.57 |
| 2566 | CODH nickel-insertion accessory protein CooC | 1.48 | 0.89  |
| 2567 | ABC transporter. periplasmic binding protein | 5.87 | 2.36  |

|      |                                                  |      |      |
|------|--------------------------------------------------|------|------|
| 2568 | ABC transporter. permease protein                | 3.16 | 3.65 |
| 2569 | ABC transporter. permease protein                | 8.2  | 2.44 |
| 2570 | ABC transporter. ATP-binding protein             | 2.55 | 2.81 |
| 2571 | ABC transporter. ATP-binding protein             | 4.17 | 2.3  |
| 2572 | Methyltransferase                                | 3.72 | 2.21 |
| 2573 | Iron dependent transcriptional repressor         | 1.21 | 0.05 |
| 2575 | Hypothetical protein                             | 0.28 | 0.15 |
| 2577 | Ferrous iron transport protein A                 | 0.22 | 0.12 |
| 2578 | Ferrous iron transport protein A                 | 0.34 | 0.14 |
| 2582 | Hypothetical protein                             | 0.8  | 0.08 |
| 2583 | Sec-independent protein translocase. protein     | 0.85 | 0.05 |
| 2584 | Sec-independent protein translocase protein TatA | 0.54 | 0.23 |
| 2585 | Sec-independent protein translocase. protein     | 0.51 | 0.24 |
| 2586 | Sec-independent protein translocase. protein     | 1.32 | 0.28 |
| 2592 | Hypothetical protein                             | 2.5  | 0.49 |
| 2593 | Hypothetical protein                             | 0.52 | 0.38 |
| 2594 | Hypothetical protein                             | 3.99 | 3.44 |
| 2595 | Hypothetical protein                             | 0.93 | 0.33 |
| 2596 | Hypothetical protein                             | 1.84 | 0.5  |
| 2597 | Hypothetical protein                             | 2.83 | 0.47 |
| 2598 | Hypothetical protein                             | 2.66 | 1    |
| 2599 | Hypothetical protein                             | 1.51 | 0.44 |
| 2602 | Hypothetical protein                             | 3.07 | 0.38 |
| 2603 | Hypothetical protein                             | 3.26 | 2.15 |
| 2604 | Conserved protein                                | 0.97 | 0.2  |
| 2605 | Conserved protein                                | 1.18 | 0.15 |
| 2606 | Hypothetical protein                             | 1.26 | 0.01 |

|      |                                                     |      |      |
|------|-----------------------------------------------------|------|------|
| 2607 | Nucleotidyltransferase                              | 1.44 | 0.33 |
| 2608 | Nucleotidyltransferase                              | 1.37 | 0.13 |
| 2609 | Nucleotidyltransferase                              | 1.57 | 0.51 |
| 2612 | Probable ATP-dependent helicase                     | 1.12 | 0.2  |
| 2613 | LemA protein                                        | 1.92 | 0.71 |
| 2614 | Hypothetical protein                                | 1.48 | 1.35 |
| 2615 | Hypothetical protein                                | 1.29 | 0    |
| 2616 | LSU ribosomal protein L15E                          | 0.41 | 0.2  |
| 2617 | Hypothetical protein                                | 0.59 | 0.1  |
| 2618 | Hypothetical protein                                | 0.42 | 0.13 |
| 2619 | Hypothetical protein                                | 0.7  | 0.35 |
| 2620 | Proteasome. subunit-alpha                           | 0.46 | 0.35 |
| 2621 | Hypothetical protein                                | 0.62 | 0.52 |
| 2622 | Hypothetical protein                                | 0.54 | 0.53 |
| 2623 | Ribonuclease                                        | 0.45 | 0.36 |
| 2624 | Ribonuclease                                        | 0.46 | 0.29 |
| 2625 | LSU ribosomal protein L37AE                         | 0.34 | 0.21 |
| 2626 | Putative nucleotidyltransferase                     | 0.55 | 0.36 |
| 2627 | Conserved protein                                   | 0.71 | 0.46 |
| 2628 | Conserved protein                                   | 0.46 | 0.35 |
| 2629 | Hypothetical sensory transduction histidine kinase  | 3.85 | 2.75 |
| 2631 | Hypothetical protein                                | 1.38 | 0.11 |
| 2632 | NAD-dependent malic enzyme                          | 1.28 | 0.11 |
| 2634 | 2-Keto acid:ferredoxin oxidoreductase subunit alpha | 0.84 | 0.04 |
| 2635 | Putative pyruvate:ferredoxin oxidoreductase         | 0.74 | 0.12 |
| 2636 | Coenzyme F390 synthetase/phenylacetyl-CoA ligase    | 2.77 | 3.36 |
| 2639 | Conserved protein                                   | 3.29 | 1.08 |



|      |                                                         |      |      |
|------|---------------------------------------------------------|------|------|
| 2640 | Magnesium and cobalt transport protein CorA             | 1.9  | 0.79 |
| 2642 | Hypothetical protein                                    | 1.59 | 0.17 |
| 2643 | Hypothetical protein                                    | 0.6  | 0.11 |
| 2644 | Putative molybdopterin converting factor                | 1.17 | 0.07 |
| 2645 | Aldehyde ferredoxin oxidoreductase. tungsten-containing | 1.46 | 0.1  |
| 2649 | Aspartate aminotransferase                              | 0.42 | 0.22 |
| 2650 | Hydrolase                                               | 1.28 | 0.14 |
| 2652 | Hypothetical protein                                    | 1.65 | 0.66 |
| 2653 | N5.N10-methenyltetrahydromethanopterin cyclohydrolase   | 0.49 | 0.46 |
| 2654 | Hypothetical protein                                    | 0.56 | 0.16 |
| 2656 | Peptidyl-prolyl cis-trans isomerase                     | 0.33 | 0.18 |
| 2657 | transcriptional regulator                               | 2.31 | 0.81 |
| 2658 | Acetyltransferase                                       | 1.59 | 0.38 |
| 2659 | Acetyltransferase                                       | 0.89 | 0.32 |
| 2663 | Conserved protein                                       | 5.15 | 3.66 |
| 2664 | Conserved protein                                       | 2.13 | 1.91 |
| 2666 | Conserved protein                                       | 1.55 | 0.13 |
| 2667 | Conserved protein                                       | 1.88 | 0.24 |
| 2668 | Hypothetical protein                                    | 1.43 | 0.49 |
| 2669 | Conserved protein                                       | 1.87 | 0.08 |
| 2672 | Conserved protein                                       | 1.51 | 0.27 |
| 2674 | Conserved protein                                       | 4    | 3.45 |
| 2676 | Conserved protein                                       | 0.92 | 0.07 |
| 2677 | Conserved protein                                       | 1.82 | 0.41 |
| 2679 | Conserved protein                                       | 1.01 | 0.32 |

|      |                                                            |      |       |
|------|------------------------------------------------------------|------|-------|
| 2681 | Hypothetical protein                                       | 1.02 | 0.55  |
| 2691 | Hypothetical protein                                       | 0.66 | 0.17  |
| 2697 | Hypothetical protein                                       | 1.52 | 0.36  |
| 2702 | Hypothetical protein                                       | 0.86 | 0.27  |
| 2703 | Type I restriction-modification system specificity subunit | 2.04 | 0.8   |
| 2704 | Type I restriction-modification system methylation subunit | 1.58 | 0.57  |
| 2705 | Type I restriction-modification system restriction subunit | 4.38 | 2.89  |
| 2706 | Conserved protein                                          | 9.32 | 13.58 |
| 2708 | Conserved protein                                          | 1.65 | 0.02  |
| 2709 | Conserved protein                                          | 2.01 | 0.18  |
| 2710 | Conserved protein                                          | 1.42 | 0.2   |
| 2711 | Conserved protein                                          | 1.29 | 0.59  |
| 2712 | Conserved protein                                          | 0.78 | 0.11  |
| 2713 | Homoserine dehydrogenase                                   | 0.71 | 0.04  |
| 2714 | ATP-dependent DNA ligase                                   | 1.15 | 0.15  |
| 2715 | Hypothetical protein                                       | 0.93 | 0.15  |
| 2717 | Conserved protein                                          | 1.12 | 0.04  |
| 2718 | Hypothetical protein                                       | 0.67 | 0.16  |
| 2719 | Conserved protein                                          | 0.75 | 0.15  |
| 2721 | Conserved protein                                          | 3.47 | 1.58  |
| 2722 | Hypothetical protein                                       | 4.71 | 1.53  |
| 2723 | Phosphoenolpyruvate synthase                               | 4.85 | 3.31  |
| 2724 | Hypothetical protein                                       | 3.04 | 1.63  |
| 2725 | Transposase                                                | 1.39 | 0.25  |
| 2726 | Hypothetical protein                                       | 1.18 | 0.05  |

|      |                                                            |       |       |
|------|------------------------------------------------------------|-------|-------|
| 2727 | Conserved protein                                          | 1.46  | 0     |
| 2728 | Hypothetical protein                                       | 1.88  | 1.68  |
| 2730 | Conserved protein                                          | 1.11  | 0.38  |
| 2732 | Conserved protein                                          | 1.28  | 0.35  |
| 2737 | Conserved protein                                          | 0.84  | 0.1   |
| 2740 | Type I restriction-modification system methylation subunit | 0.84  | 0.2   |
| 2742 | Hypothetical protein                                       | 0.68  | 0.25  |
| 2743 | Hypothetical protein                                       | 1.78  | 0.89  |
| 2745 | Conserved protein                                          | 1.24  | 0.45  |
| 2748 | Hypothetical sensory transduction histidine kinase         | 1.63  | 0.81  |
| 2749 | Aminoacyl-histidine dipeptidase                            | 1.98  | 1     |
| 2751 | Conserved protein                                          | 1.77  | 0.06  |
| 2754 | Conserved protein                                          | 0.51  | 0.36  |
| 2756 | Hypothetical protein                                       | 0.96  | 0.43  |
| 2758 | Hypothetical protein                                       | 0.93  | 0.45  |
| 2760 | Hypothetical protein                                       | 1.13  | 0.14  |
| 2763 | Putative DNA recombinase                                   | 0.73  | 0.23  |
| 2764 | Hypothetical protein                                       | 3.33  | 1.52  |
| 2765 | Hypothetical protein                                       | 12.21 | 12.89 |
| 2766 | Hypothetical protein                                       | 2.18  | 1.28  |
| 2768 | Conserved protein                                          | 8     | 9.64  |
| 2769 | Iron-containing alcohol dehydrogenase                      | 1.72  | 0.25  |
| 2772 | Conserved protein                                          | 0.79  | 0.48  |
| 2773 | Two component system histidine kinase                      | 1.99  | 1.33  |
| 2774 | Conserved protein                                          | 1.7   | 0.72  |
| 2779 | Putative phosphoglycerate mutase                           | 1.49  | 0.31  |

|      |                                                         |       |       |
|------|---------------------------------------------------------|-------|-------|
| 2781 | Conserved protein                                       | 2     | 1.3   |
| 2782 | Glyceraldehyde 3-phosphate dehydrogenase                | 0.88  | 0.71  |
| 2783 | Suppressor protein SuhB homolog                         | 0.83  | 0.46  |
| 2784 | Hypothetical protein                                    | 1.12  | 0.06  |
| 2785 | 2-Isopropylmalate synthase                              | 0.92  | 0.23  |
| 2786 | Conserved protein                                       | 1.55  | 0.17  |
| 2787 | Conserved protein                                       | 4.08  | 2.47  |
| 2788 | Indolepyruvate oxidoreductase. alpha subunit            | 40.47 | 56.57 |
| 2789 | Hypothetical protein                                    | 0.58  | 0.07  |
| 2790 | Iron-sulfur flavoprotein                                | 1.06  | 0.02  |
| 2792 | Molybdopterin converting factor. subunit 2              | 0.77  | 0.06  |
| 2793 | Molybdopterin-guanine dinucleotide biosynthesis protein | 0.73  | 0.03  |
| 2794 | Hypothetical protein                                    | 0.61  | 0.16  |
| 2795 | Conserved protein                                       | 0.6   | 0.32  |
| 2796 | Conserved protein                                       | 0.46  | 0.13  |
| 2800 | Conserved protein                                       | 1.97  | 1.44  |
| 2802 | Hypothetical protein                                    | 1.41  | 0.3   |
| 2803 | Carbon monoxide dehydrogenase accessory protein         | 1.78  | 1.12  |
| 2805 | Asparagine synthetase [glutamine-hydrolyzing]           | 0.44  | 0.02  |
| 2806 | Hypothetical protein                                    | 0.39  | 0.11  |
| 2807 | Phosphoribosylformylglycinamide synthase                | 0.59  | 0.25  |
| 2808 | Conserved protein                                       | 1.11  | 0.3   |
| 2809 | Conserved protein                                       | 1.4   | 0.22  |
| 2810 | Conserved protein                                       | 1.16  | 0.11  |
| 2811 | Conserved protein                                       | 0.51  | 0.09  |
| 2812 | Phenylalanyl-tRNA synthetase. beta chain                | 0.76  | 0.1   |

|      |                                                           |       |       |
|------|-----------------------------------------------------------|-------|-------|
| 2813 | Hypothetical protein                                      | 1.34  | 0.02  |
| 2816 | Conserved protein                                         | 2.78  | 1.31  |
| 2817 | Anthranilate synthase. component II                       | 0.06  | 0.03  |
| 2818 | Anthranilate synthase. component I                        | 0.08  | 0.04  |
| 2819 | N-5'-phosphoribosyl)anthranilate isomerase                | 0.09  | 0.1   |
| 2820 | Anthranilate phosphoribosyltransferase                    | 0.89  | 1.34  |
| 2821 | Tryptophan synthase. alpha chain                          | 0.41  | 0.53  |
| 2822 | Tryptophan synthase. beta chain                           | 0.14  | 0.09  |
| 2823 | Indole-3-glycerol phosphate synthase                      | 0.19  | 0.18  |
| 2824 | Coenzyme F420-dependent glucose-6-phosphate dehydrogenase | 2.03  | 1.36  |
| 2827 | Hypothetical protein                                      | 1.08  | 0.03  |
| 2829 | Peptidyl-prolyl cis-trans isomerase                       | 1.15  | 0.1   |
| 2831 | ABC transporter. permease protein                         | 1.97  | 0.51  |
| 2832 | ABC transporter. permease protein                         | 0.49  | 0.41  |
| 2833 | ABC transporter. ATP-binding protein                      | 74.98 | 61.67 |
| 2834 | Hypothetical protein                                      | 1.34  | 0.55  |
| 2835 | Hypothetical protein                                      | 0.39  | 0.13  |
| 2836 | Enolase                                                   | 0.57  | 0.44  |
| 2839 | MoxR-like ATPase                                          | 1.66  | 0.23  |
| 2840 | Hypothetical protein                                      | 1.78  | 0.13  |
| 2842 | 5-Nitroimidazole antibiotic resistance protein            | 1.16  | 0.02  |
| 2844 | Hypothetical protein                                      | 1.41  | 0.98  |
| 2845 | Hypothetical protein                                      | 1.24  | 0.39  |
| 2848 | Conserved protein                                         | 0.59  | 0.15  |
| 2849 | Hypothetical permease                                     | 5.26  | 6.69  |
| 2850 | ABC transporter. permease protein                         | 1.85  | 0.61  |

|      |                                                    |      |      |
|------|----------------------------------------------------|------|------|
| 2851 | Transcriptional regulator. MarR family             | 0.18 | 0.01 |
| 2853 | Hypothetical protein                               | 3.03 | 3.51 |
| 2855 | ABC transporter. permease protein                  | 0.78 | 0.52 |
| 2857 | Hypothetical protein                               | 2.23 | 0.7  |
| 2859 | Hypothetical protein                               | 1.28 | 0.04 |
| 2860 | Conserved protein                                  | 1.76 | 1.97 |
| 2861 | Transcriptional regulator. ArsR family             | 0.9  | 0.06 |
| 2862 | Hypothetical protein                               | 1.12 | 0.72 |
| 2867 | Coenzyme F390 synthetase/phenylacetyl-CoA ligase   | 1.72 | 0.62 |
| 2869 | Hypothetical protein                               | 2.08 | 0.25 |
| 2870 | Hypothetical protein                               | 1.91 | 0.69 |
| 2871 | Hypothetical protein                               | 2.28 | 0.32 |
| 2872 | Methyltransferase                                  | 1.24 | 0.49 |
| 2873 | L-sorbose dehydrogenase                            | 1.64 | 1.29 |
| 2874 | Conserved protein                                  | 1.52 | 0.95 |
| 2876 | DNA polymerase IV                                  | 1.99 | 0.22 |
| 2879 | Tetratrico peptide repeat protein                  | 1.94 | 0.54 |
| 2882 | Conserved protein                                  | 1.89 | 0.63 |
| 2885 | Metalloendopeptidases (putative)                   | 1.3  | 0.63 |
| 2886 | Hypothetical sensory transduction histidine kinase | 1.07 | 0.64 |
| 2887 | Conserved protein                                  | 0.98 | 0.33 |
| 2889 | Hypothetical protein                               | 1.57 | 1.09 |
| 2890 | Hypothetical protein                               | 1.09 | 0.75 |
| 2891 | ABC transporter. permease protein                  | 1.12 | 0.63 |
| 2892 | ABC transporter. permease protein                  | 1.61 | 0.16 |
| 2893 | Hypothetical protein                               | 1.12 | 0.5  |
| 2894 | Hypothetical protein                               | 0.85 | 0.1  |

|      |                                                    |      |      |
|------|----------------------------------------------------|------|------|
| 2895 | Transcriptional regulator                          | 0.96 | 0.56 |
| 2899 | Conserved protein                                  | 3.39 | 1.42 |
| 2900 | Conserved protein                                  | 2.18 | 0.61 |
| 2909 | Conserved protein                                  | 1.53 | 0.22 |
| 2910 | Adenine deaminase                                  | 1.1  | 0.11 |
| 2911 | Phosphoserine aminotransferase                     | 2.06 | 1.14 |
| 2912 | 5-Oxoprolinase                                     | 0.53 | 0.03 |
| 2915 | Hypothetical protein                               | 1.64 | 1.06 |
| 2916 | Flavoprotein                                       | 1.48 | 0.21 |
| 2917 | Oxidoreductase. aldo/keto family                   | 0.67 | 0.09 |
| 2919 | Hypothetical protein                               | 2.02 | 0.54 |
| 2920 | Ribosomal-protein-alanine acetyltransferase        | 1.78 | 0.26 |
| 2923 | Hypothetical protein                               | 1.45 | 1.16 |
| 2928 | Hypothetical protein                               | 1.45 | 0.71 |
| 2929 | Hypothetical protein                               | 1.29 | 0.84 |
| 2930 | Hypothetical protein                               | 0.47 | 0.19 |
| 2931 | Hydrolase                                          | 5.24 | 3.98 |
| 2932 | Conserved protein                                  | 1.29 | 0.67 |
| 2933 | Conserved protein                                  | 2.54 | 0.46 |
| 2937 | Conserved protein                                  | 3.24 | 1.96 |
| 2938 | Conserved protein                                  | 2.37 | 1.51 |
| 2939 | Serine O-acetyltransferase                         | 0.78 | 0.36 |
| 2940 | Conserved protein                                  | 1.25 | 0.68 |
| 2941 | Hypothetical protein                               | 2.08 | 0.1  |
| 2942 | Conserved protein                                  | 1.11 | 0.21 |
| 2943 | Lipopolysaccharide N-acetylglucosaminyltransferase | 0.9  | 0.4  |
| 2948 | Conserved protein                                  | 0.62 | 0.12 |

|      |                                                                      |       |       |
|------|----------------------------------------------------------------------|-------|-------|
| 2949 | Hypothetical protein                                                 | 0.73  | 0.67  |
| 2950 | Conserved protein                                                    | 0.81  | 0.41  |
| 2951 | Hypothetical protein                                                 | 0.61  | 0.41  |
| 2952 | Conserved protein                                                    | 2.13  | 0.92  |
| 2953 | Transcriptional regulator                                            | 0.52  | 0.16  |
| 2954 | Transcriptional regulator                                            | 1.29  | 0.54  |
| 2955 | Hypothetical sensory transduction histidine kinase                   | 1.78  | 0.24  |
| 2956 | Conserved protein                                                    | 0.85  | 0.65  |
| 2957 | Transposase                                                          | 0.39  | 0.23  |
| 2958 | Conserved protein                                                    | 1.67  | 0.2   |
| 2959 | Hypothetical protein                                                 | 2.31  | 1.39  |
| 2960 | Hypothetical protein                                                 | 0.81  | 0.41  |
| 2962 | Dimethylamine:corrinoide methyltransferase MtbB3                     | 34.93 | 36.99 |
| 2963 | Dimethylamine:corrinoide methyltransferase MtbB3 (C-terminal domain) | 35.14 | 23.65 |
| 2965 | Hypothetical sensory transduction histidine kinase                   | 1.78  | 0.16  |
| 2966 | Conserved protein                                                    | 2.14  | 0.31  |
| 2967 | Isoleucyl-tRNA synthetase                                            | 0.82  | 0.54  |
| 2968 | Conserved protein                                                    | 0.66  | 0.1   |
| 2972 | Hypothetical protein                                                 | 3.01  | 0.15  |
| 2973 | Hypothetical protein                                                 | 0.77  | 0.23  |
| 2976 | Type I restriction-modification system restriction subunit           | 1.44  | 0.1   |
| 2977 | Hypothetical protein                                                 | 1.25  | 0.08  |
| 2978 | Type I restriction-modification system specificity subunit           | 0.94  | 0.04  |
| 2979 | Hypothetical protein                                                 | 1.28  | 0.01  |
| 2980 | Hypothetical protein                                                 | 1.1   | 0.18  |



|      |                                                            |       |       |
|------|------------------------------------------------------------|-------|-------|
| 2981 | Type I restriction-modification system methylation subunit | 1.23  | 0.1   |
| 2982 | Antibiotic resistance protein                              | 1.38  | 1.3   |
| 2987 | Hypothetical protein                                       | 1.35  | 0.26  |
| 2988 | Conserved protein                                          | 2.27  | 0.76  |
| 2989 | Pyruvate formate-lyase activating enzyme                   | 2.16  | 0.81  |
| 2993 | Phosphoglycerate mutase                                    | 3.77  | 4.02  |
| 2994 | Conserved protein                                          | 0.85  | 0.28  |
| 2995 | Hypothetical protein                                       | 0.65  | 0.37  |
| 2996 | Hypothetical protein                                       | 0.67  | 0.41  |
| 2997 | Hypothetical protein                                       | 1.15  | 0.68  |
| 2998 | Transposase                                                | 1.28  | 0.77  |
| 3000 | DNA repair helicase (RAD25/XPB family)                     | 1.63  | 0.17  |
| 3004 | Conserved protein                                          | 1.64  | 0.41  |
| 3005 | Acetyltransferase                                          | 0.52  | 0.16  |
| 3006 | Probable resolvase/ recombinase                            | 1.74  | 0.57  |
| 3007 | Probable transcriptional regulator                         | 1.45  | 0.04  |
| 3009 | Membrane metalloprotease                                   | 0.62  | 0.06  |
| 3010 | Periplasmic divalent cation tolerance protein              | 10.68 | 16.16 |
| 3011 | Hypothetical protein                                       | 1.63  | 1.24  |
| 3012 | Hypothetical protein                                       | 3.41  | 1.15  |
| 3013 | ABC transporter. permease protein                          | 3.64  | 3.92  |
| 3014 | Conserved protein                                          | 6.68  | 4.14  |
| 3017 | ABC transporter. permease protein                          | 3.69  | 2.47  |
| 3018 | Conserved protein                                          | 10.2  | 11.14 |
| 3019 | Conserved protein                                          | 6.17  | 2.28  |
| 3020 | Conserved protein                                          | 7.67  | 4.93  |

|      |                                                 |       |       |
|------|-------------------------------------------------|-------|-------|
| 3021 | ABC transporter. ATP-binding protein            | 3.88  | 1.51  |
| 3022 | Conserved protein                               | 10.11 | 8.37  |
| 3023 | Conserved protein                               | 9.66  | 6.65  |
| 3024 | Conserved protein                               | 3.2   | 4.74  |
| 3025 | Hypothetical protein                            | 1.66  | 1.47  |
| 3030 | Conserved protein                               | 1.77  | 0.19  |
| 3032 | Conserved protein                               | 1.49  | 0.7   |
| 3036 | Hypothetical protein                            | 1.27  | 0.19  |
| 3042 | Coenzyme F420 hydrogenase. beta subunit         | 0.62  | 0.23  |
| 3043 | Coenzyme F420 hydrogenase. gamma subunit        | 0.5   | 0.4   |
| 3044 | Coenzyme F420 hydrogenase. delta subunit        | 0.58  | 0.45  |
| 3045 | Coenzyme F420 hydrogenase. alpha subunit        | 0.74  | 0.42  |
| 3056 | Competence-like protein                         | 1.18  | 0.16  |
| 3058 | Iron-sulfur flavoprotein                        | 1.52  | 0.04  |
| 3059 | Conserved protein                               | 1.71  | 0.76  |
| 3063 | Calcium dependent protease                      | 3.39  | 2.94  |
| 3068 | Conserved protein                               | 1.83  | 0.93  |
| 3076 | DNA topoisomerase I                             | 0.62  | 0.34  |
| 3077 | Probable transcriptional regulator              | 0.61  | 0.07  |
| 3078 | mRNA 3'-end processing factor                   | 1.97  | 0.64  |
| 3079 | Hypothetical protein                            | 2.15  | 1.97  |
| 3080 | Hypothetical protein                            | 1.89  | 0.29  |
| 3085 | Cystathionine gamma-synthase                    | 4.37  | 2.78  |
| 3086 | Nicotinate phosphoribosyltransferase            | 1.72  | 0.13  |
| 3089 | Hypothetical protein                            | 1.2   | 0.68  |
| 3090 | Hypothetical protein                            | 1.01  | 0.24  |
| 3091 | Phycocyanin alpha-subunit phycocyanobilin lyase | 88.11 | 63.03 |

|      |                                        |       |       |
|------|----------------------------------------|-------|-------|
|      | related protein. CpcE/NblB family      |       |       |
| 3092 | Hypothetical protein                   | 34.82 | 27.53 |
| 3093 | Hypothetical protein                   | 9.4   | 4.13  |
| 3094 | Hypothetical protein                   | 3.94  | 2.78  |
| 3095 | ABC transporter. ATP-binding protein   | 25.17 | 22.38 |
| 3096 | Hypothetical protein                   | 18.49 | 23.65 |
| 3097 | Hypothetical protein                   | 17.35 | 21.08 |
| 3098 | ABC transporter. permease protein      | 11.9  | 13.87 |
| 3099 | Two component system histidine kinase  | 2.49  | 0.71  |
| 3100 | Hypothetical protein                   | 2.95  | 1.31  |
| 3101 | Two component system histidine kinase  | 4.67  | 0.82  |
| 3103 | Hypothetical protein                   | 1.14  | 1.21  |
| 3104 | Hypothetical protein                   | 1.74  | 1.94  |
| 3105 | Probable cytosine deaminase            | 1.23  | 0.3   |
| 3107 | Hypothetical protein                   | 0.96  | 0.05  |
| 3108 | Hypothetical protein                   | 0.83  | 0.3   |
| 3109 | Glycogen phosphorylase                 | 2.3   | 0.11  |
| 3110 | Hypothetical protein                   | 0.81  | 0.43  |
| 3111 | Hypothetical protein                   | 1     | 0.24  |
| 3112 | Conserved protein                      | 1.07  | 0.24  |
| 3113 | Oligoendopeptidase F                   | 1.27  | 0.09  |
| 3115 | Hypothetical protein                   | 0.97  | 0.1   |
| 3116 | Hypothetical protein                   | 1.73  | 1.36  |
| 3117 | Transcriptional regulator. MarR family | 1.21  | 0.05  |
| 3118 | ATP-dependent protease La              | 3.64  | 1.71  |
| 3119 | Iron-sulfur flavoprotein               | 2.31  | 0.12  |
| 3120 | Hypothetical protein                   | 0.79  | 0.06  |

|      |                                                            |       |       |
|------|------------------------------------------------------------|-------|-------|
| 3121 | Hypothetical protein                                       | 0.34  | 0.08  |
| 3122 | Putative hydrolase                                         | 1.17  | 0.11  |
| 3123 | Hypothetical protein                                       | 0.63  | 0.05  |
| 3126 | Hypothetical protein                                       | 1.13  | 0.34  |
| 3127 | Hypothetical protein                                       | 0.45  | 0.18  |
| 3130 | Hypothetical protein                                       | 0.33  | 0.18  |
| 3131 | Fructokinase                                               | 0.76  | 0.12  |
| 3132 | Hypothetical protein                                       | 0.89  | 0.61  |
| 3133 | Hypothetical protein                                       | 1.39  | 0.63  |
| 3134 | Protease HTPX                                              | 1.3   | 0.71  |
| 3135 | ABC transporter. ATP-binding protein                       | 1.01  | 0.62  |
| 3137 | TRANSPORTER. LysE family                                   | 21.04 | 28.93 |
| 3139 | Large-conductance mechanosensitive channel                 | 1.24  | 0.19  |
| 3141 | Type I restriction-modification system restriction subunit | 3.14  | 0.06  |
| 3142 | Type I restriction-modification system specificity subunit | 0.98  | 0.21  |
| 3143 | Hypothetical protein                                       | 0.95  | 0.16  |
| 3146 | Hypothetical protein                                       | 1.79  | 0.85  |
| 3147 | Type I restriction-modification system methylation subunit | 0.52  | 0.06  |
| 3148 | Exodeoxyribonuclease III                                   | 1.05  | 0.46  |
| 3149 | Hypothetical protein                                       | 3.4   | 0.4   |
| 3151 | Hypothetical protein                                       | 1.66  | 0.32  |
| 3152 | Hypothetical protein                                       | 1.66  | 0.18  |
| 3155 | Hypothetical protein                                       | 1.21  | 0.52  |
| 3166 | Hypothetical protein                                       | 0.71  | 0.08  |
| 3169 | Hypothetical protein                                       | 2.72  | 0.27  |

|      |                                          |      |      |
|------|------------------------------------------|------|------|
| 3171 | Hypothetical protein                     | 1.08 | 0.36 |
| 3173 | Transcriptional regulator. ArsR family   | 1.38 | 0.24 |
| 3175 | Hypothetical protein                     | 1.51 | 0.4  |
| 3177 | Hypothetical protein                     | 1.21 | 0.24 |
| 3178 | Hypothetical protein                     | 3.79 | 4.11 |
| 3179 | Transcriptional regulator                | 0.33 | 0.06 |
| 3180 | Putative acetyl-CoA synthetase           | 0.39 | 0.16 |
| 3181 | Ketoisovalerate oxidoreductase subunit   | 0.37 | 0.21 |
| 3182 | Ketoisovalerate oxidoreductase subunit   | 0.52 | 0.16 |
| 3183 | Ketoisovalerate oxidoreductase subunit   | 0.55 | 0.4  |
| 3184 | Conserved protein                        | 1.38 | 1.32 |
| 3185 | Ornithine decarboxylase                  | 2.58 | 3.82 |
| 3187 | Flavodoxin                               | 4.38 | 0.88 |
| 3188 | Glutamine synthetase                     | 0.35 | 0.2  |
| 3189 | Potassium channel protein                | 1.95 | 0.24 |
| 3190 | Hypothetical protein                     | 0.64 | 0.01 |
| 3191 | Hypothetical protein                     | 0.58 | 0.33 |
| 3192 | Hypothetical membrane spanning protein   | 0.76 | 0.45 |
| 3193 | Hypothetical membrane associated protein | 0.66 | 0.4  |
| 3194 | Uncharacterized membrane protein         | 0.51 | 0.26 |
| 3195 | Transcriptional regulator. MarR family   | 0.42 | 0.17 |
| 3198 | Hypothetical protein                     | 1.48 | 0.16 |
| 3199 | Transporter                              | 0.53 | 0.28 |
| 3202 | Conserved protein                        | 2.17 | 1.05 |
| 3207 | Protease (putative)                      | 0.74 | 0.26 |
| 3209 | Transporter                              | 0.54 | 0.3  |
| 3212 | Hypothetical protein                     | 0.11 | 0.03 |

|      |                                                   |      |      |
|------|---------------------------------------------------|------|------|
| 3213 | Prismane protein                                  | 0.64 | 0.4  |
| 3216 | Conserved protein                                 | 1.01 | 0.36 |
| 3219 | Conserved protein                                 | 1.96 | 0.25 |
| 3220 | Transporter                                       | 3.25 | 0.69 |
| 3223 | ABC transporter. ATP-binding protein              | 3.82 | 3.46 |
| 3226 | Conserved protein                                 | 1.36 | 0.43 |
| 3230 | Phosphate permease                                | 0.2  | 0.05 |
| 3231 | Conserved protein                                 | 0.63 | 0.26 |
| 3234 | Hydroxyethylthiazole kinase                       | 0.37 | 0.12 |
| 3235 | Thiamin-phosphate pyrophosphorylase               | 0.57 | 0.32 |
| 3239 | Hypothetical protein                              | 1.58 | 0.67 |
| 3240 | Probable transcriptional regulator                | 0.9  | 0.4  |
| 3243 | Hypothetical protein                              | 0.56 | 0.12 |
| 3244 | Hypothetical protein                              | 0.71 | 0.26 |
| 3255 | Hypothetical protein                              | 4.06 | 3.41 |
| 3257 | Conserved protein                                 | 1.36 | 0.23 |
| 3262 | Branched-chain amino acid transport protein       | 0.3  | 0.23 |
| 3263 | Branched-chain amino acid transport protein       | 0.37 | 0.23 |
| 3267 | Conserved protein                                 | 2.24 | 0.46 |
| 3268 | NADPH-flavin oxidoreductase                       | 1.15 | 0.06 |
| 3269 | Serine O-acetyltransferase                        | 2.01 | 0.65 |
| 3270 | Ferredoxin-thioredoxin reductase. catalytic chain | 0.87 | 0.08 |
| 3271 | Glutaredoxin                                      | 1.31 | 0.18 |
| 3274 | Hypothetical protein                              | 0.53 | 0.31 |
| 3275 | Conserved protein                                 | 1.8  | 0.92 |
| 3276 | Hypothetical protein                              | 2.84 | 0.97 |
| 3277 | Protease I                                        | 2.33 | 0.79 |

|      |                                                    |      |      |
|------|----------------------------------------------------|------|------|
| 3278 | Hypothetical Membrane Spanning protein             | 0.98 | 0.17 |
| 3279 | Dihydrolipoamide dehydrogenase                     | 2.4  | 1.73 |
| 3282 | Probable ATP-dependent helicase                    | 0.56 | 0.12 |
| 3284 | Transcriptional regulator                          | 0.9  | 0.46 |
| 3286 | Hypothetical protein                               | 1.33 | 0.26 |
| 3287 | Hypothetical protein                               | 2.25 | 0.52 |
| 3288 | Conserved protein                                  | 6.56 | 7.49 |
| 3289 | Excinuclease ABC. subunit B                        | 1.44 | 0.35 |
| 3291 | Excinuclease ABC. subunit A                        | 1.1  | 0.72 |
| 3293 | Iron-sulfur cluster-binding protein                | 1.22 | 0.25 |
| 3295 | Hypothetical sensory transduction histidine kinase | 0.7  | 0.13 |
| 3298 | Glutamate dehydrogenase                            | 1.13 | 0.06 |
| 3299 | Hypothetical protein                               | 1.12 | 0.48 |
| 3300 | Phosphoadenosine phosphosulfate reductase          | 0.47 | 0.1  |
| 3304 | Threonyl-tRNA synthetase                           | 0.43 | 0.2  |
| 3305 | Putative DNA or RNA helicase of superfamily II     | 1.98 | 0.04 |
| 3307 | Conserved protein                                  | 1.4  | 0.2  |
| 3308 | Conserved protein                                  | 0.61 | 0.06 |
| 3309 | Ferredoxin                                         | 0.87 | 0.59 |
| 3310 | Transcriptional regulator. AraC family             | 2.08 | 0.91 |
| 3311 | Acetyltransferase                                  | 1.63 | 0.73 |
| 3313 | Hypothetical protein                               | 0.91 | 0.31 |
| 3314 | N-5'-phosphoribosyl)anthranilate isomerase         | 0.48 | 0.12 |
| 3315 | Hypothetical protein                               | 0.7  | 0.08 |
| 3320 | Oligopeptide transporter. permease protein         | 3.27 | 1.58 |
| 3321 | Oligopeptide transporter. permease protein         | 2.93 | 0.77 |
| 3322 | Oligopeptide-binding protein OppA                  | 3.19 | 1.55 |

|      |                                                                       |       |      |
|------|-----------------------------------------------------------------------|-------|------|
| 3323 | Oligopeptide transporter. ATP-binding protein                         | 2.69  | 0.24 |
| 3324 | Oligopeptide transporter. ATP-binding protein                         | 3.94  | 3.28 |
| 3325 | Permease. Na <sup>+</sup> /H <sup>+</sup> -dicarboxylate symporter    | 1.8   | 0.71 |
| 3326 | Aldehyde ferredoxin oxidoreductase                                    | 3.06  | 0.2  |
| 3327 | Ferredoxin                                                            | 2.83  | 0.57 |
| 3330 | O-linked N-acetylglucosamine transferase                              | 1.11  | 0.32 |
| 3332 | Putative ferredoxin                                                   | 1.88  | 0.52 |
| 3334 | Monomethylamine corrinoid protein MtmC2                               | 11.46 | 7.24 |
| 3335 | Monomethylamine:corrinoid methyltransferase MtmB2                     | 10.91 | 11.2 |
| 3336 | Monomethylamine:corrinoid methyltransferase MtmB2 (C-terminal domain) | 12.59 | 8.49 |
| 3338 | Hypothetical protein                                                  | 3.23  | 1.83 |
| 3339 | Hypothetical protein                                                  | 2.84  | 1.66 |
| 3340 | Hypothetical protein                                                  | 2.52  | 0.81 |
| 3342 | Conserved protein                                                     | 0.32  | 0.13 |
| 3345 | Hypothetical protein                                                  | 0.17  | 0.11 |
| 3346 | Hypothetical protein                                                  | 2.78  | 0.39 |
| 3350 | Hypothetical protein                                                  | 2.47  | 1.08 |
| 3351 | Hypothetical protein                                                  | 3.07  | 0.47 |
| 3352 | Hypothetical protein                                                  | 1.4   | 0.09 |
| 3370 | Hypothetical protein                                                  | 2.02  | 0.45 |
| 3371 | Conserved protein                                                     | 1.11  | 0.52 |
| 3372 | new orf                                                               | 0.73  | 0.28 |
| 3373 | new orf                                                               | 0.6   | 0.29 |
| 3376 | new orf                                                               | 1.03  | 0.69 |
| 3377 | new orf                                                               | 1.61  | 1.69 |
| 3380 | new orf                                                               | 1.53  | 2.5  |



|      |         |       |      |
|------|---------|-------|------|
| 3385 | new orf | 0.57  | 0.78 |
| 3387 | new orf | 0.61  | 0.04 |
| 3389 | new orf | 2.69  | 2.99 |
| 3390 | new orf | 15.56 | 19.8 |
| 3393 | new orf | 2.69  | 0.22 |
| 3395 | new orf | 1.35  | 0.87 |
| 3396 | new orf | 1.29  | 0.18 |
| 3404 | new orf | 1.1   | 0.84 |
| 3405 | new orf | 2.51  | 2.13 |
| 3407 | new orf | 1.84  | 1.18 |
| 3410 | new orf | 1.55  | 0.2  |
| 3413 | new orf | 0.33  | 0.09 |
| 3414 | new orf | 0.83  | 0.29 |

**Table S8:** Fold regulation of genes involved in cell appendix formation in cells forming aggregates after virus stress vs. unstressed cells determined by microarray analyses.

| ORF #         | annotation             | predicted function | fold regulation |
|---------------|------------------------|--------------------|-----------------|
| <i>MM316</i>  | FlaJ                   |                    | 1               |
| <i>MM317</i>  | FlaI                   |                    | n. d.           |
| <i>MM318</i>  | FlaH                   |                    | n. d.           |
| <i>MM322</i>  | Flagellin B1 precursor |                    | n. d.           |
| <i>MM323</i>  | Flagellin B1 precursur |                    | 1               |
| <i>MM412</i>  | FlaJ                   |                    | 1               |
| <i>MM413</i>  | FlaI                   |                    | n. d.           |
| <i>MM414</i>  | FlaH                   |                    | n. d.           |
| <i>MM418</i>  | Flagellin B1           |                    | n. d.           |
| <i>MM937</i>  | FlaJ                   |                    | n. d.           |
| <i>MM938</i>  | FlaI                   |                    | n. d.           |
| <i>MM939</i>  | FlaH                   |                    | ~1              |
| <i>MM2020</i> | twitching mobility     |                    | 0,5 +/- 0,1     |
| <i>MM477</i>  | hypothetical protein   | Pili_N Domain      | 2,9 +/- 0,5     |
| <i>MM527</i>  | hypothetical protein   | n. d.              | n. d.           |
| <i>MM1118</i> | hypothetical protein   | Disaggr. Domain    | 1               |
| <i>MM1120</i> | hypothetical protein   | Disaggr. Domain    | 1               |

|               |                      |                |       |
|---------------|----------------------|----------------|-------|
| <i>MM1510</i> | hypothetical protein | Pilin_N Domain |       |
| <i>MM1511</i> | hypothetical protein | Pilin_N Domain | 1     |
| <i>MM1570</i> | hypothetical protein | n. d.          | n. d. |
| <i>MM2543</i> | hypothetical protein | n. d.          | n. d. |
| <i>MM2828</i> | hypothetical protein | n. d.          | n. d. |
